# Supplementary material for: The tree that hides the forest: cryptic diversity and phylogenetic relationships in the Palaearctic vector Obsoletus/Scoticus Complex (Diptera: Ceratopogonidae) at the European level
Source: Parasit Vectors. 2020 May 20;13:265. doi: 10.1186/s13071-020-04114-1 (PMC7238629; doi:10.1186/s13071-020-04114-1)
Supplement: Supplementary file 4 — Additional file 4: Table S4. Information on all Culicoides sequenced and GenBank accession numbers. [file 13071_2020_4114_MOESM4_ESM.xlsx]

## Sheet: Feuil1
Sequence ID	Specimen ID	Species	Lenght (bp)	Locality	Country	Latitude	Longitude	Collection date	COI N° Accession	16rDNA N° Accession	28SrDNA N° Accession
Seq1	07_MA001_D7_03	Culicoides obsoletus	613	Rabat	Morocco	33.96	-6.8	2010	MT170026	/	/
Seq2	1PL_02_LCO_2	Culicoides obsoletus	613	Olszewnica	Poland	51.76	22.51	2016	MT170027	/	/
Seq3	1PL_03_LCO_3	Culicoides obsoletus	611	Olszewnica	Poland	51.76	22.51	2016	MT170028	/	/
Seq4	1PL_06_LCO_6	Culicoides obsoletus	611	Olszewnica	Poland	51.76	22.51	2016	MT170029	/	/
Seq5	1PL_08_LCO_8	Culicoides obsoletus	611	Olszewnica	Poland	51.76	22.51	2016	MT170030	/	/
Seq6	1PL_09_LCO_9	Culicoides obsoletus	611	Olszewnica	Poland	51.76	22.51	2016	MT170031	/	/
Seq7	1PL_10_LCO_10	Culicoides obsoletus	611	Olszewnica	Poland	51.76	22.51	2016	MT170032	/	/
Seq8	1PL_15_LCO_15	Culicoides obsoletus	610	Olszewnica	Poland	51.76	22.51	2016	MT170033	/	/
Seq9	1PL_16_LCO_16	Culicoides obsoletus	613	Olszewnica	Poland	51.76	22.51	2016	MT170034	/	/
Seq10	1PL_17_LCO_17	Culicoides obsoletus	613	Olszewnica	Poland	51.76	22.51	2016	MT170035	/	/
Seq11	1PL_18_LCO_18	Culicoides obsoletus	613	Olszewnica	Poland	51.76	22.51	2016	MT170036	/	/
Seq12	1PL_19_LCO_19	Culicoides obsoletus	612	Olszewnica	Poland	51.76	22.51	2016	MT170037	/	/
Seq13	1PL_21_LCO_21	Culicoides obsoletus	612	Olszewnica	Poland	51.76	22.51	2016	MT170038	/	/
Seq14	1PL_22_LCO_22	Culicoides obsoletus	612	Olszewnica	Poland	51.76	22.51	2016	MT170039	/	/
Seq15	1PL_23_LCO_23	Culicoides obsoletus	611	Olszewnica	Poland	51.76	22.51	2016	MT170040	/	/
Seq16	1PL_25_LCO_25	Culicoides obsoletus	570	Olszewnica	Poland	51.76	22.51	2016	MT170041	/	/
Seq17	1PL_26_LCO_26	Culicoides obsoletus	609	Olszewnica	Poland	51.76	22.51	2016	MT170042	/	/
Seq18	1PL_27_LCO_27	Culicoides obsoletus	611	Olszewnica	Poland	51.76	22.51	2016	MT170043	/	/
Seq19	1PL_30_LCO_30	Culicoides obsoletus	612	Olszewnica	Poland	51.76	22.51	2016	MT170044	/	/
Seq20	1PL_31_LCO_31	Culicoides obsoletus	611	Olszewnica	Poland	51.76	22.51	2016	MT170045	/	/
Seq21	1PL_34_LCO_34	Culicoides obsoletus	609	Olszewnica	Poland	51.76	22.51	2016	MT170046	/	/
Seq22	1PL_36_LCO_36	Culicoides obsoletus	613	Olszewnica	Poland	51.76	22.51	2016	MT170047	/	/
Seq23	1PL_40_LCO_40	Culicoides obsoletus	613	Olszewnica	Poland	51.76	22.51	2016	MT170048	/	/
Seq24	1PL_43_LCO_43	Culicoides obsoletus	610	Olszewnica	Poland	51.76	22.51	2016	MT170049	/	/
Seq25	1PL_44_LCO_44	Culicoides obsoletus	611	Olszewnica	Poland	51.76	22.51	2016	MT170050	/	/
Seq26	1PL_45_LCO_45	Culicoides obsoletus	611	Olszewnica	Poland	51.76	22.51	2016	MT170051	/	/
Seq27	20_MA002_D3_05	Culicoides montanus	601	Rabat	Morocco	33.96	-6.8	2010	MT170052	/	/
Seq28	20PL_01_LCO_1	Culicoides obsoletus	544	Pikulice	Poland	49.75	22.79	2016	MT170053	/	/
Seq29	20PL_02_LCO_2	Culicoides obsoletus clade O2	544	Pikulice	Poland	49.75	22.79	2016	MT170054	/	/
Seq30	20PL_03_LCO_3	Culicoides obsoletus clade O2	544	Pikulice	Poland	49.75	22.79	2016	MT170055	/	/
Seq31	20PL_04_LCO_4	Culicoides obsoletus	544	Pikulice	Poland	49.75	22.79	2016	MT170056	MT163075	MT175611
Seq32	20PL_05_LCO_5	Culicoides obsoletus	544	Pikulice	Poland	49.75	22.79	2016	MT170057	MT163076	MT175612
Seq33	20PL_06_LCO_6	Culicoides obsoletus	544	Pikulice	Poland	49.75	22.79	2016	MT170058	/	/
Seq34	20PL_07_LCO_7	Culicoides obsoletus	544	Pikulice	Poland	49.75	22.79	2016	MT170059	/	/
Seq35	20PL_08_LCO_8	Culicoides obsoletus clade O2	544	Pikulice	Poland	49.75	22.79	2016	MT170060	MT163077	MT175613
Seq36	20PL_11_LCO_11	Culicoides obsoletus	544	Pikulice	Poland	49.75	22.79	2016	MT170061	/	/
Seq37	20PL_12_LCO_12	Culicoides obsoletus clade O2	544	Pikulice	Poland	49.75	22.79	2016	MT170062	MT163078	MT175614
Seq38	20PL_13_LCO_13	Culicoides obsoletus clade O2	544	Pikulice	Poland	49.75	22.79	2016	MT170063	MT163079	MT175615
Seq39	20PL_14_LCO_14	Culicoides obsoletus	544	Pikulice	Poland	49.75	22.79	2016	MT170064	/	/
Seq40	20PL_15_LCO_15	Culicoides obsoletus	544	Pikulice	Poland	49.75	22.79	2016	MT170065	/	/
Seq41	20PL_16_LCO_16	Culicoides obsoletus clade O2	544	Pikulice	Poland	49.75	22.79	2016	MT170066	/	/
Seq42	20PL_17_LCO_17	Culicoides obsoletus clade O2	544	Pikulice	Poland	49.75	22.79	2016	MT170067	/	/
Seq43	20PL_18_LCO_18	Culicoides obsoletus	544	Pikulice	Poland	49.75	22.79	2016	MT170068	/	/
Seq44	20PL_19_LCO_19	Culicoides obsoletus	544	Pikulice	Poland	49.75	22.79	2016	MT170069	/	/
Seq45	20PL_21_LCO_21	Culicoides obsoletus	544	Pikulice	Poland	49.75	22.79	2016	MT170070	/	/
Seq46	20PL_22_LCO_22	Culicoides obsoletus	544	Pikulice	Poland	49.75	22.79	2016	MT170071	/	/
Seq47	20PL_23_LCO_23	Culicoides obsoletus	544	Pikulice	Poland	49.75	22.79	2016	MT170072	/	/
Seq48	20PL_24_LCO_24	Culicoides obsoletus	544	Pikulice	Poland	49.75	22.79	2016	MT170073	/	/
Seq49	20PL_25_LCO_25	Culicoides obsoletus	544	Pikulice	Poland	49.75	22.79	2016	MT170074	/	/
Seq50	21PL01_LCO_26	Culicoides obsoletus	534	Pikulice	Poland	49.75	22.79	2016	MT170075	/	/
Seq51	21PL02_LCO_27	Culicoides obsoletus clade O2	534	Pikulice	Poland	49.75	22.79	2016	MT170076	/	/
Seq52	21PL03_LCO_28	Culicoides obsoletus	534	Pikulice	Poland	49.75	22.79	2016	MT170077	/	/
Seq53	21PL04_LCO_29	Culicoides scoticus	534	Pikulice	Poland	49.75	22.79	2016	MT170078	MT163080	MT175616
Seq54	21PL05_LCO_30	Culicoides scoticus	534	Pikulice	Poland	49.75	22.79	2016	MT170079	MT163081	MT175617
Seq55	21PL06_LCO_31	Culicoides obsoletus	534	Pikulice	Poland	49.75	22.79	2016	MT170080	/	/
Seq56	21PL07_LCO_32	Culicoides obsoletus	534	Pikulice	Poland	49.75	22.79	2016	MT170081	/	/
Seq57	24_MA003_D1_02	Culicoides obsoletus	596	Rabat	Morocco	33.96	-6.8	2010	MT170082	/	/
Seq58	24PL01_LCO_33	Culicoides obsoletus	548	Pikulice	Poland	49.75	22.79	2016	MT170083	/	/
Seq59	24PL03_LCO_35	Culicoides obsoletus clade O2	548	Pikulice	Poland	49.75	22.79	2016	MT170084	MT163082	MT175618
Seq60	24PL04_LCO_36	Culicoides obsoletus	548	Pikulice	Poland	49.75	22.79	2016	MT170085	/	/
Seq61	24PL05_LCO_37	Culicoides obsoletus clade O2	548	Pikulice	Poland	49.75	22.79	2016	MT170086	/	/
Seq62	24PL07_LCO_39	Culicoides obsoletus clade O2	548	Pikulice	Poland	49.75	22.79	2016	MT170087	/	/
Seq63	24PL10_LCO_42	Culicoides obsoletus clade O2	548	Pikulice	Poland	49.75	22.79	2016	MT170088	/	/
Seq64	24PL11_LCO_43	Culicoides obsoletus clade O2	548	Pikulice	Poland	49.75	22.79	2016	MT170089	/	/
Seq65	24PL12_LCO_44	Culicoides obsoletus	548	Pikulice	Poland	49.75	22.79	2016	MT170090	/	/
Seq66	24PL13_LCO_45	Culicoides obsoletus clade O2	548	Pikulice	Poland	49.75	22.79	2016	MT170091	/	/
Seq67	25PL01_LCO_46	Culicoides obsoletus	528	Pikulice	Poland	49.75	22.79	2016	MT170092	/	/
Seq68	25PL02_LCO_47	Culicoides obsoletus	528	Pikulice	Poland	49.75	22.79	2016	MT170093	/	/
Seq69	25PL03_LCO_48	Culicoides obsoletus	528	Pikulice	Poland	49.75	22.79	2016	MT170094	/	/
Seq70	25PL04_LCO_49	Culicoides obsoletus clade O2	528	Pikulice	Poland	49.75	22.79	2016	MT170095	/	/
Seq71	25PL06_LCO_51	Culicoides obsoletus	528	Pikulice	Poland	49.75	22.79	2016	MT170096	/	/
Seq72	25PL07_LCO_52	Culicoides obsoletus	528	Pikulice	Poland	49.75	22.79	2016	MT170097	/	/
Seq73	25PL08_LCO_53	Culicoides obsoletus	528	Pikulice	Poland	49.75	22.79	2016	MT170098	/	/
Seq74	25PL09_LCO_54	Culicoides obsoletus	528	Pikulice	Poland	49.75	22.79	2016	MT170099	/	/
Seq75	25PL10_LCO_55	Culicoides obsoletus	528	Pikulice	Poland	49.75	22.79	2016	MT170100	/	/
Seq76	25PL11_LCO_56	Culicoides obsoletus clade O2	528	Pikulice	Poland	49.75	22.79	2016	MT170101	/	/
Seq77	25PL13_LCO_58	Culicoides obsoletus	528	Pikulice	Poland	49.75	22.79	2016	MT170102	/	/
Seq78	25PL15_LCO_60	Culicoides obsoletus	528	Pikulice	Poland	49.75	22.79	2016	MT170103	/	/
Seq79	25PL16_LCO_61	Culicoides obsoletus	528	Pikulice	Poland	49.75	22.79	2016	MT170104	/	/
Seq80	25PL17_LCO_62	Culicoides obsoletus	528	Pikulice	Poland	49.75	22.79	2016	MT170105	/	/
Seq81	25PL18_LCO_63	Culicoides obsoletus	528	Pikulice	Poland	49.75	22.79	2016	MT170106	/	/
Seq82	25PL19_LCO_64	Culicoides obsoletus	528	Pikulice	Poland	49.75	22.79	2016	MT170107	/	/
Seq83	25PL21_LCO_66	Culicoides obsoletus clade O2	528	Pikulice	Poland	49.75	22.79	2016	MT170108	/	/
Seq84	25PL22_LCO_67	Culicoides obsoletus	528	Pikulice	Poland	49.75	22.79	2016	MT170109	/	/
Seq85	25PL25_LCO_70	Culicoides obsoletus	528	Pikulice	Poland	49.75	22.79	2016	MT170110	/	/
Seq86	25PL26_LCO_71	Culicoides obsoletus clade O2	528	Pikulice	Poland	49.75	22.79	2016	MT170111	/	/
Seq87	25PL27_LCO_72	Culicoides obsoletus clade O2	528	Pikulice	Poland	49.75	22.79	2016	MT170112	/	/
Seq88	25PL28_LCO_73	Culicoides obsoletus clade O2	528	Pikulice	Poland	49.75	22.79	2016	MT170113	/	/
Seq89	25PL29_LCO_74	Culicoides obsoletus clade O2	528	Pikulice	Poland	49.75	22.79	2016	MT170114	/	/
Seq90	25PL30_LCO_75	Culicoides obsoletus clade O2	528	Pikulice	Poland	49.75	22.79	2016	MT170115	/	/
Seq91	25PL31_LCO_76	Culicoides obsoletus clade O2	528	Pikulice	Poland	49.75	22.79	2016	MT170116	/	/
Seq92	25PL32_LCO_77	Culicoides obsoletus	528	Pikulice	Poland	49.75	22.79	2016	MT170117	/	/
Seq93	27PL01_LCO_78	Culicoides obsoletus	543	Pikulice	Poland	49.75	22.79	2016	MT170118	/	/
Seq94	27PL02_LCO_79	Culicoides obsoletus	543	Pikulice	Poland	49.75	22.79	2016	MT170119	/	/
Seq95	27PL03_LCO_80	Culicoides obsoletus	543	Pikulice	Poland	49.75	22.79	2016	MT170120	/	/
Seq96	27PL04_LCO_81	Culicoides obsoletus	543	Pikulice	Poland	49.75	22.79	2016	MT170121	/	/
Seq97	27PL05_LCO_82	Culicoides obsoletus	543	Pikulice	Poland	49.75	22.79	2016	MT170122	/	/
Seq98	27PL06_LCO_83	Culicoides obsoletus	543	Pikulice	Poland	49.75	22.79	2016	MT170123	/	/
Seq99	27PL07_LCO_84	Culicoides obsoletus	543	Pikulice	Poland	49.75	22.79	2016	MT170124	/	/
Seq100	27PL08_LCO_85	Culicoides scoticus	543	Pikulice	Poland	49.75	22.79	2016	MT170125	MT163083	MT175619
Seq101	27PL09_LCO_86	Culicoides obsoletus	543	Pikulice	Poland	49.75	22.79	2016	MT170126	/	/
Seq102	27PL10_LCO_87	Culicoides obsoletus	543	Pikulice	Poland	49.75	22.79	2016	MT170127	/	/
Seq103	27PL11_LCO_88	Culicoides obsoletus	543	Pikulice	Poland	49.75	22.79	2016	MT170128	/	/
Seq104	27PL13_LCO_90	Culicoides obsoletus	543	Pikulice	Poland	49.75	22.79	2016	MT170129	/	/
Seq105	27PL14_LCO_91	Culicoides scoticus	543	Pikulice	Poland	49.75	22.79	2016	MT170130	/	/
Seq106	27PL15_LCO_92	Culicoides obsoletus	543	Pikulice	Poland	49.75	22.79	2016	MT170131	/	/
Seq107	35_MA003_D8_19	Culicoides obsoletus	613	Rabat	Morocco	33.96	-6.8	2010	MT170132	/	/
Seq108	41PL_01_LCO_49	Culicoides obsoletus clade O2	610	Wronka	Poland	54	21.68	2016	MT170133	/	/
Seq109	41PL_02_LCO_50	Culicoides obsoletus clade O2	608	Wronka	Poland	54	21.68	2016	MT170134	/	/
Seq110	41PL_03_LCO_51	Culicoides obsoletus clade O2	611	Wronka	Poland	54	21.68	2016	MT170135	/	/
Seq111	41PL_04_LCO_52	Culicoides obsoletus clade O2	610	Wronka	Poland	54	21.68	2016	MT170136	/	/
Seq112	41PL_05_LCO_53	Culicoides obsoletus clade O2	611	Wronka	Poland	54	21.68	2016	MT170137	/	/
Seq113	41PL_09_LCO_57	Culicoides obsoletus clade O2	610	Wronka	Poland	54	21.68	2016	MT170138	/	/
Seq114	41PL_10_LCO_58	Culicoides obsoletus clade O2	612	Wronka	Poland	54	21.68	2016	MT170139	/	/
Seq115	41PL_11_LCO_59	Culicoides obsoletus clade O2	613	Wronka	Poland	54	21.68	2016	MT170140	/	/
Seq116	41PL_12_LCO_60	Culicoides obsoletus clade O2	613	Wronka	Poland	54	21.68	2016	MT170141	/	/
Seq117	41PL_13_LCO_61	Culicoides obsoletus clade O2	613	Wronka	Poland	54	21.68	2016	MT170142	/	/
Seq118	41PL_15_LCO_63	Culicoides obsoletus clade O2	610	Wronka	Poland	54	21.68	2016	MT170143	/	/
Seq119	41PL_17_LCO_65	Culicoides obsoletus clade O2	615	Wronka	Poland	54	21.68	2016	MT170144	/	/
Seq120	41PL_19_LCO_67	Culicoides obsoletus clade O2	610	Wronka	Poland	54	21.68	2016	MT170145	/	/
Seq121	41PL_20_LCO_68	Culicoides obsoletus clade O2	610	Wronka	Poland	54	21.68	2016	MT170146	/	/
Seq122	41PL_21_LCO_69	Culicoides obsoletus clade O2	609	Wronka	Poland	54	21.68	2016	MT170147	/	/
Seq123	41PL_22_LCO_70	Culicoides obsoletus clade O2	608	Wronka	Poland	54	21.68	2016	MT170148	/	/
Seq124	41PL_25_LCO_73	Culicoides obsoletus clade O2	610	Wronka	Poland	54	21.68	2016	MT170149	/	/
Seq125	41PL_26_LCO_74	Culicoides obsoletus clade O2	613	Wronka	Poland	54	21.68	2016	MT170150	/	/
Seq126	41PL_27_LCO_75	Culicoides obsoletus clade O2	611	Wronka	Poland	54	21.68	2016	MT170151	/	/
Seq127	41PL_30_LCO_78	Culicoides obsoletus clade O2	611	Wronka	Poland	54	21.68	2016	MT170152	/	/
Seq128	41PL_31_LCO_79	Culicoides obsoletus clade O2	612	Wronka	Poland	54	21.68	2016	MT170153	/	/
Seq129	41PL_32_LCO_80	Culicoides obsoletus clade O2	613	Wronka	Poland	54	21.68	2016	MT170154	/	/
Seq130	41PL_33_LCO_81	Culicoides obsoletus clade O2	609	Wronka	Poland	54	21.68	2016	MT170155	/	/
Seq131	41PL_34_LCO_82	Culicoides obsoletus clade O2	612	Wronka	Poland	54	21.68	2016	MT170156	/	/
Seq132	41PL_35_LCO_83	Culicoides obsoletus clade O2	607	Wronka	Poland	54	21.68	2016	MT170157	/	/
Seq133	41PL_36_LCO_84	Culicoides obsoletus clade O2	614	Wronka	Poland	54	21.68	2016	MT170158	/	/
Seq134	41PL_37_LCO_85	Culicoides obsoletus clade O2	600	Wronka	Poland	54	21.68	2016	MT170159	/	/
Seq135	41PL_38_LCO_86	Culicoides obsoletus clade O2	612	Wronka	Poland	54	21.68	2016	MT170160	/	/
Seq136	41PL_39_LCO_87	Culicoides obsoletus clade O2	611	Wronka	Poland	54	21.68	2016	MT170161	/	/
Seq137	41PL_40_LCO_88	Culicoides obsoletus clade O2	612	Wronka	Poland	54	21.68	2016	MT170162	/	/
Seq138	41PL_41_LCO_89	Culicoides obsoletus clade O2	608	Wronka	Poland	54	21.68	2016	MT170163	/	/
Seq139	41PL_42_LCO_90	Culicoides obsoletus clade O2	613	Wronka	Poland	54	21.68	2016	MT170164	/	/
Seq140	41PL_43_LCO_91	Culicoides obsoletus clade O2	613	Wronka	Poland	54	21.68	2016	MT170165	/	/
Seq141	41PL_44_LCO_92	Culicoides obsoletus clade O2	613	Wronka	Poland	54	21.68	2016	MT170166	/	/
Seq142	41PL_45_LCO_93	Culicoides obsoletus clade O2	620	Wronka	Poland	54	21.68	2016	MT170167	/	/
Seq143	BG03_01_LCO_1	Culicoides obsoletus	614	Nikolovo	Bulgaria	43.8712	26.1153	2016	MT170168	/	/
Seq144	BG03_02_LCO_2	Culicoides obsoletus	613	Nikolovo	Bulgaria	43.8712	26.1153	2016	MT170169	/	/
Seq145	BG03_03_LCO_3	Culicoides obsoletus	613	Nikolovo	Bulgaria	43.8712	26.1153	2016	MT170170	/	/
Seq146	BG03_04_LCO_4	Culicoides scoticus	540	Nikolovo	Bulgaria	43.8712	26.1153	2016	MT170171	/	/
Seq147	BG03_05_LCO_5	Culicoides obsoletus	613	Nikolovo	Bulgaria	43.8712	26.1153	2016	MT170172	/	/
Seq148	BG03_06_LCO_6	Culicoides obsoletus	612	Nikolovo	Bulgaria	43.8712	26.1153	2016	MT170173	/	/
Seq149	BG03_07_LCO_7	Culicoides obsoletus	613	Nikolovo	Bulgaria	43.8712	26.1153	2016	MT170174	/	/
Seq150	BG03_08_LCO_8	Culicoides scoticus	620	Nikolovo	Bulgaria	43.8712	26.1153	2016	MT170175	/	/
Seq151	BG03_09_LCO_9	Culicoides obsoletus	611	Nikolovo	Bulgaria	43.8712	26.1153	2016	MT170176	/	/
Seq152	BG03_10_LCO_10	Culicoides obsoletus	611	Nikolovo	Bulgaria	43.8712	26.1153	2016	MT170177	/	/
Seq153	BG03_11_LCO_11	Culicoides scoticus	540	Nikolovo	Bulgaria	43.8712	26.1153	2016	MT170178	/	/
Seq154	BG03_12_LCO_12	Culicoides obsoletus	611	Nikolovo	Bulgaria	43.8712	26.1153	2016	MT170179	/	/
Seq155	BG03_13_LCO_13	Culicoides obsoletus	610	Nikolovo	Bulgaria	43.8712	26.1153	2016	MT170180	/	/
Seq156	BG03_14_LCO_14	Culicoides obsoletus	613	Nikolovo	Bulgaria	43.8712	26.1153	2016	MT170181	/	/
Seq157	BG03_15_LCO_15	Culicoides scoticus	613	Nikolovo	Bulgaria	43.8712	26.1153	2016	MT170182	/	/
Seq158	BG03_16_LCO_16	Culicoides obsoletus	610	Nikolovo	Bulgaria	43.8712	26.1153	2016	MT170183	/	/
Seq159	BG03_17_LCO_17	Culicoides obsoletus	613	Nikolovo	Bulgaria	43.8712	26.1153	2016	MT170184	/	/
Seq160	BG03_19_LCO_19	Culicoides obsoletus	613	Nikolovo	Bulgaria	43.8712	26.1153	2016	MT170185	/	/
Seq161	BG03_20_LCO_20	Culicoides obsoletus	610	Nikolovo	Bulgaria	43.8712	26.1153	2016	MT170186	/	/
Seq162	BG03_21_LCO_21	Culicoides obsoletus	611	Nikolovo	Bulgaria	43.8712	26.1153	2016	MT170187	/	/
Seq163	BG03_22_LCO_22	Culicoides obsoletus	611	Nikolovo	Bulgaria	43.8712	26.1153	2016	MT170188	/	/
Seq164	BG03_23_LCO_23	Culicoides scoticus	607	Nikolovo	Bulgaria	43.8712	26.1153	2016	MT170189	/	/
Seq165	BG03_24_LCO_24	Culicoides obsoletus	610	Nikolovo	Bulgaria	43.8712	26.1153	2016	MT170190	/	/
Seq166	BG03_25_LCO_25	Culicoides obsoletus	611	Nikolovo	Bulgaria	43.8712	26.1153	2016	MT170191	/	/
Seq167	BG03_26_LCO_26	Culicoides obsoletus	613	Nikolovo	Bulgaria	43.8712	26.1153	2016	MT170192	/	/
Seq168	BG03_27_LCO_27	Culicoides obsoletus	613	Nikolovo	Bulgaria	43.8712	26.1153	2016	MT170193	/	/
Seq169	BG03_28_LCO_28	Culicoides obsoletus	613	Nikolovo	Bulgaria	43.8712	26.1153	2016	MT170194	/	/
Seq170	BG03_30_LCO_30	Culicoides obsoletus	613	Nikolovo	Bulgaria	43.8712	26.1153	2016	MT170195	/	/
Seq171	BG03_32_LCO_32	Culicoides obsoletus	613	Nikolovo	Bulgaria	43.8712	26.1153	2016	MT170196	/	/
Seq172	BG04_01_LCO_33	Culicoides obsoletus	611	Montana	Bulgaria	43.41	23.23	2016	MT170197	/	/
Seq173	BG04_02_LCO_34	Culicoides scoticus	613	Montana	Bulgaria	43.41	23.23	2016	MT170198	/	/
Seq174	BG04_03_LCO_35	Culicoides obsoletus	610	Montana	Bulgaria	43.41	23.23	2016	MT170199	/	/
Seq175	BG04_04_LCO_36	Culicoides obsoletus	613	Montana	Bulgaria	43.41	23.23	2016	MT170200	/	/
Seq176	BG04_05_LCO_37	Culicoides obsoletus	611	Montana	Bulgaria	43.41	23.23	2016	MT170201	/	/
Seq177	BG04_06_LCO_38	Culicoides obsoletus	611	Montana	Bulgaria	43.41	23.23	2016	MT170202	/	/
Seq178	BG04_07_LCO_39	Culicoides obsoletus	611	Montana	Bulgaria	43.41	23.23	2016	MT170203	/	/
Seq179	BG04_08_LCO_40	Culicoides obsoletus	611	Montana	Bulgaria	43.41	23.23	2016	MT170204	/	/
Seq180	BG04_09_LCO_41	Culicoides obsoletus	611	Montana	Bulgaria	43.41	23.23	2016	MT170205	/	/
Seq181	BG04_10_LCO_42	Culicoides obsoletus	613	Montana	Bulgaria	43.41	23.23	2016	MT170206	/	/
Seq182	BG04_11_LCO_43	Culicoides obsoletus	613	Montana	Bulgaria	43.41	23.23	2016	MT170207	/	/
Seq183	BG04_12_LCO_44	Culicoides obsoletus	613	Montana	Bulgaria	43.41	23.23	2016	MT170208	/	/
Seq184	BG04_13_LCO_45	Culicoides obsoletus	611	Montana	Bulgaria	43.41	23.23	2016	MT170209	/	/
Seq185	BG04_14_LCO_46	Culicoides obsoletus	616	Montana	Bulgaria	43.41	23.23	2016	MT170210	/	/
Seq186	BG04_15_LCO_47	Culicoides obsoletus	610	Montana	Bulgaria	43.41	23.23	2016	MT170211	/	/
Seq187	BG04_16_LCO_48	Culicoides obsoletus	611	Montana	Bulgaria	43.41	23.23	2016	MT170212	/	/
Seq188	BG04_17_LCO_49	Culicoides obsoletus	609	Montana	Bulgaria	43.41	23.23	2016	MT170213	/	/
Seq189	BG04_18_LCO_50	Culicoides obsoletus	611	Montana	Bulgaria	43.41	23.23	2016	MT170214	/	/
Seq190	BG04_19_LCO_51	Culicoides obsoletus	611	Montana	Bulgaria	43.41	23.23	2016	MT170215	/	/
Seq191	BG04_20_LCO_52	Culicoides obsoletus	611	Montana	Bulgaria	43.41	23.23	2016	MT170216	/	/
Seq192	BG04_21_LCO_53	Culicoides obsoletus	611	Montana	Bulgaria	43.41	23.23	2016	MT170217	/	/
Seq193	BG04_22_LCO_54	Culicoides obsoletus	611	Montana	Bulgaria	43.41	23.23	2016	MT170218	/	/
Seq194	BG04_23_LCO_55	Culicoides obsoletus	611	Montana	Bulgaria	43.41	23.23	2016	MT170219	/	/
Seq195	BG04_24_LCO_56	Culicoides obsoletus	610	Montana	Bulgaria	43.41	23.23	2016	MT170220	/	/
Seq196	BG04_25_LCO_57	Culicoides obsoletus	611	Montana	Bulgaria	43.41	23.23	2016	MT170221	/	/
Seq197	BG04_26_LCO_58	Culicoides obsoletus	611	Montana	Bulgaria	43.41	23.23	2016	MT170222	/	/
Seq198	BG04_27_LCO_59	Culicoides obsoletus	611	Montana	Bulgaria	43.41	23.23	2016	MT170223	/	/
Seq199	BG04_28_LCO_60	Culicoides obsoletus	612	Montana	Bulgaria	43.41	23.23	2016	MT170224	/	/
Seq200	BG04_29_LCO_61	Culicoides obsoletus	613	Montana	Bulgaria	43.41	23.23	2016	MT170225	/	/
Seq201	BG04_30_LCO_62	Culicoides obsoletus	610	Montana	Bulgaria	43.41	23.23	2016	MT170226	/	/
Seq202	BG04_31_LCO_63	Culicoides obsoletus	613	Montana	Bulgaria	43.41	23.23	2016	MT170227	/	/
Seq203	BG04_32_LCO_64	Culicoides obsoletus	610	Montana	Bulgaria	43.41	23.23	2016	MT170228	/	/
Seq204	BG07_01_LCO_65	Culicoides obsoletus	611	Nikolovo	Bulgaria	43.8712	26.1153	2016	MT170229	/	/
Seq205	BG07_02_LCO_66	Culicoides montanus	611	Nikolovo	Bulgaria	43.8712	26.1153	2016	MT170230	/	/
Seq206	BG07_03_LCO_67	Culicoides obsoletus	611	Nikolovo	Bulgaria	43.8712	26.1153	2016	MT170231	/	/
Seq207	BG07_04_LCO_68	Culicoides scoticus	611	Nikolovo	Bulgaria	43.8712	26.1153	2016	MT170232	/	/
Seq208	BG07_05_LCO_69	Culicoides obsoletus	611	Nikolovo	Bulgaria	43.8712	26.1153	2016	MT170233	/	/
Seq209	BG07_06_LCO_70	Culicoides obsoletus	611	Nikolovo	Bulgaria	43.8712	26.1153	2016	MT170234	/	/
Seq210	BG07_07_LCO_71	Culicoides obsoletus	611	Nikolovo	Bulgaria	43.8712	26.1153	2016	MT170235	/	/
Seq211	BG07_08_LCO_72	Culicoides obsoletus	613	Nikolovo	Bulgaria	43.8712	26.1153	2016	MT170236	/	/
Seq212	BG07_09_LCO_73	Culicoides montanus	613	Nikolovo	Bulgaria	43.8712	26.1153	2016	MT170237	/	/
Seq213	BG07_10_LCO_74	Culicoides obsoletus	611	Nikolovo	Bulgaria	43.8712	26.1153	2016	MT170238	/	/
Seq214	BG08_01_LCO_76	Culicoides obsoletus	610	Montana	Bulgaria	43.41	23.23	2016	MT170239	/	/
Seq215	BG08_02_LCO_77	Culicoides obsoletus	611	Montana	Bulgaria	43.41	23.23	2016	MT170240	/	/
Seq216	BG08_03_LCO_78	Culicoides obsoletus	611	Montana	Bulgaria	43.41	23.23	2016	MT170241	/	/
Seq217	BG08_04_LCO_79	Culicoides scoticus	613	Montana	Bulgaria	43.41	23.23	2016	MT170242	/	/
Seq218	BG08_05_LCO_80	Culicoides obsoletus	613	Montana	Bulgaria	43.41	23.23	2016	MT170243	/	/
Seq219	BG08_06_LCO_81	Culicoides obsoletus	611	Montana	Bulgaria	43.41	23.23	2016	MT170244	/	/
Seq220	BG08_07_LCO_82	Culicoides obsoletus	610	Montana	Bulgaria	43.41	23.23	2016	MT170245	/	/
Seq221	BG08_08_LCO_83	Culicoides obsoletus	610	Montana	Bulgaria	43.41	23.23	2016	MT170246	/	/
Seq222	BG11_01_LCO_84	Culicoides obsoletus	612	Nikolovo	Bulgaria	43.8712	26.1153	2016	MT170247	/	/
Seq223	BG11_02_LCO_85	Culicoides obsoletus	611	Nikolovo	Bulgaria	43.8712	26.1153	2016	MT170248	/	/
Seq224	BG11_03_LCO_86	Culicoides obsoletus	605	Nikolovo	Bulgaria	43.8712	26.1153	2016	MT170249	/	/
Seq225	BG11_04_LCO_87	Culicoides obsoletus	611	Nikolovo	Bulgaria	43.8712	26.1153	2016	MT170250	/	/
Seq226	BG11_05_LCO_88	Culicoides obsoletus	611	Nikolovo	Bulgaria	43.8712	26.1153	2016	MT170251	/	/
Seq227	BG11_07_LCO_90	Culicoides obsoletus	611	Nikolovo	Bulgaria	43.8712	26.1153	2016	MT170252	/	/
Seq228	BG11_08_LCO_91	Culicoides scoticus	613	Nikolovo	Bulgaria	43.8712	26.1153	2016	MT170253	/	/
Seq229	BG11_09_LCO_92	Culicoides obsoletus	611	Nikolovo	Bulgaria	43.8712	26.1153	2016	MT170254	/	/
Seq230	BG11_10_LCO_93	Culicoides obsoletus	611	Nikolovo	Bulgaria	43.8712	26.1153	2016	MT170255	/	/
Seq231	BG11_11_LCO_94	Culicoides obsoletus	613	Nikolovo	Bulgaria	43.8712	26.1153	2016	MT170256	/	/
Seq232	BG11_12_LCO_1	Culicoides obsoletus	613	Nikolovo	Bulgaria	43.8712	26.1153	2016	MT170257	/	/
Seq233	BG11_13_LCO_2	Culicoides scoticus	613	Nikolovo	Bulgaria	43.8712	26.1153	2016	MT170258	/	/
Seq234	BG11_14_LCO_3	Culicoides scoticus	611	Nikolovo	Bulgaria	43.8712	26.1153	2016	MT170259	/	/
Seq235	BG11_15_LCO_4	Culicoides obsoletus	613	Nikolovo	Bulgaria	43.8712	26.1153	2016	MT170260	/	/
Seq236	BG11_16_LCO_5	Culicoides obsoletus	614	Nikolovo	Bulgaria	43.8712	26.1153	2016	MT170261	/	/
Seq237	BG11_17_LCO_6	Culicoides obsoletus	613	Nikolovo	Bulgaria	43.8712	26.1153	2016	MT170262	/	/
Seq238	BG11_18_LCO_7	Culicoides obsoletus	613	Nikolovo	Bulgaria	43.8712	26.1153	2016	MT170263	/	/
Seq239	BG11_20_LCO_9	Culicoides scoticus	613	Nikolovo	Bulgaria	43.8712	26.1153	2016	MT170264	/	/
Seq240	BG11_21_LCO_10	Culicoides scoticus	613	Nikolovo	Bulgaria	43.8712	26.1153	2016	MT170265	/	/
Seq241	BG11_22_LCO_11	Culicoides obsoletus	613	Nikolovo	Bulgaria	43.8712	26.1153	2016	MT170266	/	/
Seq242	BG11_23_LCO_12	Culicoides obsoletus	613	Nikolovo	Bulgaria	43.8712	26.1153	2016	MT170267	/	/
Seq243	BG11_24_LCO_13	Culicoides obsoletus	613	Nikolovo	Bulgaria	43.8712	26.1153	2016	MT170268	/	/
Seq244	BG11_25_LCO_14	Culicoides obsoletus	613	Nikolovo	Bulgaria	43.8712	26.1153	2016	MT170269	/	/
Seq245	BG11_26_LCO_15	Culicoides obsoletus	613	Nikolovo	Bulgaria	43.8712	26.1153	2016	MT170270	/	/
Seq246	BG11_27_LCO_16	Culicoides obsoletus	614	Nikolovo	Bulgaria	43.8712	26.1153	2016	MT170271	/	/
Seq247	BG11_28_LCO_17	Culicoides scoticus	608	Nikolovo	Bulgaria	43.8712	26.1153	2016	MT170272	/	/
Seq248	BG11_29_LCO_18	Culicoides obsoletus	613	Nikolovo	Bulgaria	43.8712	26.1153	2016	MT170273	/	/
Seq249	BG11_30_LCO_19	Culicoides obsoletus	613	Nikolovo	Bulgaria	43.8712	26.1153	2016	MT170274	/	/
Seq250	BG11_31_LCO_20	Culicoides obsoletus	613	Nikolovo	Bulgaria	43.8712	26.1153	2016	MT170275	/	/
Seq251	BG11_32_LCO_21	Culicoides obsoletus	613	Nikolovo	Bulgaria	43.8712	26.1153	2016	MT170276	/	/
Seq252	BG11_33_LCO_22	Culicoides obsoletus	614	Nikolovo	Bulgaria	43.8712	26.1153	2016	MT170277	/	/
Seq253	BG11_34_LCO_23	Culicoides obsoletus	613	Nikolovo	Bulgaria	43.8712	26.1153	2016	MT170278	/	/
Seq254	BG11_35_LCO_24	Culicoides obsoletus	612	Nikolovo	Bulgaria	43.8712	26.1153	2016	MT170279	/	/
Seq255	BG12_01_LCO_25	Culicoides obsoletus	613	Montana	Bulgaria	43.41	23.23	2016	MT170280	/	/
Seq256	BG12_02_LCO_26	Culicoides obsoletus	613	Montana	Bulgaria	43.41	23.23	2016	MT170281	/	/
Seq257	BG12_03_LCO_27	Culicoides scoticus	613	Montana	Bulgaria	43.41	23.23	2016	MT170282	/	/
Seq258	BG12_04_LCO_28	Culicoides obsoletus	612	Montana	Bulgaria	43.41	23.23	2016	MT170283	/	/
Seq259	BG12_05_LCO_29	Culicoides scoticus	612	Montana	Bulgaria	43.41	23.23	2016	MT170284	/	/
Seq260	BG12_06_LCO_30	Culicoides obsoletus	613	Montana	Bulgaria	43.41	23.23	2016	MT170285	/	/
Seq261	BG12_07_LCO_31	Culicoides obsoletus	613	Montana	Bulgaria	43.41	23.23	2016	MT170286	/	/
Seq262	BG12_08_LCO_32	Culicoides obsoletus	613	Montana	Bulgaria	43.41	23.23	2016	MT170287	/	/
Seq263	BG12_09_LCO_33	Culicoides obsoletus	613	Montana	Bulgaria	43.41	23.23	2016	MT170288	/	/
Seq264	BG12_10_LCO_34	Culicoides obsoletus	610	Montana	Bulgaria	43.41	23.23	2016	MT170289	/	/
Seq265	BG12_11_LCO_35	Culicoides scoticus	608	Montana	Bulgaria	43.41	23.23	2016	MT170290	/	/
Seq266	BG12_12_LCO_36	Culicoides scoticus	613	Montana	Bulgaria	43.41	23.23	2016	MT170291	/	/
Seq267	BG12_13_LCO_37	Culicoides obsoletus	613	Montana	Bulgaria	43.41	23.23	2016	MT170292	/	/
Seq268	BG12_15_LCO_39	Culicoides obsoletus	613	Montana	Bulgaria	43.41	23.23	2016	MT170293	/	/
Seq269	BG12_16_LCO_40	Culicoides obsoletus	614	Montana	Bulgaria	43.41	23.23	2016	MT170294	/	/
Seq270	BG12_17_LCO_41	Culicoides obsoletus	613	Montana	Bulgaria	43.41	23.23	2016	MT170295	/	/
Seq271	BG12_18_LCO_42	Culicoides obsoletus	613	Montana	Bulgaria	43.41	23.23	2016	MT170296	/	/
Seq272	BG12_19_LCO_43	Culicoides obsoletus	612	Montana	Bulgaria	43.41	23.23	2016	MT170297	/	/
Seq273	BG12_20_LCO_44	Culicoides obsoletus	613	Montana	Bulgaria	43.41	23.23	2016	MT170298	/	/
Seq274	BG12_21_LCO_45	Culicoides scoticus	613	Montana	Bulgaria	43.41	23.23	2016	MT170299	/	/
Seq275	BG12_22_LCO_46	Culicoides obsoletus	613	Montana	Bulgaria	43.41	23.23	2016	MT170300	/	/
Seq276	BG12_23_LCO_47	Culicoides obsoletus	612	Montana	Bulgaria	43.41	23.23	2016	MT170301	MT163084	MT175620
Seq277	BG12_24_LCO_48	Culicoides obsoletus	613	Montana	Bulgaria	43.41	23.23	2016	MT170302	/	/
Seq278	BG12_27_LCO_51	Culicoides scoticus	613	Montana	Bulgaria	43.41	23.23	2016	MT170303	/	/
Seq279	BG12_28_LCO_52	Culicoides obsoletus	613	Montana	Bulgaria	43.41	23.23	2016	MT170304	/	/
Seq280	BG12_29_LCO_53	Culicoides obsoletus	613	Montana	Bulgaria	43.41	23.23	2016	MT170305	/	/
Seq281	BG12_30_LCO_54	Culicoides obsoletus	612	Montana	Bulgaria	43.41	23.23	2016	MT170306	/	/
Seq282	BG12_31_LCO_55	Culicoides obsoletus	614	Montana	Bulgaria	43.41	23.23	2016	MT170307	/	/
Seq283	BG15_04_LCO_60	Culicoides obsoletus	613	Nikolovo	Bulgaria	43.8712	26.1153	2016	MT170308	/	/
Seq284	BG15_05_LCO_61	Culicoides obsoletus	613	Nikolovo	Bulgaria	43.8712	26.1153	2016	MT170309	/	/
Seq285	BG15_06_LCO_62	Culicoides obsoletus	613	Nikolovo	Bulgaria	43.8712	26.1153	2016	MT170310	/	/
Seq286	BG15_07_LCO_63	Culicoides obsoletus	613	Nikolovo	Bulgaria	43.8712	26.1153	2016	MT170311	/	/
Seq287	BG15_11_LCO_67	Culicoides obsoletus	609	Nikolovo	Bulgaria	43.8712	26.1153	2016	MT170312	/	/
Seq288	BG15_12_LCO_68	Culicoides obsoletus	613	Nikolovo	Bulgaria	43.8712	26.1153	2016	MT170313	/	/
Seq289	BG15_14_LCO_70	Culicoides obsoletus	613	Nikolovo	Bulgaria	43.8712	26.1153	2016	MT170314	/	/
Seq290	BG15_15_LCO_71	Culicoides obsoletus	613	Nikolovo	Bulgaria	43.8712	26.1153	2016	MT170315	/	/
Seq291	BG15_18_LCO_74	Culicoides obsoletus	613	Nikolovo	Bulgaria	43.8712	26.1153	2016	MT170316	/	/
Seq292	BG15_19_LCO_75	Culicoides obsoletus	613	Nikolovo	Bulgaria	43.8712	26.1153	2016	MT170317	/	/
Seq293	BG15_20_LCO_76	Culicoides obsoletus	613	Nikolovo	Bulgaria	43.8712	26.1153	2016	MT170318	/	/
Seq294	BG15_21_LCO_77	Culicoides obsoletus	613	Nikolovo	Bulgaria	43.8712	26.1153	2016	MT170319	/	/
Seq295	BG15_22_LCO_78	Culicoides obsoletus	613	Nikolovo	Bulgaria	43.8712	26.1153	2016	MT170320	/	/
Seq296	BG15_23_LCO_79	Culicoides obsoletus	613	Nikolovo	Bulgaria	43.8712	26.1153	2016	MT170321	/	/
Seq297	BG15_24_LCO_80	Culicoides scoticus	611	Nikolovo	Bulgaria	43.8712	26.1153	2016	MT170322	/	/
Seq298	BG15_26_LCO_82	Culicoides obsoletus	613	Nikolovo	Bulgaria	43.8712	26.1153	2016	MT170323	/	/
Seq299	BG15_27_LCO_83	Culicoides obsoletus	612	Nikolovo	Bulgaria	43.8712	26.1153	2016	MT170324	/	/
Seq300	BG15_28_LCO_84	Culicoides obsoletus	613	Nikolovo	Bulgaria	43.8712	26.1153	2016	MT170325	/	/
Seq301	BG15_29_LCO_85	Culicoides obsoletus	613	Nikolovo	Bulgaria	43.8712	26.1153	2016	MT170326	/	/
Seq302	BG15_30_LCO_86	Culicoides obsoletus	613	Nikolovo	Bulgaria	43.8712	26.1153	2016	MT170327	/	/
Seq303	BG15_31_LCO_87	Culicoides obsoletus	613	Nikolovo	Bulgaria	43.8712	26.1153	2016	MT170328	/	/
Seq304	BG15_32_LCO_88	Culicoides obsoletus	613	Nikolovo	Bulgaria	43.8712	26.1153	2016	MT170329	/	/
Seq305	BG16_02_LCO_28	Culicoides obsoletus	613	Montana	Bulgaria	43.41	23.23	2016	MT170330	/	/
Seq306	BG16_03_LCO_29	Culicoides obsoletus	613	Montana	Bulgaria	43.41	23.23	2016	MT170331	/	/
Seq307	BG16_04_LCO_30	Culicoides obsoletus	612	Montana	Bulgaria	43.41	23.23	2016	MT170332	/	/
Seq308	BG16_06_LCO_32	Culicoides obsoletus	611	Montana	Bulgaria	43.41	23.23	2016	MT170333	/	/
Seq309	BG16_07_LCO_33	Culicoides obsoletus	613	Montana	Bulgaria	43.41	23.23	2016	MT170334	/	/
Seq310	BG16_08_LCO_34	Culicoides obsoletus	613	Montana	Bulgaria	43.41	23.23	2016	MT170335	/	/
Seq311	BG16_09_LCO_35	Culicoides obsoletus	613	Montana	Bulgaria	43.41	23.23	2016	MT170336	/	/
Seq312	BG16_10_LCO_36	Culicoides obsoletus	613	Montana	Bulgaria	43.41	23.23	2016	MT170337	MT163085	MT175621
Seq313	BG16_11_LCO_37	Culicoides obsoletus	613	Montana	Bulgaria	43.41	23.23	2016	MT170338	/	/
Seq314	BG16_12_LCO_38	Culicoides obsoletus	613	Montana	Bulgaria	43.41	23.23	2016	MT170339	/	/
Seq315	BG16_13_LCO_39	Culicoides obsoletus	613	Montana	Bulgaria	43.41	23.23	2016	MT170340	/	/
Seq316	BG16_14_LCO_40	Culicoides obsoletus	613	Montana	Bulgaria	43.41	23.23	2016	MT170341	/	/
Seq317	BG16_15_LCO_41	Culicoides obsoletus	615	Montana	Bulgaria	43.41	23.23	2016	MT170342	/	/
Seq318	BG16_17_LCO_43	Culicoides obsoletus	610	Montana	Bulgaria	43.41	23.23	2016	MT170343	/	/
Seq319	BG16_18_LCO_44	Culicoides obsoletus	612	Montana	Bulgaria	43.41	23.23	2016	MT170344	/	/
Seq320	BG16_19_LCO_45	Culicoides obsoletus	613	Montana	Bulgaria	43.41	23.23	2016	MT170345	/	/
Seq321	BG16_20_LCO_46	Culicoides obsoletus	610	Montana	Bulgaria	43.41	23.23	2016	MT170346	/	/
Seq322	BG16_21_LCO_47	Culicoides obsoletus	613	Montana	Bulgaria	43.41	23.23	2016	MT170347	/	/
Seq323	BG16_22_LCO_48	Culicoides obsoletus	611	Montana	Bulgaria	43.41	23.23	2016	MT170348	/	/
Seq324	BG16_23_LCO_49	Culicoides obsoletus	614	Montana	Bulgaria	43.41	23.23	2016	MT170349	/	/
Seq325	BG16_24_LCO_50	Culicoides obsoletus	613	Montana	Bulgaria	43.41	23.23	2016	MT170350	/	/
Seq326	BG16_25_LCO_51	Culicoides obsoletus	613	Montana	Bulgaria	43.41	23.23	2016	MT170351	/	/
Seq327	BG16_26_LCO_52	Culicoides obsoletus	613	Montana	Bulgaria	43.41	23.23	2016	MT170352	/	/
Seq328	BG16_27_LCO_53	Culicoides obsoletus	611	Montana	Bulgaria	43.41	23.23	2016	MT170353	/	/
Seq329	BG16_28_LCO_54	Culicoides obsoletus	613	Montana	Bulgaria	43.41	23.23	2016	MT170354	/	/
Seq330	BG16_29_LCO_55	Culicoides obsoletus	613	Montana	Bulgaria	43.41	23.23	2016	MT170355	/	/
Seq331	BG19_01_LCO_1	Culicoides obsoletus	613	Nikolovo	Bulgaria	43.8712	26.1153	2016	MT170356	/	/
Seq332	BG20_01_LCO_2	Culicoides obsoletus	611	Montana	Bulgaria	43.41	23.23	2016	MT170357	/	/
Seq333	BG20_02_LCO_3	Culicoides obsoletus	613	Montana	Bulgaria	43.41	23.23	2016	MT170358	/	/
Seq334	BG23_01_LCO_4	Culicoides obsoletus	613	Nikolovo	Bulgaria	43.8712	26.1153	2016	MT170359	/	/
Seq335	BG23_02_LCO_5	Culicoides obsoletus	613	Nikolovo	Bulgaria	43.8712	26.1153	2016	MT170360	/	/
Seq336	BG23_03_LCO_6	Culicoides obsoletus	613	Nikolovo	Bulgaria	43.8712	26.1153	2016	MT170361	/	/
Seq337	BG23_04_LCO_7	Culicoides obsoletus	603	Nikolovo	Bulgaria	43.8712	26.1153	2016	MT170362	/	/
Seq338	BG23_05_LCO_8	Culicoides obsoletus	613	Nikolovo	Bulgaria	43.8712	26.1153	2016	MT170363	/	/
Seq339	BG23_07_LCO_10	Culicoides obsoletus	613	Nikolovo	Bulgaria	43.8712	26.1153	2016	MT170364	/	/
Seq340	BG23_08_LCO_11	Culicoides obsoletus	613	Nikolovo	Bulgaria	43.8712	26.1153	2016	MT170365	/	/
Seq341	BG23_09_LCO_12	Culicoides obsoletus	613	Nikolovo	Bulgaria	43.8712	26.1153	2016	MT170366	/	/
Seq342	BG23_10_LCO_13	Culicoides obsoletus	611	Nikolovo	Bulgaria	43.8712	26.1153	2016	MT170367	/	/
Seq343	BG23_11_LCO_14	Culicoides obsoletus	613	Nikolovo	Bulgaria	43.8712	26.1153	2016	MT170368	/	/
Seq344	BG23_12_LCO_15	Culicoides obsoletus	613	Nikolovo	Bulgaria	43.8712	26.1153	2016	MT170369	/	/
Seq345	BG23_13_LCO_16	Culicoides scoticus	611	Nikolovo	Bulgaria	43.8712	26.1153	2016	MT170370	/	/
Seq346	BG23_14_LCO_17	Culicoides obsoletus	613	Nikolovo	Bulgaria	43.8712	26.1153	2016	MT170371	/	/
Seq347	BG23_15_LCO_18	Culicoides obsoletus	613	Nikolovo	Bulgaria	43.8712	26.1153	2016	MT170372	/	/
Seq348	BG23_16_LCO_19	Culicoides obsoletus	613	Nikolovo	Bulgaria	43.8712	26.1153	2016	MT170373	/	/
Seq349	BG23_17_LCO_20	Culicoides obsoletus	613	Nikolovo	Bulgaria	43.8712	26.1153	2016	MT170374	/	/
Seq350	BG23_19_LCO_22	Culicoides obsoletus	613	Nikolovo	Bulgaria	43.8712	26.1153	2016	MT170375	/	/
Seq351	BG23_22_LCO_25	Culicoides obsoletus	613	Nikolovo	Bulgaria	43.8712	26.1153	2016	MT170376	/	/
Seq352	BG23_23_LCO_26	Culicoides obsoletus	613	Nikolovo	Bulgaria	43.8712	26.1153	2016	MT170377	/	/
Seq353	BG24_02_LCO_90	Culicoides obsoletus	613	Montana	Bulgaria	43.41	23.23	2016	MT170378	/	/
Seq354	BG24_03_LCO_91	Culicoides obsoletus	613	Montana	Bulgaria	43.41	23.23	2016	MT170379	/	/
Seq355	BG24_04_LCO_92	Culicoides obsoletus	612	Montana	Bulgaria	43.41	23.23	2016	MT170380	MT163086	MT175622
Seq356	BG24_05_LCO_93	Culicoides obsoletus	612	Montana	Bulgaria	43.41	23.23	2016	MT170381	/	/
Seq357	BG24_06_LCO_94	Culicoides obsoletus	614	Montana	Bulgaria	43.41	23.23	2016	MT170382	/	/
Seq358	BG27_02_LCO_2	Culicoides obsoletus	613	Nikolovo	Bulgaria	43.8712	26.1153	2016	MT170383	/	/
Seq359	BG27_04_LCO_4	Culicoides obsoletus	613	Nikolovo	Bulgaria	43.8712	26.1153	2016	MT170384	/	/
Seq360	BG28_01_LCO_5	Culicoides obsoletus	613	Montana	Bulgaria	43.41	23.23	2016	MT170385	/	/
Seq361	BG31_01_LCO_9	Culicoides obsoletus	613	Nikolovo	Bulgaria	43.8712	26.1153	2016	MT170386	/	/
Seq362	BG31_02_LCO_10	Culicoides obsoletus	613	Nikolovo	Bulgaria	43.8712	26.1153	2016	MT170387	/	/
Seq363	BG31_03_LCO_11	Culicoides obsoletus	614	Nikolovo	Bulgaria	43.8712	26.1153	2016	MT170388	/	/
Seq364	BG31_04_LCO_12	Culicoides obsoletus	613	Nikolovo	Bulgaria	43.8712	26.1153	2016	MT170389	/	/
Seq365	BG31_05_LCO_13	Culicoides obsoletus	613	Nikolovo	Bulgaria	43.8712	26.1153	2016	MT170390	/	/
Seq366	BG31_06_LCO_14	Culicoides obsoletus	613	Nikolovo	Bulgaria	43.8712	26.1153	2016	MT170391	/	/
Seq367	BG31_07_LCO_15	Culicoides obsoletus	613	Nikolovo	Bulgaria	43.8712	26.1153	2016	MT170392	/	/
Seq368	BG31_08_LCO_16	Culicoides obsoletus	613	Nikolovo	Bulgaria	43.8712	26.1153	2016	MT170393	/	/
Seq369	BG31_09_LCO_17	Culicoides obsoletus	613	Nikolovo	Bulgaria	43.8712	26.1153	2016	MT170394	/	/
Seq370	BG31_10_LCO_18	Culicoides obsoletus	613	Nikolovo	Bulgaria	43.8712	26.1153	2016	MT170395	/	/
Seq371	BG31_11_LCO_19	Culicoides obsoletus	614	Nikolovo	Bulgaria	43.8712	26.1153	2016	MT170396	/	/
Seq372	BG31_13_LCO_21	Culicoides obsoletus	613	Nikolovo	Bulgaria	43.8712	26.1153	2016	MT170397	/	/
Seq373	BG31_14_LCO_22	Culicoides obsoletus	613	Nikolovo	Bulgaria	43.8712	26.1153	2016	MT170398	/	/
Seq374	BG31_16_LCO_24	Culicoides obsoletus	613	Nikolovo	Bulgaria	43.8712	26.1153	2016	MT170399	/	/
Seq375	BG31_17_LCO_25	Culicoides obsoletus	613	Nikolovo	Bulgaria	43.8712	26.1153	2016	MT170400	/	/
Seq376	BG31_18_LCO_26	Culicoides obsoletus	613	Nikolovo	Bulgaria	43.8712	26.1153	2016	MT170401	/	/
Seq377	BG31_20_LCO_28	Culicoides obsoletus	613	Nikolovo	Bulgaria	43.8712	26.1153	2016	MT170402	/	/
Seq378	BG31_21_LCO_29	Culicoides obsoletus	613	Nikolovo	Bulgaria	43.8712	26.1153	2016	MT170403	/	/
Seq379	BG31_22_LCO_30	Culicoides obsoletus	613	Nikolovo	Bulgaria	43.8712	26.1153	2016	MT170404	/	/
Seq380	BG31_23_LCO_31	Culicoides obsoletus	614	Nikolovo	Bulgaria	43.8712	26.1153	2016	MT170405	/	/
Seq381	BG31_24_LCO_32	Culicoides obsoletus	613	Nikolovo	Bulgaria	43.8712	26.1153	2016	MT170406	/	/
Seq382	BG31_27_LCO_35	Culicoides obsoletus	613	Nikolovo	Bulgaria	43.8712	26.1153	2016	MT170407	/	/
Seq383	BG31_28_LCO_36	Culicoides obsoletus	613	Nikolovo	Bulgaria	43.8712	26.1153	2016	MT170408	/	/
Seq384	BG31_29_LCO_37	Culicoides obsoletus	613	Nikolovo	Bulgaria	43.8712	26.1153	2016	MT170409	/	/
Seq385	BG31_30_LCO_38	Culicoides obsoletus	613	Nikolovo	Bulgaria	43.8712	26.1153	2016	MT170410	/	/
Seq386	BG31_31_LCO_39	Culicoides obsoletus	613	Nikolovo	Bulgaria	43.8712	26.1153	2016	MT170411	/	/
Seq387	BG31_32_LCO_40	Culicoides obsoletus	613	Nikolovo	Bulgaria	43.8712	26.1153	2016	MT170412	/	/
Seq388	BG32_01_LCO_41	Culicoides obsoletus	613	Montana	Bulgaria	43.41	23.23	2016	MT170413	/	/
Seq389	BG32_02_LCO_42	Culicoides obsoletus	613	Montana	Bulgaria	43.41	23.23	2016	MT170414	/	/
Seq390	BG32_03_LCO_43	Culicoides obsoletus	613	Montana	Bulgaria	43.41	23.23	2016	MT170415	/	/
Seq391	BG32_04_LCO_44	Culicoides obsoletus	613	Montana	Bulgaria	43.41	23.23	2016	MT170416	/	/
Seq392	BG32_05_LCO_45	Culicoides obsoletus	613	Montana	Bulgaria	43.41	23.23	2016	MT170417	/	/
Seq393	BG32_07_LCO_47	Culicoides obsoletus	613	Montana	Bulgaria	43.41	23.23	2016	MT170418	/	/
Seq394	BG32_08_LCO_48	Culicoides obsoletus	613	Montana	Bulgaria	43.41	23.23	2016	MT170419	/	/
Seq395	BG32_09_LCO_49	Culicoides obsoletus	613	Montana	Bulgaria	43.41	23.23	2016	MT170420	/	/
Seq396	BG32_11_LCO_51	Culicoides obsoletus	603	Montana	Bulgaria	43.41	23.23	2016	MT170421	/	/
Seq397	BG32_12_LCO_52	Culicoides obsoletus	613	Montana	Bulgaria	43.41	23.23	2016	MT170422	/	/
Seq398	BG32_13_LCO_53	Culicoides obsoletus	613	Montana	Bulgaria	43.41	23.23	2016	MT170423	/	/
Seq399	BG32_14_LCO_54	Culicoides obsoletus	613	Montana	Bulgaria	43.41	23.23	2016	MT170424	/	/
Seq400	BG32_15_LCO_55	Culicoides obsoletus	613	Montana	Bulgaria	43.41	23.23	2016	MT170425	/	/
Seq401	BG32_16_LCO_56	Culicoides obsoletus	613	Montana	Bulgaria	43.41	23.23	2016	MT170426	/	/
Seq402	BG32_21_LCO_61	Culicoides obsoletus	613	Montana	Bulgaria	43.41	23.23	2016	MT170427	/	/
Seq403	BG32_22_LCO_62	Culicoides obsoletus	610	Montana	Bulgaria	43.41	23.23	2016	MT170428	/	/
Seq404	BG32_23_LCO_63	Culicoides obsoletus	613	Montana	Bulgaria	43.41	23.23	2016	MT170429	/	/
Seq405	BG32_24_LCO_64	Culicoides obsoletus	603	Montana	Bulgaria	43.41	23.23	2016	MT170430	/	/
Seq406	BG32_26_LCO_66	Culicoides obsoletus	613	Montana	Bulgaria	43.41	23.23	2016	MT170431	/	/
Seq407	BG32_28_LCO_68	Culicoides obsoletus	613	Montana	Bulgaria	43.41	23.23	2016	MT170432	/	/
Seq408	BG32_29_LCO_69	Culicoides obsoletus	613	Montana	Bulgaria	43.41	23.23	2016	MT170433	MT163087	MT175623
Seq409	BG32_30_LCO_70	Culicoides obsoletus	607	Montana	Bulgaria	43.41	23.23	2016	MT170434	/	/
Seq410	BG32_31_LCO_71	Culicoides obsoletus	613	Montana	Bulgaria	43.41	23.23	2016	MT170435	/	/
Seq411	BG32_32_LCO_72	Culicoides obsoletus	613	Montana	Bulgaria	43.41	23.23	2016	MT170436	/	/
Seq412	BG35_01_LCO_6	Culicoides obsoletus	613	Nikolovo	Bulgaria	43.8712	26.1153	2016	MT170437	/	/
Seq413	BG35_02_LCO_7	Culicoides obsoletus	613	Nikolovo	Bulgaria	43.8712	26.1153	2016	MT170438	/	/
Seq414	BG39_01_LCO_73	Culicoides obsoletus	613	Nikolovo	Bulgaria	43.8712	26.1153	2016	MT170439	/	/
Seq415	BG39_02_LCO_74	Culicoides obsoletus	614	Nikolovo	Bulgaria	43.8712	26.1153	2016	MT170440	/	/
Seq416	BG39_05_LCO_77	Culicoides obsoletus	613	Nikolovo	Bulgaria	43.8712	26.1153	2016	MT170441	/	/
Seq417	BG39_07_LCO_79	Culicoides obsoletus	613	Nikolovo	Bulgaria	43.8712	26.1153	2016	MT170442	/	/
Seq418	BG39_08_LCO_80	Culicoides obsoletus	613	Nikolovo	Bulgaria	43.8712	26.1153	2016	MT170443	/	/
Seq419	BG39_09_LCO_81	Culicoides obsoletus	613	Nikolovo	Bulgaria	43.8712	26.1153	2016	MT170444	/	/
Seq420	BG39_13_LCO_85	Culicoides obsoletus	613	Nikolovo	Bulgaria	43.8712	26.1153	2016	MT170445	/	/
Seq421	BG39_14_LCO_86	Culicoides obsoletus	613	Nikolovo	Bulgaria	43.8712	26.1153	2016	MT170446	/	/
Seq422	BG39_15_LCO_87	Culicoides obsoletus	613	Nikolovo	Bulgaria	43.8712	26.1153	2016	MT170447	/	/
Seq423	BG39_16_LCO_88	Culicoides obsoletus	613	Nikolovo	Bulgaria	43.8712	26.1153	2016	MT170448	/	/
Seq424	BG40_01_LCO_89	Culicoides obsoletus	613	Montana	Bulgaria	43.41	23.23	2016	MT170449	/	/
Seq425	BG40_05_LCO_93	Culicoides obsoletus	611	Montana	Bulgaria	43.41	23.23	2016	MT170450	/	/
Seq426	BG40_06_LCO_94	Culicoides obsoletus	613	Montana	Bulgaria	43.41	23.23	2016	MT170451	/	/
Seq427	BG40_07_LCO_95	Culicoides obsoletus	613	Montana	Bulgaria	43.41	23.23	2016	MT170452	/	/
Seq428	BG40_09_LCO_1	Culicoides obsoletus	613	Montana	Bulgaria	43.41	23.23	2016	MT170453	/	/
Seq429	BG40_11_LCO_3	Culicoides obsoletus	614	Montana	Bulgaria	43.41	23.23	2016	MT170454	/	/
Seq430	BG43_01_LCO_4	Culicoides obsoletus	613	Nikolovo	Bulgaria	43.8712	26.1153	2016	MT170455	/	/
Seq431	BG43_03_LCO_6	Culicoides scoticus	613	Nikolovo	Bulgaria	43.8712	26.1153	2016	MT170456	/	/
Seq432	BG43_04_LCO_7	Culicoides obsoletus	613	Nikolovo	Bulgaria	43.8712	26.1153	2016	MT170457	/	/
Seq433	BG43_05_LCO_8	Culicoides obsoletus	613	Nikolovo	Bulgaria	43.8712	26.1153	2016	MT170458	/	/
Seq434	BG43_06_LCO_9	Culicoides obsoletus	612	Nikolovo	Bulgaria	43.8712	26.1153	2016	MT170459	/	/
Seq435	BG44_03_LCO_12	Culicoides obsoletus	613	Montana	Bulgaria	43.41	23.23	2016	MT170460	/	/
Seq436	BG44_04_LCO_13	Culicoides obsoletus	613	Montana	Bulgaria	43.41	23.23	2016	MT170461	/	/
Seq437	BG44_05_LCO_14	Culicoides obsoletus	613	Montana	Bulgaria	43.41	23.23	2016	MT170462	/	/
Seq438	BG44_06_LCO_15	Culicoides obsoletus	613	Montana	Bulgaria	43.41	23.23	2016	MT170463	/	/
Seq439	BG44_07_LCO_16	Culicoides obsoletus	613	Montana	Bulgaria	43.41	23.23	2016	MT170464	/	/
Seq440	BG44_08_LCO_17	Culicoides obsoletus	611	Montana	Bulgaria	43.41	23.23	2016	MT170465	/	/
Seq441	BG44_09_LCO_18	Culicoides obsoletus	613	Montana	Bulgaria	43.41	23.23	2016	MT170466	/	/
Seq442	BG44_10_LCO_19	Culicoides obsoletus	613	Montana	Bulgaria	43.41	23.23	2016	MT170467	/	/
Seq443	BG44_11_LCO_20	Culicoides obsoletus	613	Montana	Bulgaria	43.41	23.23	2016	MT170468	/	/
Seq444	BG44_12_LCO_21	Culicoides obsoletus	613	Montana	Bulgaria	43.41	23.23	2016	MT170469	/	/
Seq445	BG44_13_LCO_22	Culicoides obsoletus	613	Montana	Bulgaria	43.41	23.23	2016	MT170470	/	/
Seq446	BG44_14_LCO_23	Culicoides obsoletus	613	Montana	Bulgaria	43.41	23.23	2016	MT170471	/	/
Seq447	BG44_15_LCO_24	Culicoides obsoletus	613	Montana	Bulgaria	43.41	23.23	2016	MT170472	/	/
Seq448	BG44_16_LCO_25	Culicoides obsoletus	611	Montana	Bulgaria	43.41	23.23	2016	MT170473	/	/
Seq449	BG44_17_LCO_26	Culicoides obsoletus	613	Montana	Bulgaria	43.41	23.23	2016	MT170474	/	/
Seq450	BG47_01_LCO_27	Culicoides obsoletus	613	Nikolovo	Bulgaria	43.8712	26.1153	2016	MT170475	/	/
Seq451	BG47_02_LCO_28	Culicoides obsoletus	613	Nikolovo	Bulgaria	43.8712	26.1153	2016	MT170476	/	/
Seq452	BG47_03_LCO_29	Culicoides obsoletus	613	Nikolovo	Bulgaria	43.8712	26.1153	2016	MT170477	/	/
Seq453	BG48_01_LCO_30	Culicoides obsoletus	614	Montana	Bulgaria	43.41	23.23	2016	MT170478	/	/
Seq454	BG48_02_LCO_31	Culicoides obsoletus	613	Montana	Bulgaria	43.41	23.23	2016	MT170479	/	/
Seq455	BG48_03_LCO_32	Culicoides obsoletus	613	Montana	Bulgaria	43.41	23.23	2016	MT170480	/	/
Seq456	BG48_04_LCO_33	Culicoides obsoletus	613	Montana	Bulgaria	43.41	23.23	2016	MT170481	/	/
Seq457	BG48_05_LCO_34	Culicoides obsoletus	613	Montana	Bulgaria	43.41	23.23	2016	MT170482	/	/
Seq458	BG48_06_LCO_35	Culicoides obsoletus	613	Montana	Bulgaria	43.41	23.23	2016	MT170483	/	/
Seq459	BG48_09_LCO_38	Culicoides obsoletus	613	Montana	Bulgaria	43.41	23.23	2016	MT170484	/	/
Seq460	CH1_01_LCO_1	Culicoides obsoletus	613	Dittingen	Switzerland	47.44	7.5	2009	MT170485	/	/
Seq461	CH1_02_LCO_2	Culicoides scoticus	591	Dittingen	Switzerland	47.44	7.5	2009	MT170486	/	/
Seq462	CH1_03_LCO_3	Culicoides scoticus	602	Dittingen	Switzerland	47.44	7.5	2009	MT170487	/	/
Seq463	CH1_04_LCO_4	Culicoides scoticus	613	Dittingen	Switzerland	47.44	7.5	2009	MT170488	/	/
Seq464	CH1_05_LCO_5	Culicoides scoticus	613	Dittingen	Switzerland	47.44	7.5	2009	MT170489	/	/
Seq465	CH1_07_LCO_7	Culicoides obsoletus	613	Dittingen	Switzerland	47.44	7.5	2009	MT170490	/	/
Seq466	CH1_08_LCO_8	Culicoides obsoletus	613	Dittingen	Switzerland	47.44	7.5	2009	MT170491	/	/
Seq467	CH1_10_LCO_10	Culicoides scoticus	613	Dittingen	Switzerland	47.44	7.5	2009	MT170492	/	/
Seq468	CH1_11_LCO_11	Culicoides scoticus	613	Dittingen	Switzerland	47.44	7.5	2009	MT170493	/	/
Seq469	CH1_12_LCO_12	Culicoides scoticus	613	Dittingen	Switzerland	47.44	7.5	2009	MT170494	/	/
Seq470	CH1_13_LCO_13	Culicoides scoticus	613	Dittingen	Switzerland	47.44	7.5	2009	MT170495	/	/
Seq471	CH1_14_LCO_14	Culicoides scoticus	595	Dittingen	Switzerland	47.44	7.5	2009	MT170496	/	/
Seq472	CH1_15_LCO_15	Culicoides scoticus	613	Dittingen	Switzerland	47.44	7.5	2009	MT170497	/	/
Seq473	CH1_16_LCO_16	Culicoides obsoletus	613	Dittingen	Switzerland	47.44	7.5	2009	MT170498	/	/
Seq474	CH1_17_LCO_17	Culicoides scoticus	613	Dittingen	Switzerland	47.44	7.5	2009	MT170499	/	/
Seq475	CH1_19_LCO_19	Culicoides obsoletus	613	Dittingen	Switzerland	47.44	7.5	2009	MT170500	/	/
Seq476	CH1_20_LCO_20	Culicoides scoticus	613	Dittingen	Switzerland	47.44	7.5	2009	MT170501	/	/
Seq477	CH1_21_LCO_21	Culicoides scoticus	613	Dittingen	Switzerland	47.44	7.5	2009	MT170502	/	/
Seq478	CH1_22_LCO_22	Culicoides obsoletus	613	Dittingen	Switzerland	47.44	7.5	2009	MT170503	/	/
Seq479	CH1_25_LCO_25	Culicoides obsoletus	613	Dittingen	Switzerland	47.44	7.5	2009	MT170504	/	/
Seq480	CH1_26_LCO_26	Culicoides obsoletus	613	Dittingen	Switzerland	47.44	7.5	2009	MT170505	/	/
Seq481	CH1_27_LCO_27	Culicoides obsoletus	611	Dittingen	Switzerland	47.44	7.5	2009	MT170506	/	/
Seq482	CH1_28_LCO_28	Culicoides scoticus	613	Dittingen	Switzerland	47.44	7.5	2009	MT170507	/	/
Seq483	CH1_30_LCO_30	Culicoides obsoletus	613	Dittingen	Switzerland	47.44	7.5	2009	MT170508	/	/
Seq484	CH1_31_LCO_31	Culicoides scoticus	613	Dittingen	Switzerland	47.44	7.5	2009	MT170509	/	/
Seq485	CH1_32_LCO_32	Culicoides scoticus	613	Dittingen	Switzerland	47.44	7.5	2009	MT170510	/	/
Seq486	CH1_33_LCO_33	Culicoides obsoletus	613	Dittingen	Switzerland	47.44	7.5	2009	MT170511	/	/
Seq487	CH1_35_LCO_35	Culicoides scoticus	614	Dittingen	Switzerland	47.44	7.5	2009	MT170512	/	/
Seq488	CH1_36_LCO_36	Culicoides obsoletus	613	Dittingen	Switzerland	47.44	7.5	2009	MT170513	/	/
Seq489	CH1_37_LCO_37	Culicoides scoticus	613	Dittingen	Switzerland	47.44	7.5	2009	MT170514	/	/
Seq490	CH1_38_LCO_38	Culicoides obsoletus	613	Dittingen	Switzerland	47.44	7.5	2009	MT170515	/	/
Seq491	CH1_39_LCO_39	Culicoides scoticus	612	Dittingen	Switzerland	47.44	7.5	2009	MT170516	/	/
Seq492	CH1_40_LCO_40	Culicoides obsoletus	613	Dittingen	Switzerland	47.44	7.5	2009	MT170517	/	/
Seq493	CH1_41_LCO_41	Culicoides scoticus	600	Dittingen	Switzerland	47.44	7.5	2009	MT170518	/	/
Seq494	CH1_42_LCO_42	Culicoides obsoletus	613	Dittingen	Switzerland	47.44	7.5	2009	MT170519	/	/
Seq495	CH1_43_LCO_43	Culicoides obsoletus	613	Dittingen	Switzerland	47.44	7.5	2009	MT170520	/	/
Seq496	CH1_44_LCO_44	Culicoides scoticus	538	Dittingen	Switzerland	47.44	7.5	2009	MT170521	/	/
Seq497	CH1_45_LCO_45	Culicoides obsoletus	613	Dittingen	Switzerland	47.44	7.5	2009	MT170522	/	/
Seq498	CH1_46_LCO_46	Culicoides obsoletus	613	Dittingen	Switzerland	47.44	7.5	2009	MT170523	/	/
Seq499	CH1_47_LCO_47	Culicoides scoticus	610	Dittingen	Switzerland	47.44	7.5	2009	MT170524	/	/
Seq500	CH2_01_LCO_49	Culicoides scoticus	613	Muhleturnen	Switzerland	46.81	7.51	2009	MT170525	/	/
Seq501	CH2_02_LCO_50	Culicoides obsoletus	613	Muhleturnen	Switzerland	46.81	7.51	2009	MT170526	/	/
Seq502	CH2_03_LCO_51	Culicoides scoticus	615	Muhleturnen	Switzerland	46.81	7.51	2009	MT170527	/	/
Seq503	CH2_04_LCO_52	Culicoides obsoletus	613	Muhleturnen	Switzerland	46.81	7.51	2009	MT170528	/	/
Seq504	CH2_05_LCO_53	Culicoides scoticus	611	Muhleturnen	Switzerland	46.81	7.51	2009	MT170529	/	/
Seq505	CH2_06_LCO_54	Culicoides obsoletus	613	Muhleturnen	Switzerland	46.81	7.51	2009	MT170530	/	/
Seq506	CH2_07_LCO_55	Culicoides obsoletus	613	Muhleturnen	Switzerland	46.81	7.51	2009	MT170531	/	/
Seq507	CH2_09_LCO_57	Culicoides obsoletus	582	Muhleturnen	Switzerland	46.81	7.51	2009	MT170532	/	/
Seq508	CH2_10_LCO_58	Culicoides scoticus	613	Muhleturnen	Switzerland	46.81	7.51	2009	MT170533	/	/
Seq509	CH2_11_LCO_59	Culicoides scoticus	534	Muhleturnen	Switzerland	46.81	7.51	2009	MT170534	/	/
Seq510	CH2_13_LCO_61	Culicoides obsoletus	613	Muhleturnen	Switzerland	46.81	7.51	2009	MT170535	/	/
Seq511	CH2_14_LCO_62	Culicoides scoticus	613	Muhleturnen	Switzerland	46.81	7.51	2009	MT170536	/	/
Seq512	CH2_15_LCO_63	Culicoides scoticus	614	Muhleturnen	Switzerland	46.81	7.51	2009	MT170537	/	/
Seq513	CH2_16_LCO_64	Culicoides scoticus	616	Muhleturnen	Switzerland	46.81	7.51	2009	MT170538	/	/
Seq514	CH2_17_LCO_65	Culicoides obsoletus	613	Muhleturnen	Switzerland	46.81	7.51	2009	MT170539	/	/
Seq515	CH2_18_LCO_66	Culicoides scoticus	610	Muhleturnen	Switzerland	46.81	7.51	2009	MT170540	/	/
Seq516	CH2_19_LCO_67	Culicoides obsoletus clade dark	613	Muhleturnen	Switzerland	46.81	7.51	2009	MT170541	/	/
Seq517	CH2_20_LCO_68	Culicoides scoticus	613	Muhleturnen	Switzerland	46.81	7.51	2009	MT170542	/	/
Seq518	CH2_22_LCO_70	Culicoides obsoletus	613	Muhleturnen	Switzerland	46.81	7.51	2009	MT170543	/	/
Seq519	CH2_23_LCO_71	Culicoides scoticus	613	Muhleturnen	Switzerland	46.81	7.51	2009	MT170544	/	/
Seq520	CH2_24_LCO_72	Culicoides scoticus	614	Muhleturnen	Switzerland	46.81	7.51	2009	MT170545	/	/
Seq521	CH2_25_LCO_73	Culicoides scoticus	613	Muhleturnen	Switzerland	46.81	7.51	2009	MT170546	/	/
Seq522	CH2_26_LCO_74	Culicoides obsoletus	613	Muhleturnen	Switzerland	46.81	7.51	2009	MT170547	/	/
Seq523	CH2_27_LCO_75	Culicoides scoticus	566	Muhleturnen	Switzerland	46.81	7.51	2009	MT170548	/	/
Seq524	CH2_28_LCO_76	Culicoides obsoletus	613	Muhleturnen	Switzerland	46.81	7.51	2009	MT170549	/	/
Seq525	CH2_29_LCO_77	Culicoides scoticus	613	Muhleturnen	Switzerland	46.81	7.51	2009	MT170550	/	/
Seq526	CH2_30_LCO_78	Culicoides scoticus	554	Muhleturnen	Switzerland	46.81	7.51	2009	MT170551	/	/
Seq527	CH2_31_LCO_79	Culicoides scoticus	614	Muhleturnen	Switzerland	46.81	7.51	2009	MT170552	/	/
Seq528	CH2_32_LCO_80	Culicoides scoticus	613	Muhleturnen	Switzerland	46.81	7.51	2009	MT170553	/	/
Seq529	CH2_33_LCO_81	Culicoides obsoletus	613	Muhleturnen	Switzerland	46.81	7.51	2009	MT170554	/	/
Seq530	CH2_35_LCO_83	Culicoides scoticus	536	Muhleturnen	Switzerland	46.81	7.51	2009	MT170555	/	/
Seq531	CH2_36_LCO_84	Culicoides scoticus	613	Muhleturnen	Switzerland	46.81	7.51	2009	MT170556	/	/
Seq532	CH2_37_LCO_85	Culicoides scoticus	613	Muhleturnen	Switzerland	46.81	7.51	2009	MT170557	/	/
Seq533	CH2_38_LCO_86	Culicoides obsoletus	613	Muhleturnen	Switzerland	46.81	7.51	2009	MT170558	/	/
Seq534	CH2_39_LCO_87	Culicoides obsoletus	613	Muhleturnen	Switzerland	46.81	7.51	2009	MT170559	/	/
Seq535	CH2_40_LCO_88	Culicoides obsoletus	605	Muhleturnen	Switzerland	46.81	7.51	2009	MT170560	/	/
Seq536	CH2_46_LCO_94	Culicoides obsoletus	613	Muhleturnen	Switzerland	46.81	7.51	2009	MT170561	/	/
Seq537	DE_G11_01_A1_LCO	Culicoides obsoletus	611	Schleiz	Germany	50.57	11.81	2016	MT170562	/	/
Seq538	DE_G11_02_B1_LCO	Culicoides obsoletus	613	Schleiz	Germany	50.57	11.81	2016	MT170563	/	/
Seq539	DE_G11_03_C1_LCO	Culicoides obsoletus	606	Schleiz	Germany	50.57	11.81	2016	MT170564	/	/
Seq540	DE_G11_04_D1_LCO	Culicoides obsoletus	610	Schleiz	Germany	50.57	11.81	2016	MT170565	/	/
Seq541	DE_G11_05_E1_LCO	Culicoides obsoletus	613	Schleiz	Germany	50.57	11.81	2016	MT170566	/	/
Seq542	DE_G11_06_F1_LCO	Culicoides obsoletus	613	Schleiz	Germany	50.57	11.81	2016	MT170567	/	/
Seq543	DE_G11_08_H1_LCO	Culicoides obsoletus	611	Schleiz	Germany	50.57	11.81	2016	MT170568	/	/
Seq544	DE_G11_09_A2_LCO	Culicoides obsoletus	611	Schleiz	Germany	50.57	11.81	2016	MT170569	/	/
Seq545	DE_G11_11_C2_LCO	Culicoides obsoletus	613	Schleiz	Germany	50.57	11.81	2016	MT170570	/	/
Seq546	DE_G11_12_D2_LCO	Culicoides obsoletus	613	Schleiz	Germany	50.57	11.81	2016	MT170571	/	/
Seq547	DE_G11_13_E2_LCO	Culicoides obsoletus	613	Schleiz	Germany	50.57	11.81	2016	MT170572	/	/
Seq548	DE_G11_14_F2_LCO	Culicoides obsoletus	613	Schleiz	Germany	50.57	11.81	2016	MT170573	/	/
Seq549	DE_G11_15_DE_G2_LCO	Culicoides obsoletus	612	Schleiz	Germany	50.57	11.81	2016	MT170574	/	/
Seq550	DE_G11_16_H2_LCO	Culicoides obsoletus	613	Schleiz	Germany	50.57	11.81	2016	MT170575	/	/
Seq551	DE_G11_17_A3_LCO	Culicoides obsoletus	612	Schleiz	Germany	50.57	11.81	2016	MT170576	/	/
Seq552	DE_G11_19_C3_LCO	Culicoides obsoletus	615	Schleiz	Germany	50.57	11.81	2016	MT170577	/	/
Seq553	DE_G11_21_E3_LCO	Culicoides obsoletus	613	Schleiz	Germany	50.57	11.81	2016	MT170578	/	/
Seq554	DE_G11_24_H3_LCO	Culicoides obsoletus	613	Schleiz	Germany	50.57	11.81	2016	MT170579	/	/
Seq555	DE_G11_27_C4_LCO	Culicoides obsoletus	613	Schleiz	Germany	50.57	11.81	2016	MT170580	/	/
Seq556	DE_G11_29_E4_LCO	Culicoides obsoletus	613	Schleiz	Germany	50.57	11.81	2016	MT170581	/	/
Seq557	DE_G11_30_F4_LCO	Culicoides obsoletus	611	Schleiz	Germany	50.57	11.81	2016	MT170582	/	/
Seq558	DE_G11_31_DE_G4_LCO	Culicoides obsoletus	613	Schleiz	Germany	50.57	11.81	2016	MT170583	/	/
Seq559	DE_G11_32_H4_LCO	Culicoides obsoletus	612	Schleiz	Germany	50.57	11.81	2016	MT170584	/	/
Seq560	DE_G11_34_B5_LCO	Culicoides obsoletus	612	Schleiz	Germany	50.57	11.81	2016	MT170585	/	/
Seq561	DE_G11_36_D5_LCO	Culicoides obsoletus	614	Schleiz	Germany	50.57	11.81	2016	MT170586	/	/
Seq562	DE_G11_37_E5_LCO	Culicoides obsoletus	613	Schleiz	Germany	50.57	11.81	2016	MT170587	/	/
Seq563	DE_G11_39_DE_G5_LCO	Culicoides obsoletus	613	Schleiz	Germany	50.57	11.81	2016	MT170588	/	/
Seq564	DE_G11_40_H5_LCO	Culicoides obsoletus	613	Schleiz	Germany	50.57	11.81	2016	MT170589	/	/
Seq565	DE_G11_42_B6_LCO	Culicoides obsoletus	611	Schleiz	Germany	50.57	11.81	2016	MT170590	/	/
Seq566	DE_G11_43_C6_LCO	Culicoides obsoletus	612	Schleiz	Germany	50.57	11.81	2016	MT170591	/	/
Seq567	DE_G11_45_E6_LCO	Culicoides obsoletus	613	Schleiz	Germany	50.57	11.81	2016	MT170592	/	/
Seq568	DE_G11_46_F6_LCO	Culicoides obsoletus	613	Schleiz	Germany	50.57	11.81	2016	MT170593	/	/
Seq569	DE_G11_47_DE_G6_LCO	Culicoides obsoletus	611	Schleiz	Germany	50.57	11.81	2016	MT170594	/	/
Seq571	DE_G3_19_LCO_67	Culicoides obsoletus	613	Peetzig	Germany	53.08	13.94	2016	MT170595	/	/
Seq572	DE_G3_21_LCO_69	Culicoides scoticus	592	Peetzig	Germany	53.08	13.94	2016	MT170596	/	/
Seq573	DE_G3_22_LCO_70	Culicoides scoticus	572	Peetzig	Germany	53.08	13.94	2016	MT170597	/	/
Seq574	DE_G3_26_LCO_74	Culicoides obsoletus	614	Peetzig	Germany	53.08	13.94	2016	MT170598	/	/
Seq575	DE_G3_30_LCO_78	Culicoides obsoletus	613	Peetzig	Germany	53.08	13.94	2016	MT170599	/	/
Seq576	DE_G3_31_LCO_79	Culicoides obsoletus	612	Peetzig	Germany	53.08	13.94	2016	MT170600	/	/
Seq578	DE_G3_34_LCO_82	Culicoides obsoletus	613	Peetzig	Germany	53.08	13.94	2016	MT170601	/	/
Seq579	DE_G3_37_LCO_85	Culicoides obsoletus	613	Peetzig	Germany	53.08	13.94	2016	MT170602	/	/
Seq580	DE_G3_44_LCO_92	Culicoides obsoletus	613	Peetzig	Germany	53.08	13.94	2016	MT170603	/	/
Seq581	DE_G3_47_LCO_95	Culicoides obsoletus	622	Peetzig	Germany	53.08	13.94	2016	MT170604	/	/
Seq582	DE_G9_01_LCO_49	Culicoides scoticus	605	Ziegelbach	Germany	47.89	9.86	2016	MT170605	/	/
Seq583	DE_G9_02_LCO_50	Culicoides obsoletus	611	Ziegelbach	Germany	47.89	9.86	2016	MT170606	/	/
Seq584	DE_G9_03_LCO_51	Culicoides scoticus	612	Ziegelbach	Germany	47.89	9.86	2016	MT170607	/	/
Seq585	DE_G9_04_LCO_52	Culicoides scoticus	613	Ziegelbach	Germany	47.89	9.86	2016	MT170608	MT163088	MT175624
Seq586	DE_G9_05_LCO_53	Culicoides scoticus	601	Ziegelbach	Germany	47.89	9.86	2016	MT170609	/	/
Seq587	DE_G9_07_LCO_55	Culicoides scoticus	613	Ziegelbach	Germany	47.89	9.86	2016	MT170610	/	/
Seq588	DE_G9_08_LCO_56	Culicoides obsoletus	616	Ziegelbach	Germany	47.89	9.86	2016	MT170611	/	/
Seq589	DE_G9_09_LCO_57	Culicoides obsoletus	613	Ziegelbach	Germany	47.89	9.86	2016	MT170612	/	/
Seq590	DE_G9_10_LCO_58	Culicoides obsoletus	613	Ziegelbach	Germany	47.89	9.86	2016	MT170613	/	/
Seq591	DE_G9_11_LCO_59	Culicoides obsoletus	614	Ziegelbach	Germany	47.89	9.86	2016	MT170614	/	/
Seq592	DE_G9_12_LCO_60	Culicoides obsoletus	613	Ziegelbach	Germany	47.89	9.86	2016	MT170615	/	/
Seq593	DE_G9_13_LCO_61	Culicoides obsoletus	613	Ziegelbach	Germany	47.89	9.86	2016	MT170616	/	/
Seq594	DE_G9_14_LCO_62	Culicoides obsoletus	612	Ziegelbach	Germany	47.89	9.86	2016	MT170617	/	/
Seq595	DE_G9_15_LCO_63	Culicoides obsoletus	613	Ziegelbach	Germany	47.89	9.86	2016	MT170618	/	/
Seq596	DE_G9_16_LCO_64	Culicoides obsoletus	613	Ziegelbach	Germany	47.89	9.86	2016	MT170619	/	/
Seq597	DE_G9_17_LCO_65	Culicoides obsoletus	613	Ziegelbach	Germany	47.89	9.86	2016	MT170620	/	/
Seq598	DE_G9_18_LCO_66	Culicoides scoticus	620	Ziegelbach	Germany	47.89	9.86	2016	MT170621	/	/
Seq599	DE_G9_19_LCO_67	Culicoides obsoletus	613	Ziegelbach	Germany	47.89	9.86	2016	MT170622	/	/
Seq600	DE_G9_20_LCO_68	Culicoides scoticus	613	Ziegelbach	Germany	47.89	9.86	2016	MT170623	/	/
Seq601	DE_G9_22_LCO_70	Culicoides obsoletus	613	Ziegelbach	Germany	47.89	9.86	2016	MT170624	/	/
Seq602	DE_G9_23_LCO_71	Culicoides obsoletus	613	Ziegelbach	Germany	47.89	9.86	2016	MT170625	/	/
Seq603	DE_G9_24_LCO_72	Culicoides obsoletus	613	Ziegelbach	Germany	47.89	9.86	2016	MT170626	/	/
Seq604	DE_G9_25_LCO_73	Culicoides obsoletus	613	Ziegelbach	Germany	47.89	9.86	2016	MT170627	/	/
Seq605	DE_G9_26_LCO_74	Culicoides obsoletus	614	Ziegelbach	Germany	47.89	9.86	2016	MT170628	/	/
Seq606	DE_G9_27_LCO_75	Culicoides obsoletus	613	Ziegelbach	Germany	47.89	9.86	2016	MT170629	/	/
Seq607	DE_G9_28_LCO_76	Culicoides obsoletus	612	Ziegelbach	Germany	47.89	9.86	2016	MT170630	/	/
Seq608	DE_G9_29_LCO_77	Culicoides scoticus	612	Ziegelbach	Germany	47.89	9.86	2016	MT170631	/	/
Seq609	DE_G9_30_LCO_78	Culicoides obsoletus	613	Ziegelbach	Germany	47.89	9.86	2016	MT170632	/	/
Seq610	DE_G9_31_LCO_79	Culicoides scoticus	613	Ziegelbach	Germany	47.89	9.86	2016	MT170633	/	/
Seq611	DE_G9_33_LCO_81	Culicoides obsoletus	613	Ziegelbach	Germany	47.89	9.86	2016	MT170634	/	/
Seq612	DE_G9_34_LCO_82	Culicoides obsoletus	614	Ziegelbach	Germany	47.89	9.86	2016	MT170635	/	/
Seq613	DE_G9_35_LCO_83	Culicoides obsoletus	612	Ziegelbach	Germany	47.89	9.86	2016	MT170636	/	/
Seq614	DE_G9_36_LCO_84	Culicoides scoticus	610	Ziegelbach	Germany	47.89	9.86	2016	MT170637	/	/
Seq615	DE_G9_37_LCO_85	Culicoides obsoletus	612	Ziegelbach	Germany	47.89	9.86	2016	MT170638	/	/
Seq616	DE_G9_38_LCO_86	Culicoides obsoletus	611	Ziegelbach	Germany	47.89	9.86	2016	MT170639	/	/
Seq617	DE_G9_39_LCO_87	Culicoides scoticus	622	Ziegelbach	Germany	47.89	9.86	2016	MT170640	/	/
Seq618	DE_G9_40_LCO_88	Culicoides obsoletus	613	Ziegelbach	Germany	47.89	9.86	2016	MT170641	/	/
Seq619	DE_G9_42_LCO_90	Culicoides obsoletus	613	Ziegelbach	Germany	47.89	9.86	2016	MT170642	/	/
Seq620	DE_G9_43_LCO_91	Culicoides obsoletus	616	Ziegelbach	Germany	47.89	9.86	2016	MT170643	/	/
Seq621	DE_G9_44_LCO_92	Culicoides obsoletus	613	Ziegelbach	Germany	47.89	9.86	2016	MT170644	/	/
Seq622	DE_G9_45_LCO_93	Culicoides obsoletus	614	Ziegelbach	Germany	47.89	9.86	2016	MT170645	/	/
Seq623	DE_G9_46_LCO_94	Culicoides obsoletus	614	Ziegelbach	Germany	47.89	9.86	2016	MT170646	/	/
Seq624	DK_BR1_01_LCO_1	Culicoides obsoletus clade O2	613	Lægdsgårdsvej	Denmark	56.12	9.12	2015	MT170647	/	/
Seq625	DK_BR1_02_LCO_2	Culicoides obsoletus	614	Lægdsgårdsvej	Denmark	56.12	9.12	2015	MT170648	/	/
Seq626	DK_BR1_03_LCO_3	Culicoides obsoletus clade O2	613	Lægdsgårdsvej	Denmark	56.12	9.12	2015	MT170649	/	/
Seq627	DK_BR1_04_LCO_4	Culicoides obsoletus clade O2	613	Lægdsgårdsvej	Denmark	56.12	9.12	2015	MT170650	/	/
Seq628	DK_BR1_05_LCO_5	Culicoides obsoletus clade O2	613	Lægdsgårdsvej	Denmark	56.12	9.12	2015	MT170651	/	/
Seq629	DK_BR1_06_LCO_6	Culicoides obsoletus	613	Lægdsgårdsvej	Denmark	56.12	9.12	2015	MT170652	/	/
Seq630	DK_BR1_07_LCO_7	Culicoides scoticus	613	Lægdsgårdsvej	Denmark	56.12	9.12	2015	MT170653	/	/
Seq631	DK_BR1_08_LCO_8	Culicoides obsoletus clade O2	614	Lægdsgårdsvej	Denmark	56.12	9.12	2015	MT170654	/	/
Seq632	DK_BR1_09_LCO_9	Culicoides scoticus	613	Lægdsgårdsvej	Denmark	56.12	9.12	2015	MT170655	/	/
Seq633	DK_BR1_10_LCO_10	Culicoides obsoletus clade O2	613	Lægdsgårdsvej	Denmark	56.12	9.12	2015	MT170656	/	/
Seq634	DK_BR1_11_LCO_11	Culicoides obsoletus	613	Lægdsgårdsvej	Denmark	56.12	9.12	2015	MT170657	/	/
Seq635	DK_BR1_12_LCO_12	Culicoides obsoletus clade O2	615	Lægdsgårdsvej	Denmark	56.12	9.12	2015	MT170658	/	/
Seq636	DK_BR1_13_LCO_13	Culicoides obsoletus clade O2	613	Lægdsgårdsvej	Denmark	56.12	9.12	2015	MT170659	/	/
Seq637	DK_BR1_14_LCO_14	Culicoides obsoletus clade O2	614	Lægdsgårdsvej	Denmark	56.12	9.12	2015	MT170660	/	/
Seq638	DK_BR1_15_LCO_15	Culicoides obsoletus clade O2	616	Lægdsgårdsvej	Denmark	56.12	9.12	2015	MT170661	/	/
Seq639	DK_BR1_16_LCO_16	Culicoides obsoletus clade O2	618	Lægdsgårdsvej	Denmark	56.12	9.12	2015	MT170662	/	/
Seq640	DK_BR1_17_LCO_17	Culicoides obsoletus clade O2	613	Lægdsgårdsvej	Denmark	56.12	9.12	2015	MT170663	/	/
Seq641	DK_BR1_18_LCO_18	Culicoides obsoletus clade O2	614	Lægdsgårdsvej	Denmark	56.12	9.12	2015	MT170664	/	/
Seq642	DK_BR1_19_LCO_19	Culicoides obsoletus clade O2	616	Lægdsgårdsvej	Denmark	56.12	9.12	2015	MT170665	/	/
Seq643	DK_BR1_20_LCO_20	Culicoides obsoletus clade O2	613	Lægdsgårdsvej	Denmark	56.12	9.12	2015	MT170666	/	/
Seq644	DK_BR1_21_LCO_21	Culicoides obsoletus clade O2	613	Lægdsgårdsvej	Denmark	56.12	9.12	2015	MT170667	/	/
Seq645	DK_BR1_22_LCO_22	Culicoides obsoletus clade O2	612	Lægdsgårdsvej	Denmark	56.12	9.12	2015	MT170668	/	/
Seq646	DK_BR1_24_LCO_24	Culicoides obsoletus clade O2	613	Lægdsgårdsvej	Denmark	56.12	9.12	2015	MT170669	/	/
Seq647	DK_BR1_25_LCO_25	Culicoides obsoletus clade O2	613	Lægdsgårdsvej	Denmark	56.12	9.12	2015	MT170670	/	/
Seq648	DK_BR1_26_LCO_26	Culicoides obsoletus clade O2	613	Lægdsgårdsvej	Denmark	56.12	9.12	2015	MT170671	/	/
Seq649	DK_BR1_27_LCO_27	Culicoides obsoletus clade O2	613	Lægdsgårdsvej	Denmark	56.12	9.12	2015	MT170672	/	/
Seq650	DK_BR1_28_LCO_28	Culicoides obsoletus clade O2	613	Lægdsgårdsvej	Denmark	56.12	9.12	2015	MT170673	/	/
Seq651	DK_BR1_31_LCO_31	Culicoides obsoletus clade O2	613	Lægdsgårdsvej	Denmark	56.12	9.12	2015	MT170674	/	/
Seq652	DK_BR7_02_LCO_34	Culicoides obsoletus clade O2	613	Lægdsgårdsvej	Denmark	56.12	9.12	2015	MT170675	MT163089	MT175625
Seq653	DK_BR7_04_LCO_36	Culicoides obsoletus clade O2	613	Lægdsgårdsvej	Denmark	56.12	9.12	2015	MT170676	/	/
Seq654	DK_BR7_05_LCO_37	Culicoides obsoletus clade O2	613	Lægdsgårdsvej	Denmark	56.12	9.12	2015	MT170677	/	/
Seq655	DK_BR7_06_LCO_38	Culicoides obsoletus clade O2	613	Lægdsgårdsvej	Denmark	56.12	9.12	2015	MT170678	/	/
Seq656	DK_BR7_07_LCO_39	Culicoides obsoletus clade O2	613	Lægdsgårdsvej	Denmark	56.12	9.12	2015	MT170679	/	/
Seq657	DK_BR7_09_LCO_41	Culicoides obsoletus	613	Lægdsgårdsvej	Denmark	56.12	9.12	2015	MT170680	/	/
Seq658	DK_BR7_11_LCO_43	Culicoides obsoletus clade O2	614	Lægdsgårdsvej	Denmark	56.12	9.12	2015	MT170681	/	/
Seq659	DK_BR7_12_LCO_44	Culicoides obsoletus clade O2	613	Lægdsgårdsvej	Denmark	56.12	9.12	2015	MT170682	/	/
Seq660	DK_BR7_14_LCO_46	Culicoides obsoletus	613	Lægdsgårdsvej	Denmark	56.12	9.12	2015	MT170683	/	/
Seq661	DK_BR7_15_LCO_47	Culicoides scoticus	613	Lægdsgårdsvej	Denmark	56.12	9.12	2015	MT170684	/	/
Seq662	DK_BR7_16_LCO_48	Culicoides scoticus	613	Lægdsgårdsvej	Denmark	56.12	9.12	2015	MT170685	/	/
Seq663	DK_BR7_28_LCO_60	Culicoides obsoletus	613	Lægdsgårdsvej	Denmark	56.12	9.12	2015	MT170686	/	/
Seq664	DK_BR7_29_LCO_61	Culicoides obsoletus	613	Lægdsgårdsvej	Denmark	56.12	9.12	2015	MT170687	/	/
Seq665	DK_BR9_01_LCO_65	Culicoides obsoletus	613	Lægdsgårdsvej	Denmark	56.12	9.12	2015	MT170688	/	/
Seq666	DK_BR9_05_LCO_69	Culicoides scoticus	613	Lægdsgårdsvej	Denmark	56.12	9.12	2015	MT170689	/	/
Seq667	DK_BR9_07_LCO_71	Culicoides scoticus	613	Lægdsgårdsvej	Denmark	56.12	9.12	2015	MT170690	/	/
Seq668	DK_BR9_08_LCO_72	Culicoides obsoletus	613	Lægdsgårdsvej	Denmark	56.12	9.12	2015	MT170691	/	/
Seq669	DK_BR9_10_LCO_74	Culicoides obsoletus	613	Lægdsgårdsvej	Denmark	56.12	9.12	2015	MT170692	/	/
Seq670	DK_BR9_12_LCO_76	Culicoides obsoletus	613	Lægdsgårdsvej	Denmark	56.12	9.12	2015	MT170693	/	/
Seq671	DK_BR9_13_LCO_77	Culicoides obsoletus	613	Lægdsgårdsvej	Denmark	56.12	9.12	2015	MT170694	/	/
Seq672	DK_BR9_14_LCO_78	Culicoides obsoletus	613	Lægdsgårdsvej	Denmark	56.12	9.12	2015	MT170695	/	/
Seq673	DK_BR9_15_LCO_79	Culicoides obsoletus	613	Lægdsgårdsvej	Denmark	56.12	9.12	2015	MT170696	/	/
Seq674	DK_BR9_16_LCO_80	Culicoides obsoletus	613	Lægdsgårdsvej	Denmark	56.12	9.12	2015	MT170697	/	/
Seq675	DK_BR9_17_LCO_81	Culicoides obsoletus	613	Lægdsgårdsvej	Denmark	56.12	9.12	2015	MT170698	/	/
Seq676	DK_BR9_18_LCO_82	Culicoides obsoletus	613	Lægdsgårdsvej	Denmark	56.12	9.12	2015	MT170699	/	/
Seq677	DK_BR9_19_LCO_83	Culicoides obsoletus	613	Lægdsgårdsvej	Denmark	56.12	9.12	2015	MT170700	/	/
Seq678	DK_BR9_20_LCO_84	Culicoides obsoletus	613	Lægdsgårdsvej	Denmark	56.12	9.12	2015	MT170701	/	/
Seq679	DK_BR9_21_LCO_85	Culicoides obsoletus	613	Lægdsgårdsvej	Denmark	56.12	9.12	2015	MT170702	/	/
Seq680	DK_BR9_22_LCO_86	Culicoides obsoletus	613	Lægdsgårdsvej	Denmark	56.12	9.12	2015	MT170703	/	/
Seq681	DK_BR9_25_LCO_89	Culicoides obsoletus	613	Lægdsgårdsvej	Denmark	56.12	9.12	2015	MT170704	/	/
Seq682	DK_BR9_27_LCO_91	Culicoides obsoletus	611	Lægdsgårdsvej	Denmark	56.12	9.12	2015	MT170705	/	/
Seq683	DK_BR9_28_LCO_92	Culicoides obsoletus	613	Lægdsgårdsvej	Denmark	56.12	9.12	2015	MT170706	/	/
Seq684	DK_BR9_29_LCO_93	Culicoides scoticus	613	Lægdsgårdsvej	Denmark	56.12	9.12	2015	MT170707	/	/
Seq685	DK_BR9_30_LCO_94	Culicoides obsoletus	613	Lægdsgårdsvej	Denmark	56.12	9.12	2015	MT170708	/	/
Seq686	DK11_01_LCO_65	Culicoides obsoletus	616	Leestrupvej	Denmark	55.22	12.05	2015	MT170709	/	/
Seq687	DK11_02_LCO_66	Culicoides obsoletus	613	Leestrupvej	Denmark	55.22	12.05	2015	MT170710	/	/
Seq688	DK11_03_LCO_67	Culicoides obsoletus	604	Leestrupvej	Denmark	55.22	12.05	2015	MT170711	/	/
Seq689	DK11_06_LCO_70	Culicoides obsoletus	613	Leestrupvej	Denmark	55.22	12.05	2015	MT170712	/	/
Seq690	DK11_08_LCO_72	Culicoides obsoletus	614	Leestrupvej	Denmark	55.22	12.05	2015	MT170713	/	/
Seq691	DK11_09_LCO_73	Culicoides obsoletus	611	Leestrupvej	Denmark	55.22	12.05	2015	MT170714	/	/
Seq692	DK11_10_LCO_74	Culicoides scoticus	611	Leestrupvej	Denmark	55.22	12.05	2015	MT170715	/	/
Seq693	DK11_11_LCO_75	Culicoides obsoletus	598	Leestrupvej	Denmark	55.22	12.05	2015	MT170716	/	/
Seq694	DK11_13_LCO_77	Culicoides obsoletus	611	Leestrupvej	Denmark	55.22	12.05	2015	MT170717	/	/
Seq695	DK11_15_LCO_79	Culicoides obsoletus	613	Leestrupvej	Denmark	55.22	12.05	2015	MT170718	/	/
Seq696	DK11_16_LCO_80	Culicoides obsoletus	611	Leestrupvej	Denmark	55.22	12.05	2015	MT170719	/	/
Seq697	DK11_17_LCO_81	Culicoides obsoletus	611	Leestrupvej	Denmark	55.22	12.05	2015	MT170720	/	/
Seq698	DK11_18_LCO_82	Culicoides obsoletus	613	Leestrupvej	Denmark	55.22	12.05	2015	MT170721	/	/
Seq699	DK11_19_LCO_83	Culicoides obsoletus	611	Leestrupvej	Denmark	55.22	12.05	2015	MT170722	/	/
Seq700	DK11_20_LCO_84	Culicoides scoticus	613	Leestrupvej	Denmark	55.22	12.05	2015	MT170723	/	/
Seq701	DK11_21_LCO_85	Culicoides scoticus	611	Leestrupvej	Denmark	55.22	12.05	2015	MT170724	/	/
Seq702	DK11_22_LCO_86	Culicoides obsoletus	614	Leestrupvej	Denmark	55.22	12.05	2015	MT170725	/	/
Seq703	DK11_23_LCO_87	Culicoides obsoletus	611	Leestrupvej	Denmark	55.22	12.05	2015	MT170726	/	/
Seq704	DK11_25_LCO_89	Culicoides obsoletus	613	Leestrupvej	Denmark	55.22	12.05	2015	MT170727	/	/
Seq705	DK11_26_LCO_90	Culicoides obsoletus	611	Leestrupvej	Denmark	55.22	12.05	2015	MT170728	/	/
Seq706	DK11_27_LCO_91	Culicoides obsoletus	613	Leestrupvej	Denmark	55.22	12.05	2015	MT170729	MT163090	MT175626
Seq707	DK11_28_LCO_92	Culicoides obsoletus	604	Leestrupvej	Denmark	55.22	12.05	2015	MT170730	/	/
Seq708	DK11_30_LCO_94	Culicoides obsoletus	614	Leestrupvej	Denmark	55.22	12.05	2015	MT170731	/	/
Seq709	DK12_01_LCO_61	Culicoides obsoletus	611	Dyssevej	Denmark	55.2	12.11	2015	MT170732	/	/
Seq710	DK12_02_LCO_62	Culicoides obsoletus	613	Dyssevej	Denmark	55.2	12.11	2015	MT170733	/	/
Seq711	DK12_03_LCO_63	Culicoides obsoletus	614	Dyssevej	Denmark	55.2	12.11	2015	MT170734	/	/
Seq712	DK12_04_LCO_64	Culicoides obsoletus	614	Dyssevej	Denmark	55.2	12.11	2015	MT170735	/	/
Seq713	DK12_05_LCO_65	Culicoides obsoletus	613	Dyssevej	Denmark	55.2	12.11	2015	MT170736	/	/
Seq714	DK12_06_LCO_66	Culicoides obsoletus	613	Dyssevej	Denmark	55.2	12.11	2015	MT170737	/	/
Seq715	DK12_07_LCO_67	Culicoides obsoletus	613	Dyssevej	Denmark	55.2	12.11	2015	MT170738	/	/
Seq716	DK12_08_LCO_68	Culicoides obsoletus	613	Dyssevej	Denmark	55.2	12.11	2015	MT170739	/	/
Seq717	DK12_09_LCO_69	Culicoides obsoletus clade dark	613	Dyssevej	Denmark	55.2	12.11	2015	MT170740	/	/
Seq718	DK12_10_LCO_70	Culicoides obsoletus	614	Dyssevej	Denmark	55.2	12.11	2015	MT170741	/	/
Seq719	DK12_12_LCO_72	Culicoides obsoletus	613	Dyssevej	Denmark	55.2	12.11	2015	MT170742	/	/
Seq720	DK12_13_LCO_73	Culicoides obsoletus	613	Dyssevej	Denmark	55.2	12.11	2015	MT170743	/	/
Seq721	DK12_14_LCO_74	Culicoides obsoletus	614	Dyssevej	Denmark	55.2	12.11	2015	MT170744	MT163091	MT175627
Seq722	DK12_15_LCO_75	Culicoides obsoletus	613	Dyssevej	Denmark	55.2	12.11	2015	MT170745	/	/
Seq723	DK12_16_LCO_76	Culicoides obsoletus	614	Dyssevej	Denmark	55.2	12.11	2015	MT170746	/	/
Seq724	DK12_17_LCO_77	Culicoides obsoletus	614	Dyssevej	Denmark	55.2	12.11	2015	MT170747	/	/
Seq725	DK12_18_LCO_78	Culicoides obsoletus	614	Dyssevej	Denmark	55.2	12.11	2015	MT170748	/	/
Seq726	DK12_19_LCO_79	Culicoides obsoletus	613	Dyssevej	Denmark	55.2	12.11	2015	MT170749	/	/
Seq727	DK12_20_LCO_80	Culicoides obsoletus	613	Dyssevej	Denmark	55.2	12.11	2015	MT170750	/	/
Seq728	DK12_21_LCO_81	Culicoides obsoletus	612	Dyssevej	Denmark	55.2	12.11	2015	MT170751	/	/
Seq729	DK12_22_LCO_82	Culicoides obsoletus	613	Dyssevej	Denmark	55.2	12.11	2015	MT170752	/	/
Seq730	DK12_24_LCO_84	Culicoides obsoletus	614	Dyssevej	Denmark	55.2	12.11	2015	MT170753	/	/
Seq731	DK12_25_LCO_85	Culicoides obsoletus	614	Dyssevej	Denmark	55.2	12.11	2015	MT170754	/	/
Seq732	DK12_26_LCO_86	Culicoides obsoletus	613	Dyssevej	Denmark	55.2	12.11	2015	MT170755	/	/
Seq733	DK12_27_LCO_87	Culicoides obsoletus	613	Dyssevej	Denmark	55.2	12.11	2015	MT170756	/	/
Seq734	DK12_28_LCO_88	Culicoides obsoletus	613	Dyssevej	Denmark	55.2	12.11	2015	MT170757	/	/
Seq735	DK12_29_LCO_89	Culicoides obsoletus	613	Dyssevej	Denmark	55.2	12.11	2015	MT170758	/	/
Seq736	DK12_30_LCO_90	Culicoides obsoletus	613	Dyssevej	Denmark	55.2	12.11	2015	MT170759	/	/
Seq737	DK13_02_LCO_2	Culicoides obsoletus	613	Lægdsgårdsvej	Denmark	56.12	9.12	2015	MT170760	MT163092	MT175628
Seq738	DK13_03_LCO_3	Culicoides scoticus	613	Lægdsgårdsvej	Denmark	56.12	9.12	2015	MT170761	/	/
Seq739	DK13_04_LCO_4	Culicoides scoticus	613	Lægdsgårdsvej	Denmark	56.12	9.12	2015	MT170762	/	/
Seq740	DK13_05_LCO_5	Culicoides obsoletus	613	Lægdsgårdsvej	Denmark	56.12	9.12	2015	MT170763	/	/
Seq741	DK13_06_LCO_6	Culicoides obsoletus	613	Lægdsgårdsvej	Denmark	56.12	9.12	2015	MT170764	/	/
Seq742	DK13_07_LCO_7	Culicoides obsoletus	613	Lægdsgårdsvej	Denmark	56.12	9.12	2015	MT170765	/	/
Seq743	DK13_08_LCO_8	Culicoides obsoletus	613	Lægdsgårdsvej	Denmark	56.12	9.12	2015	MT170766	/	/
Seq744	DK13_09_LCO_9	Culicoides obsoletus	613	Lægdsgårdsvej	Denmark	56.12	9.12	2015	MT170767	/	/
Seq745	DK13_10_LCO_10	Culicoides scoticus	613	Lægdsgårdsvej	Denmark	56.12	9.12	2015	MT170768	/	/
Seq746	DK13_11_LCO_11	Culicoides obsoletus	615	Lægdsgårdsvej	Denmark	56.12	9.12	2015	MT170769	/	/
Seq747	DK13_13_LCO_13	Culicoides obsoletus	611	Lægdsgårdsvej	Denmark	56.12	9.12	2015	MT170770	/	/
Seq748	DK13_14_LCO_14	Culicoides obsoletus	608	Lægdsgårdsvej	Denmark	56.12	9.12	2015	MT170771	/	/
Seq749	DK13_15_LCO_15	Culicoides obsoletus	613	Lægdsgårdsvej	Denmark	56.12	9.12	2015	MT170772	/	/
Seq750	DK13_16_LCO_16	Culicoides obsoletus	613	Lægdsgårdsvej	Denmark	56.12	9.12	2015	MT170773	/	/
Seq751	DK13_17_LCO_17	Culicoides obsoletus	613	Lægdsgårdsvej	Denmark	56.12	9.12	2015	MT170774	/	/
Seq752	DK13_18_LCO_18	Culicoides obsoletus	613	Lægdsgårdsvej	Denmark	56.12	9.12	2015	MT170775	/	/
Seq753	DK13_19_LCO_19	Culicoides obsoletus	613	Lægdsgårdsvej	Denmark	56.12	9.12	2015	MT170776	/	/
Seq754	DK13_20_LCO_20	Culicoides obsoletus	613	Lægdsgårdsvej	Denmark	56.12	9.12	2015	MT170777	/	/
Seq755	DK13_23_LCO_23	Culicoides scoticus	614	Lægdsgårdsvej	Denmark	56.12	9.12	2015	MT170778	/	/
Seq756	DK13_24_LCO_24	Culicoides obsoletus	613	Lægdsgårdsvej	Denmark	56.12	9.12	2015	MT170779	/	/
Seq757	DK13_25_LCO_25	Culicoides obsoletus	613	Lægdsgårdsvej	Denmark	56.12	9.12	2015	MT170780	/	/
Seq758	DK13_27_LCO_27	Culicoides obsoletus	613	Lægdsgårdsvej	Denmark	56.12	9.12	2015	MT170781	/	/
Seq759	DK13_30_LCO_30	Culicoides obsoletus	613	Lægdsgårdsvej	Denmark	56.12	9.12	2015	MT170782	/	/
Seq760	DK13_31_LCO_31	Culicoides obsoletus	613	Lægdsgårdsvej	Denmark	56.12	9.12	2015	MT170783	/	/
Seq761	DK13_32_LCO_32	Culicoides obsoletus	601	Lægdsgårdsvej	Denmark	56.12	9.12	2015	MT170784	/	/
Seq762	DK14_03_LCO_35	Culicoides obsoletus	614	Grøddevej	Denmark	56.13	9.18	2015	MT170785	/	/
Seq763	DK14_04_LCO_36	Culicoides obsoletus	610	Grøddevej	Denmark	56.13	9.18	2015	MT170786	/	/
Seq764	DK14_08_LCO_40	Culicoides scoticus	611	Grøddevej	Denmark	56.13	9.18	2015	MT170787	/	/
Seq765	DK14_09_LCO_41	Culicoides obsoletus	611	Grøddevej	Denmark	56.13	9.18	2015	MT170788	/	/
Seq766	DK14_12_LCO_44	Culicoides obsoletus	611	Grøddevej	Denmark	56.13	9.18	2015	MT170789	/	/
Seq767	DK14_16_LCO_48	Culicoides obsoletus	613	Grøddevej	Denmark	56.13	9.18	2015	MT170790	/	/
Seq768	DK14_21_LCO_53	Culicoides obsoletus	613	Grøddevej	Denmark	56.13	9.18	2015	MT170791	/	/
Seq769	DK14_22_LCO_54	Culicoides scoticus	610	Grøddevej	Denmark	56.13	9.18	2015	MT170792	/	/
Seq770	DK14_23_LCO_55	Culicoides obsoletus	611	Grøddevej	Denmark	56.13	9.18	2015	MT170793	/	/
Seq771	DK14_24_LCO_56	Culicoides obsoletus	611	Grøddevej	Denmark	56.13	9.18	2015	MT170794	/	/
Seq772	DK14_27_LCO_59	Culicoides scoticus	611	Grøddevej	Denmark	56.13	9.18	2015	MT170795	/	/
Seq773	DK15_01_LCO_1	Culicoides obsoletus	612	Dyssevej	Denmark	55.2	12.11	2015	MT170796	/	/
Seq774	DK15_02_LCO_2	Culicoides obsoletus	613	Dyssevej	Denmark	55.2	12.11	2015	MT170797	/	/
Seq775	DK15_03_LCO_3	Culicoides scoticus	616	Dyssevej	Denmark	55.2	12.11	2015	MT170798	/	/
Seq776	DK15_04_LCO_4	Culicoides obsoletus	612	Dyssevej	Denmark	55.2	12.11	2015	MT170799	/	/
Seq777	DK15_05_LCO_5	Culicoides obsoletus	611	Dyssevej	Denmark	55.2	12.11	2015	MT170800	/	/
Seq778	DK15_06_LCO_6	Culicoides obsoletus	613	Dyssevej	Denmark	55.2	12.11	2015	MT170801	/	/
Seq779	DK15_09_LCO_9	Culicoides obsoletus	611	Dyssevej	Denmark	55.2	12.11	2015	MT170802	/	/
Seq780	DK15_10_LCO_10	Culicoides obsoletus	613	Dyssevej	Denmark	55.2	12.11	2015	MT170803	/	/
Seq781	DK15_11_LCO_11	Culicoides obsoletus	611	Dyssevej	Denmark	55.2	12.11	2015	MT170804	/	/
Seq782	DK15_12_LCO_12	Culicoides scoticus	614	Dyssevej	Denmark	55.2	12.11	2015	MT170805	/	/
Seq783	DK15_13_LCO_13	Culicoides obsoletus	613	Dyssevej	Denmark	55.2	12.11	2015	MT170806	/	/
Seq784	DK15_14_LCO_14	Culicoides obsoletus	613	Dyssevej	Denmark	55.2	12.11	2015	MT170807	/	/
Seq785	DK15_15_LCO_15	Culicoides obsoletus	611	Dyssevej	Denmark	55.2	12.11	2015	MT170808	/	/
Seq786	DK15_16_LCO_16	Culicoides obsoletus	613	Dyssevej	Denmark	55.2	12.11	2015	MT170809	/	/
Seq787	DK15_17_LCO_17	Culicoides obsoletus	613	Dyssevej	Denmark	55.2	12.11	2015	MT170810	/	/
Seq788	DK15_19_LCO_19	Culicoides scoticus	613	Dyssevej	Denmark	55.2	12.11	2015	MT170811	/	/
Seq789	DK15_20_LCO_20	Culicoides obsoletus	613	Dyssevej	Denmark	55.2	12.11	2015	MT170812	/	/
Seq790	DK15_21_LCO_21	Culicoides obsoletus	613	Dyssevej	Denmark	55.2	12.11	2015	MT170813	/	/
Seq791	DK15_22_LCO_22	Culicoides obsoletus	613	Dyssevej	Denmark	55.2	12.11	2015	MT170814	/	/
Seq792	DK15_23_LCO_23	Culicoides obsoletus	613	Dyssevej	Denmark	55.2	12.11	2015	MT170815	/	/
Seq793	DK15_24_LCO_24	Culicoides scoticus	613	Dyssevej	Denmark	55.2	12.11	2015	MT170816	/	/
Seq794	DK15_25_LCO_25	Culicoides obsoletus	614	Dyssevej	Denmark	55.2	12.11	2015	MT170817	/	/
Seq795	DK15_26_LCO_26	Culicoides obsoletus	613	Dyssevej	Denmark	55.2	12.11	2015	MT170818	/	/
Seq796	DK15_28_LCO_28	Culicoides scoticus	614	Dyssevej	Denmark	55.2	12.11	2015	MT170819	/	/
Seq797	DK15_29_LCO_29	Culicoides obsoletus	613	Dyssevej	Denmark	55.2	12.11	2015	MT170820	MT163093	MT175629
Seq798	DK15_30_LCO_30	Culicoides scoticus	613	Dyssevej	Denmark	55.2	12.11	2015	MT170821	/	/
Seq799	DK15_31_LCO_31	Culicoides obsoletus	613	Dyssevej	Denmark	55.2	12.11	2015	MT170822	/	/
Seq800	DK16_06_LCO_6	Culicoides scoticus	613	Leestrupvej	Denmark	55.22	12.05	2015	MT170823	/	/
Seq801	DK16_07_LCO_7	Culicoides scoticus	613	Leestrupvej	Denmark	55.22	12.05	2015	MT170824	/	/
Seq802	DK16_08_LCO_8	Culicoides scoticus	613	Leestrupvej	Denmark	55.22	12.05	2015	MT170825	/	/
Seq803	DK16_09_LCO_9	Culicoides obsoletus	613	Leestrupvej	Denmark	55.22	12.05	2015	MT170826	/	/
Seq804	DK16_11_LCO_11	Culicoides scoticus	613	Leestrupvej	Denmark	55.22	12.05	2015	MT170827	/	/
Seq805	DK16_12_LCO_12	Culicoides obsoletus	613	Leestrupvej	Denmark	55.22	12.05	2015	MT170828	/	/
Seq806	DK16_13_LCO_13	Culicoides scoticus	614	Leestrupvej	Denmark	55.22	12.05	2015	MT170829	/	/
Seq807	DK16_14_LCO_14	Culicoides scoticus	613	Leestrupvej	Denmark	55.22	12.05	2015	MT170830	/	/
Seq808	DK16_15_LCO_15	Culicoides scoticus	613	Leestrupvej	Denmark	55.22	12.05	2015	MT170831	/	/
Seq809	DK16_16_LCO_16	Culicoides scoticus	613	Leestrupvej	Denmark	55.22	12.05	2015	MT170832	/	/
Seq810	DK16_17_LCO_17	Culicoides obsoletus	613	Leestrupvej	Denmark	55.22	12.05	2015	MT170833	/	/
Seq811	DK16_18_LCO_18	Culicoides obsoletus	613	Leestrupvej	Denmark	55.22	12.05	2015	MT170834	/	/
Seq812	DK16_19_LCO_19	Culicoides obsoletus	613	Leestrupvej	Denmark	55.22	12.05	2015	MT170835	/	/
Seq813	DK16_20_LCO_20	Culicoides obsoletus	613	Leestrupvej	Denmark	55.22	12.05	2015	MT170836	/	/
Seq814	DK16_21_LCO_21	Culicoides obsoletus	613	Leestrupvej	Denmark	55.22	12.05	2015	MT170837	/	/
Seq815	DK16_22_LCO_22	Culicoides scoticus	613	Leestrupvej	Denmark	55.22	12.05	2015	MT170838	/	/
Seq816	DK16_23_LCO_23	Culicoides scoticus	613	Leestrupvej	Denmark	55.22	12.05	2015	MT170839	/	/
Seq817	DK16_24_LCO_24	Culicoides obsoletus	613	Leestrupvej	Denmark	55.22	12.05	2015	MT170840	/	/
Seq818	DK16_25_LCO_25	Culicoides obsoletus	558	Leestrupvej	Denmark	55.22	12.05	2015	MT170841	/	/
Seq819	DK16_26_LCO_26	Culicoides scoticus	569	Leestrupvej	Denmark	55.22	12.05	2015	MT170842	/	/
Seq820	DK16_27_LCO_27	Culicoides obsoletus	613	Leestrupvej	Denmark	55.22	12.05	2015	MT170843	/	/
Seq821	DK16_30_LCO_30	Culicoides obsoletus	613	Leestrupvej	Denmark	55.22	12.05	2015	MT170844	/	/
Seq822	DK16_31_LCO_31	Culicoides obsoletus	613	Leestrupvej	Denmark	55.22	12.05	2015	MT170845	/	/
Seq823	DK16_32_LCO_32	Culicoides scoticus	613	Leestrupvej	Denmark	55.22	12.05	2015	MT170846	/	/
Seq824	DK17_01_LCO_33	Culicoides obsoletus	613	Lægdsgårdsvej	Denmark	56.12	9.12	2015	MT170847	/	/
Seq825	DK17_03_LCO_35	Culicoides obsoletus	613	Lægdsgårdsvej	Denmark	56.12	9.12	2015	MT170848	/	/
Seq826	DK17_04_LCO_36	Culicoides obsoletus	613	Lægdsgårdsvej	Denmark	56.12	9.12	2015	MT170849	/	/
Seq827	DK17_05_LCO_37	Culicoides obsoletus	613	Lægdsgårdsvej	Denmark	56.12	9.12	2015	MT170850	/	/
Seq828	DK17_06_LCO_38	Culicoides obsoletus	613	Lægdsgårdsvej	Denmark	56.12	9.12	2015	MT170851	/	/
Seq829	DK17_08_LCO_40	Culicoides obsoletus	572	Lægdsgårdsvej	Denmark	56.12	9.12	2015	MT170852	/	/
Seq830	DK17_10_LCO_42	Culicoides obsoletus	613	Lægdsgårdsvej	Denmark	56.12	9.12	2015	MT170853	/	/
Seq831	DK17_11_LCO_43	Culicoides obsoletus	613	Lægdsgårdsvej	Denmark	56.12	9.12	2015	MT170854	/	/
Seq832	DK17_12_LCO_44	Culicoides obsoletus	609	Lægdsgårdsvej	Denmark	56.12	9.12	2015	MT170855	/	/
Seq833	DK17_13_LCO_45	Culicoides obsoletus	613	Lægdsgårdsvej	Denmark	56.12	9.12	2015	MT170856	MT163094	MT175630
Seq834	DK17_15_LCO_47	Culicoides obsoletus	613	Lægdsgårdsvej	Denmark	56.12	9.12	2015	MT170857	/	/
Seq835	DK17_16_LCO_48	Culicoides scoticus	611	Lægdsgårdsvej	Denmark	56.12	9.12	2015	MT170858	/	/
Seq836	DK17_17_LCO_49	Culicoides scoticus	613	Lægdsgårdsvej	Denmark	56.12	9.12	2015	MT170859	/	/
Seq837	DK17_18_LCO_50	Culicoides scoticus	613	Lægdsgårdsvej	Denmark	56.12	9.12	2015	MT170860	/	/
Seq838	DK17_19_LCO_51	Culicoides obsoletus	614	Lægdsgårdsvej	Denmark	56.12	9.12	2015	MT170861	/	/
Seq839	DK17_20_LCO_52	Culicoides obsoletus	613	Lægdsgårdsvej	Denmark	56.12	9.12	2015	MT170862	/	/
Seq840	DK17_21_LCO_53	Culicoides scoticus	611	Lægdsgårdsvej	Denmark	56.12	9.12	2015	MT170863	/	/
Seq841	DK17_22_LCO_54	Culicoides obsoletus	611	Lægdsgårdsvej	Denmark	56.12	9.12	2015	MT170864	/	/
Seq842	DK17_23_LCO_55	Culicoides obsoletus	612	Lægdsgårdsvej	Denmark	56.12	9.12	2015	MT170865	/	/
Seq843	DK17_24_LCO_56	Culicoides obsoletus	613	Lægdsgårdsvej	Denmark	56.12	9.12	2015	MT170866	/	/
Seq844	DK17_25_LCO_57	Culicoides scoticus	611	Lægdsgårdsvej	Denmark	56.12	9.12	2015	MT170867	/	/
Seq845	DK17_26_LCO_58	Culicoides obsoletus	613	Lægdsgårdsvej	Denmark	56.12	9.12	2015	MT170868	/	/
Seq846	DK17_27_LCO_59	Culicoides obsoletus	611	Lægdsgårdsvej	Denmark	56.12	9.12	2015	MT170869	/	/
Seq847	DK17_28_LCO_60	Culicoides obsoletus	612	Lægdsgårdsvej	Denmark	56.12	9.12	2015	MT170870	/	/
Seq848	DK17_29_LCO_61	Culicoides obsoletus	613	Lægdsgårdsvej	Denmark	56.12	9.12	2015	MT170871	/	/
Seq849	DK17_30_LCO_62	Culicoides obsoletus	613	Lægdsgårdsvej	Denmark	56.12	9.12	2015	MT170872	/	/
Seq850	DK17_31_LCO_63	Culicoides scoticus	619	Lægdsgårdsvej	Denmark	56.12	9.12	2015	MT170873	/	/
Seq851	DK19_01_LCO_33	Culicoides obsoletus	613	Dyssevej	Denmark	55.2	12.11	2015	MT170874	/	/
Seq852	DK19_02_LCO_34	Culicoides obsoletus	611	Dyssevej	Denmark	55.2	12.11	2015	MT170875	/	/
Seq853	DK19_03_LCO_35	Culicoides obsoletus	605	Dyssevej	Denmark	55.2	12.11	2015	MT170876	/	/
Seq854	DK19_04_LCO_36	Culicoides obsoletus	613	Dyssevej	Denmark	55.2	12.11	2015	MT170877	/	/
Seq855	DK19_07_LCO_39	Culicoides obsoletus	613	Dyssevej	Denmark	55.2	12.11	2015	MT170878	/	/
Seq856	DK19_08_LCO_40	Culicoides obsoletus	613	Dyssevej	Denmark	55.2	12.11	2015	MT170879	/	/
Seq857	DK19_10_LCO_42	Culicoides obsoletus	613	Dyssevej	Denmark	55.2	12.11	2015	MT170880	/	/
Seq858	DK19_11_LCO_43	Culicoides obsoletus	613	Dyssevej	Denmark	55.2	12.11	2015	MT170881	/	/
Seq859	DK19_12_LCO_44	Culicoides obsoletus	613	Dyssevej	Denmark	55.2	12.11	2015	MT170882	/	/
Seq860	DK19_13_LCO_45	Culicoides obsoletus	613	Dyssevej	Denmark	55.2	12.11	2015	MT170883	/	/
Seq861	DK19_14_LCO_46	Culicoides obsoletus	613	Dyssevej	Denmark	55.2	12.11	2015	MT170884	/	/
Seq862	DK19_15_LCO_47	Culicoides obsoletus	613	Dyssevej	Denmark	55.2	12.11	2015	MT170885	/	/
Seq863	DK19_16_LCO_48	Culicoides obsoletus	613	Dyssevej	Denmark	55.2	12.11	2015	MT170886	/	/
Seq864	DK19_18_LCO_50	Culicoides obsoletus	613	Dyssevej	Denmark	55.2	12.11	2015	MT170887	/	/
Seq865	DK19_19_LCO_51	Culicoides obsoletus	613	Dyssevej	Denmark	55.2	12.11	2015	MT170888	/	/
Seq866	DK19_20_LCO_52	Culicoides obsoletus	614	Dyssevej	Denmark	55.2	12.11	2015	MT170889	/	/
Seq867	DK19_22_LCO_54	Culicoides obsoletus	613	Dyssevej	Denmark	55.2	12.11	2015	MT170890	/	/
Seq868	DK19_23_LCO_55	Culicoides obsoletus	614	Dyssevej	Denmark	55.2	12.11	2015	MT170891	/	/
Seq869	DK19_24_LCO_56	Culicoides obsoletus	613	Dyssevej	Denmark	55.2	12.11	2015	MT170892	/	/
Seq870	DK19_25_LCO_57	Culicoides obsoletus	613	Dyssevej	Denmark	55.2	12.11	2015	MT170893	/	/
Seq871	DK19_26_LCO_58	Culicoides obsoletus	612	Dyssevej	Denmark	55.2	12.11	2015	MT170894	/	/
Seq872	DK19_28_LCO_60	Culicoides obsoletus	613	Dyssevej	Denmark	55.2	12.11	2015	MT170895	/	/
Seq873	DK19_29_LCO_61	Culicoides obsoletus	613	Dyssevej	Denmark	55.2	12.11	2015	MT170896	/	/
Seq874	DK19_30_LCO_62	Culicoides obsoletus	613	Dyssevej	Denmark	55.2	12.11	2015	MT170897	/	/
Seq875	DK19_31_LCO_63	Culicoides obsoletus	613	Dyssevej	Denmark	55.2	12.11	2015	MT170898	/	/
Seq876	DK19_32_LCO_64	Culicoides obsoletus	613	Dyssevej	Denmark	55.2	12.11	2015	MT170899	/	/
Seq877	DK2_02_LCO_2	Culicoides obsoletus	613	Grøddevej	Denmark	56.13	9.18	2015	MT170900	/	/
Seq878	DK2_03_LCO_3	Culicoides obsoletus	613	Grøddevej	Denmark	56.13	9.18	2015	MT170901	/	/
Seq879	DK2_04_LCO_4	Culicoides obsoletus	613	Grøddevej	Denmark	56.13	9.18	2015	MT170902	/	/
Seq880	DK2_05_LCO_5	Culicoides obsoletus	612	Grøddevej	Denmark	56.13	9.18	2015	MT170903	/	/
Seq881	DK2_06_LCO_6	Culicoides scoticus	613	Grøddevej	Denmark	56.13	9.18	2015	MT170904	/	/
Seq882	DK2_07_LCO_7	Culicoides obsoletus	614	Grøddevej	Denmark	56.13	9.18	2015	MT170905	/	/
Seq883	DK2_08_LCO_8	Culicoides obsoletus	612	Grøddevej	Denmark	56.13	9.18	2015	MT170906	MT163095	MT175631
Seq884	DK2_09_LCO_9	Culicoides obsoletus	613	Grøddevej	Denmark	56.13	9.18	2015	MT170907	MT163096	MT175632
Seq885	DK2_10_LCO_10	Culicoides obsoletus	613	Grøddevej	Denmark	56.13	9.18	2015	MT170908	/	/
Seq886	DK2_11_LCO_11	Culicoides obsoletus	613	Grøddevej	Denmark	56.13	9.18	2015	MT170909	/	/
Seq887	DK2_15_LCO_15	Culicoides obsoletus	613	Grøddevej	Denmark	56.13	9.18	2015	MT170910	/	/
Seq888	DK2_16_LCO_16	Culicoides obsoletus	614	Grøddevej	Denmark	56.13	9.18	2015	MT170911	/	/
Seq889	DK2_18_LCO_18	Culicoides obsoletus	613	Grøddevej	Denmark	56.13	9.18	2015	MT170912	/	/
Seq890	DK2_19_LCO_19	Culicoides obsoletus	613	Grøddevej	Denmark	56.13	9.18	2015	MT170913	/	/
Seq891	DK2_20_LCO_20	Culicoides obsoletus	615	Grøddevej	Denmark	56.13	9.18	2015	MT170914	/	/
Seq892	DK2_21_LCO_21	Culicoides obsoletus	613	Grøddevej	Denmark	56.13	9.18	2015	MT170915	/	/
Seq893	DK2_22_LCO_22	Culicoides obsoletus	613	Grøddevej	Denmark	56.13	9.18	2015	MT170916	/	/
Seq894	DK2_23_LCO_23	Culicoides scoticus	613	Grøddevej	Denmark	56.13	9.18	2015	MT170917	/	/
Seq895	DK2_25_LCO_25	Culicoides obsoletus	615	Grøddevej	Denmark	56.13	9.18	2015	MT170918	MT163097	MT175633
Seq896	DK2_27_LCO_27	Culicoides obsoletus	613	Grøddevej	Denmark	56.13	9.18	2015	MT170919	/	/
Seq897	DK2_28_LCO_28	Culicoides scoticus	614	Grøddevej	Denmark	56.13	9.18	2015	MT170920	/	/
Seq898	DK2_29_LCO_29	Culicoides obsoletus	615	Grøddevej	Denmark	56.13	9.18	2015	MT170921	/	/
Seq899	DK2_30_LCO_30	Culicoides obsoletus	613	Grøddevej	Denmark	56.13	9.18	2015	MT170922	MT163098	MT175634
Seq900	DK2_31_LCO_31	Culicoides obsoletus	613	Grøddevej	Denmark	56.13	9.18	2015	MT170923	/	/
Seq901	DK2_32_LCO_32	Culicoides obsoletus	613	Grøddevej	Denmark	56.13	9.18	2015	MT170924	MT163099	MT175635
Seq902	DK20_02_LCO_34	Culicoides obsoletus	613	Leestrupvej	Denmark	55.22	12.05	2015	MT170925	/	/
Seq903	DK20_03_LCO_35	Culicoides scoticus	613	Leestrupvej	Denmark	55.22	12.05	2015	MT170926	/	/
Seq904	DK20_04_LCO_36	Culicoides obsoletus	613	Leestrupvej	Denmark	55.22	12.05	2015	MT170927	/	/
Seq905	DK20_06_LCO_38	Culicoides scoticus	614	Leestrupvej	Denmark	55.22	12.05	2015	MT170928	/	/
Seq906	DK20_07_LCO_39	Culicoides scoticus	613	Leestrupvej	Denmark	55.22	12.05	2015	MT170929	/	/
Seq907	DK20_08_LCO_40	Culicoides obsoletus	613	Leestrupvej	Denmark	55.22	12.05	2015	MT170930	/	/
Seq908	DK20_09_LCO_41	Culicoides obsoletus	613	Leestrupvej	Denmark	55.22	12.05	2015	MT170931	/	/
Seq909	DK20_10_LCO_42	Culicoides scoticus	613	Leestrupvej	Denmark	55.22	12.05	2015	MT170932	/	/
Seq910	DK20_11_LCO_43	Culicoides scoticus	613	Leestrupvej	Denmark	55.22	12.05	2015	MT170933	/	/
Seq911	DK20_12_LCO_44	Culicoides obsoletus	613	Leestrupvej	Denmark	55.22	12.05	2015	MT170934	/	/
Seq912	DK20_14_LCO_46	Culicoides scoticus	613	Leestrupvej	Denmark	55.22	12.05	2015	MT170935	/	/
Seq913	DK20_15_LCO_47	Culicoides obsoletus	613	Leestrupvej	Denmark	55.22	12.05	2015	MT170936	/	/
Seq914	DK20_16_LCO_48	Culicoides scoticus	613	Leestrupvej	Denmark	55.22	12.05	2015	MT170937	/	/
Seq915	DK20_18_LCO_50	Culicoides obsoletus	613	Leestrupvej	Denmark	55.22	12.05	2015	MT170938	/	/
Seq916	DK20_22_LCO_54	Culicoides scoticus	613	Leestrupvej	Denmark	55.22	12.05	2015	MT170939	/	/
Seq917	DK20_23_LCO_55	Culicoides obsoletus	613	Leestrupvej	Denmark	55.22	12.05	2015	MT170940	/	/
Seq918	DK20_27_LCO_59	Culicoides scoticus	614	Leestrupvej	Denmark	55.22	12.05	2015	MT170941	/	/
Seq919	DK20_28_LCO_60	Culicoides scoticus	613	Leestrupvej	Denmark	55.22	12.05	2015	MT170942	/	/
Seq920	DK20_31_LCO_63	Culicoides obsoletus	613	Leestrupvej	Denmark	55.22	12.05	2015	MT170943	/	/
Seq921	DK21_01_LCO_65	Culicoides obsoletus	613	Lægdsgårdsvej	Denmark	56.12	9.12	2015	MT170944	/	/
Seq922	DK21_02_LCO_66	Culicoides obsoletus	613	Lægdsgårdsvej	Denmark	56.12	9.12	2015	MT170945	MT163100	MT175636
Seq923	DK21_03_LCO_67	Culicoides obsoletus	613	Lægdsgårdsvej	Denmark	56.12	9.12	2015	MT170946	/	/
Seq924	DK21_04_LCO_68	Culicoides obsoletus	613	Lægdsgårdsvej	Denmark	56.12	9.12	2015	MT170947	/	/
Seq925	DK21_05_LCO_69	Culicoides obsoletus	616	Lægdsgårdsvej	Denmark	56.12	9.12	2015	MT170948	MT163101	MT175637
Seq926	DK21_06_LCO_70	Culicoides obsoletus	613	Lægdsgårdsvej	Denmark	56.12	9.12	2015	MT170949	/	/
Seq927	DK21_07_LCO_71	Culicoides obsoletus	613	Lægdsgårdsvej	Denmark	56.12	9.12	2015	MT170950	/	/
Seq928	DK21_08_LCO_72	Culicoides obsoletus	613	Lægdsgårdsvej	Denmark	56.12	9.12	2015	MT170951	/	/
Seq929	DK21_10_LCO_74	Culicoides scoticus	613	Lægdsgårdsvej	Denmark	56.12	9.12	2015	MT170952	/	/
Seq930	DK21_11_LCO_75	Culicoides obsoletus	613	Lægdsgårdsvej	Denmark	56.12	9.12	2015	MT170953	/	/
Seq931	DK21_12_LCO_76	Culicoides obsoletus	613	Lægdsgårdsvej	Denmark	56.12	9.12	2015	MT170954	/	/
Seq932	DK21_13_LCO_77	Culicoides obsoletus	615	Lægdsgårdsvej	Denmark	56.12	9.12	2015	MT170955	/	/
Seq933	DK21_14_LCO_78	Culicoides obsoletus	613	Lægdsgårdsvej	Denmark	56.12	9.12	2015	MT170956	/	/
Seq934	DK21_15_LCO_79	Culicoides obsoletus	614	Lægdsgårdsvej	Denmark	56.12	9.12	2015	MT170957	/	/
Seq935	DK21_16_LCO_80	Culicoides obsoletus	613	Lægdsgårdsvej	Denmark	56.12	9.12	2015	MT170958	/	/
Seq936	DK21_17_LCO_81	Culicoides obsoletus	611	Lægdsgårdsvej	Denmark	56.12	9.12	2015	MT170959	/	/
Seq937	DK21_18_LCO_82	Culicoides scoticus	611	Lægdsgårdsvej	Denmark	56.12	9.12	2015	MT170960	/	/
Seq938	DK21_20_LCO_84	Culicoides obsoletus	613	Lægdsgårdsvej	Denmark	56.12	9.12	2015	MT170961	/	/
Seq939	DK21_21_LCO_85	Culicoides obsoletus	611	Lægdsgårdsvej	Denmark	56.12	9.12	2015	MT170962	/	/
Seq940	DK21_22_LCO_86	Culicoides obsoletus	613	Lægdsgårdsvej	Denmark	56.12	9.12	2015	MT170963	/	/
Seq941	DK21_23_LCO_87	Culicoides obsoletus	612	Lægdsgårdsvej	Denmark	56.12	9.12	2015	MT170964	/	/
Seq942	DK21_24_LCO_88	Culicoides obsoletus	613	Lægdsgårdsvej	Denmark	56.12	9.12	2015	MT170965	MT163102	MT175638
Seq943	DK21_25_LCO_89	Culicoides obsoletus	613	Lægdsgårdsvej	Denmark	56.12	9.12	2015	MT170966	/	/
Seq944	DK21_26_LCO_90	Culicoides scoticus	612	Lægdsgårdsvej	Denmark	56.12	9.12	2015	MT170967	/	/
Seq945	DK21_27_LCO_91	Culicoides obsoletus	613	Lægdsgårdsvej	Denmark	56.12	9.12	2015	MT170968	MT163103	MT175639
Seq946	DK22_01_LCO_65	Culicoides obsoletus	613	Grøddevej	Denmark	56.13	9.18	2015	MT170969	/	/
Seq947	DK22_04_LCO_68	Culicoides obsoletus	611	Grøddevej	Denmark	56.13	9.18	2015	MT170970	/	/
Seq948	DK22_05_LCO_69	Culicoides scoticus clade 2	603	Grøddevej	Denmark	56.13	9.18	2015	MT170971	/	/
Seq949	DK22_06_LCO_70	Culicoides obsoletus	611	Grøddevej	Denmark	56.13	9.18	2015	MT170972	/	/
Seq950	DK22_07_LCO_71	Culicoides obsoletus	610	Grøddevej	Denmark	56.13	9.18	2015	MT170973	/	/
Seq951	DK22_09_LCO_73	Culicoides scoticus	613	Grøddevej	Denmark	56.13	9.18	2015	MT170974	/	/
Seq952	DK22_13_LCO_77	Culicoides obsoletus	611	Grøddevej	Denmark	56.13	9.18	2015	MT170975	/	/
Seq953	DK22_16_LCO_80	Culicoides obsoletus	613	Grøddevej	Denmark	56.13	9.18	2015	MT170976	/	/
Seq954	DK22_19_LCO_83	Culicoides scoticus	613	Grøddevej	Denmark	56.13	9.18	2015	MT170977	/	/
Seq955	DK22_20_LCO_84	Culicoides obsoletus	613	Grøddevej	Denmark	56.13	9.18	2015	MT170978	/	/
Seq956	DK22_21_LCO_85	Culicoides scoticus	613	Grøddevej	Denmark	56.13	9.18	2015	MT170979	/	/
Seq957	DK22_22_LCO_86	Culicoides obsoletus	613	Grøddevej	Denmark	56.13	9.18	2015	MT170980	/	/
Seq958	DK22_23_LCO_87	Culicoides obsoletus	613	Grøddevej	Denmark	56.13	9.18	2015	MT170981	/	/
Seq959	DK22_26_LCO_90	Culicoides obsoletus	613	Grøddevej	Denmark	56.13	9.18	2015	MT170982	/	/
Seq960	DK22_27_LCO_91	Culicoides obsoletus	613	Grøddevej	Denmark	56.13	9.18	2015	MT170983	/	/
Seq961	DK22_28_LCO_92	Culicoides obsoletus	613	Grøddevej	Denmark	56.13	9.18	2015	MT170984	/	/
Seq962	DK22_29_LCO_93	Culicoides scoticus	613	Grøddevej	Denmark	56.13	9.18	2015	MT170985	/	/
Seq963	DK22_30_LCO_94	Culicoides obsoletus	613	Grøddevej	Denmark	56.13	9.18	2015	MT170986	/	/
Seq964	DK23_01_LCO_65	Culicoides obsoletus	613	Leestrupvej	Denmark	55.22	12.05	2015	MT170987	/	/
Seq965	DK23_02_LCO_66	Culicoides obsoletus	613	Leestrupvej	Denmark	55.22	12.05	2015	MT170988	/	/
Seq966	DK23_03_LCO_67	Culicoides obsoletus	613	Leestrupvej	Denmark	55.22	12.05	2015	MT170989	/	/
Seq967	DK23_04_LCO_68	Culicoides obsoletus	613	Leestrupvej	Denmark	55.22	12.05	2015	MT170990	/	/
Seq968	DK23_05_LCO_69	Culicoides obsoletus	613	Leestrupvej	Denmark	55.22	12.05	2015	MT170991	/	/
Seq969	DK23_06_LCO_70	Culicoides obsoletus	613	Leestrupvej	Denmark	55.22	12.05	2015	MT170992	/	/
Seq970	DK23_07_LCO_71	Culicoides obsoletus	613	Leestrupvej	Denmark	55.22	12.05	2015	MT170993	/	/
Seq971	DK23_08_LCO_72	Culicoides obsoletus	613	Leestrupvej	Denmark	55.22	12.05	2015	MT170994	/	/
Seq972	DK23_09_LCO_73	Culicoides obsoletus	613	Leestrupvej	Denmark	55.22	12.05	2015	MT170995	/	/
Seq973	DK23_10_LCO_74	Culicoides obsoletus	613	Leestrupvej	Denmark	55.22	12.05	2015	MT170996	/	/
Seq974	DK23_11_LCO_75	Culicoides obsoletus	613	Leestrupvej	Denmark	55.22	12.05	2015	MT170997	/	/
Seq975	DK23_12_LCO_76	Culicoides obsoletus	614	Leestrupvej	Denmark	55.22	12.05	2015	MT170998	/	/
Seq976	DK23_13_LCO_77	Culicoides obsoletus	613	Leestrupvej	Denmark	55.22	12.05	2015	MT170999	/	/
Seq977	DK23_14_LCO_78	Culicoides obsoletus	613	Leestrupvej	Denmark	55.22	12.05	2015	MT171000	/	/
Seq978	DK23_15_LCO_79	Culicoides obsoletus	613	Leestrupvej	Denmark	55.22	12.05	2015	MT171001	/	/
Seq979	DK23_16_LCO_80	Culicoides obsoletus	613	Leestrupvej	Denmark	55.22	12.05	2015	MT171002	/	/
Seq980	DK23_17_LCO_81	Culicoides obsoletus	613	Leestrupvej	Denmark	55.22	12.05	2015	MT171003	/	/
Seq981	DK23_18_LCO_82	Culicoides obsoletus	613	Leestrupvej	Denmark	55.22	12.05	2015	MT171004	/	/
Seq982	DK23_19_LCO_83	Culicoides obsoletus	613	Leestrupvej	Denmark	55.22	12.05	2015	MT171005	/	/
Seq983	DK23_20_LCO_84	Culicoides obsoletus	613	Leestrupvej	Denmark	55.22	12.05	2015	MT171006	/	/
Seq984	DK23_22_LCO_86	Culicoides obsoletus	613	Leestrupvej	Denmark	55.22	12.05	2015	MT171007	/	/
Seq985	DK23_23_LCO_87	Culicoides obsoletus	613	Leestrupvej	Denmark	55.22	12.05	2015	MT171008	/	/
Seq986	DK23_24_LCO_88	Culicoides obsoletus	613	Leestrupvej	Denmark	55.22	12.05	2015	MT171009	/	/
Seq987	DK23_25_LCO_89	Culicoides obsoletus	613	Leestrupvej	Denmark	55.22	12.05	2015	MT171010	/	/
Seq988	DK23_26_LCO_90	Culicoides obsoletus	613	Leestrupvej	Denmark	55.22	12.05	2015	MT171011	/	/
Seq989	DK23_27_LCO_91	Culicoides obsoletus	614	Leestrupvej	Denmark	55.22	12.05	2015	MT171012	/	/
Seq990	DK23_28_LCO_92	Culicoides obsoletus	612	Leestrupvej	Denmark	55.22	12.05	2015	MT171013	/	/
Seq991	DK23_29_LCO_93	Culicoides obsoletus	616	Leestrupvej	Denmark	55.22	12.05	2015	MT171014	/	/
Seq992	DK23_30_LCO_94	Culicoides obsoletus	613	Leestrupvej	Denmark	55.22	12.05	2015	MT171015	/	/
Seq993	DK24_01_LCO_65	Culicoides obsoletus	616	Leestrupvej	Denmark	55.22	12.05	2015	MT171016	/	/
Seq994	DK24_02_LCO_66	Culicoides obsoletus	613	Leestrupvej	Denmark	55.22	12.05	2015	MT171017	/	/
Seq995	DK24_03_LCO_67	Culicoides scoticus	617	Leestrupvej	Denmark	55.22	12.05	2015	MT171018	/	/
Seq996	DK24_05_LCO_69	Culicoides scoticus	613	Leestrupvej	Denmark	55.22	12.05	2015	MT171019	/	/
Seq997	DK24_07_LCO_71	Culicoides scoticus	613	Leestrupvej	Denmark	55.22	12.05	2015	MT171020	/	/
Seq998	DK24_08_LCO_72	Culicoides obsoletus	612	Leestrupvej	Denmark	55.22	12.05	2015	MT171021	/	/
Seq999	DK24_10_LCO_74	Culicoides obsoletus	613	Leestrupvej	Denmark	55.22	12.05	2015	MT171022	/	/
Seq1000	DK24_12_LCO_76	Culicoides scoticus	613	Leestrupvej	Denmark	55.22	12.05	2015	MT171023	/	/
Seq1001	DK24_14_LCO_78	Culicoides scoticus	615	Leestrupvej	Denmark	55.22	12.05	2015	MT171024	/	/
Seq1002	DK24_15_LCO_79	Culicoides obsoletus	613	Leestrupvej	Denmark	55.22	12.05	2015	MT171025	/	/
Seq1003	DK24_16_LCO_80	Culicoides scoticus	617	Leestrupvej	Denmark	55.22	12.05	2015	MT171026	/	/
Seq1004	DK24_17_LCO_81	Culicoides obsoletus	613	Leestrupvej	Denmark	55.22	12.05	2015	MT171027	/	/
Seq1005	DK24_18_LCO_82	Culicoides scoticus	613	Leestrupvej	Denmark	55.22	12.05	2015	MT171028	/	/
Seq1006	DK24_19_LCO_83	Culicoides scoticus	613	Leestrupvej	Denmark	55.22	12.05	2015	MT171029	/	/
Seq1007	DK24_20_LCO_84	Culicoides scoticus	614	Leestrupvej	Denmark	55.22	12.05	2015	MT171030	/	/
Seq1008	DK24_21_LCO_85	Culicoides obsoletus	613	Leestrupvej	Denmark	55.22	12.05	2015	MT171031	/	/
Seq1009	DK24_22_LCO_86	Culicoides obsoletus	613	Leestrupvej	Denmark	55.22	12.05	2015	MT171032	/	/
Seq1010	DK24_23_LCO_87	Culicoides scoticus	613	Leestrupvej	Denmark	55.22	12.05	2015	MT171033	/	/
Seq1011	DK24_26_LCO_90	Culicoides obsoletus	613	Leestrupvej	Denmark	55.22	12.05	2015	MT171034	/	/
Seq1012	DK24_27_LCO_91	Culicoides scoticus	614	Leestrupvej	Denmark	55.22	12.05	2015	MT171035	/	/
Seq1013	DK24_28_LCO_92	Culicoides obsoletus	613	Leestrupvej	Denmark	55.22	12.05	2015	MT171036	/	/
Seq1014	DK24_30_LCO_94	Culicoides scoticus	613	Leestrupvej	Denmark	55.22	12.05	2015	MT171037	/	/
Seq1015	DK3_01_LCO_1	Culicoides obsoletus	613	Dyssevej	Denmark	55.2	12.11	2015	MT171038	/	/
Seq1016	DK3_02_LCO_2	Culicoides obsoletus	613	Dyssevej	Denmark	55.2	12.11	2015	MT171039	/	/
Seq1017	DK3_03_LCO_3	Culicoides obsoletus	613	Dyssevej	Denmark	55.2	12.11	2015	MT171040	/	/
Seq1018	DK3_04_LCO_4	Culicoides obsoletus	613	Dyssevej	Denmark	55.2	12.11	2015	MT171041	/	/
Seq1019	DK3_05_LCO_5	Culicoides obsoletus clade O2	613	Dyssevej	Denmark	55.2	12.11	2015	MT171042	/	/
Seq1020	DK3_06_LCO_6	Culicoides obsoletus	614	Dyssevej	Denmark	55.2	12.11	2015	MT171043	/	/
Seq1021	DK3_09_LCO_9	Culicoides obsoletus clade O2	613	Dyssevej	Denmark	55.2	12.11	2015	MT171044	MT163104	MT175640
Seq1022	DK3_10_LCO_10	Culicoides obsoletus	613	Dyssevej	Denmark	55.2	12.11	2015	MT171045	/	/
Seq1023	DK3_11_LCO_11	Culicoides obsoletus	613	Dyssevej	Denmark	55.2	12.11	2015	MT171046	/	/
Seq1024	DK3_12_LCO_12	Culicoides obsoletus clade O2	613	Dyssevej	Denmark	55.2	12.11	2015	MT171047	/	/
Seq1025	DK3_14_LCO_14	Culicoides obsoletus	613	Dyssevej	Denmark	55.2	12.11	2015	MT171048	/	/
Seq1026	DK3_15_LCO_15	Culicoides obsoletus clade O2	613	Dyssevej	Denmark	55.2	12.11	2015	MT171049	/	/
Seq1027	DK3_16_LCO_16	Culicoides obsoletus clade O2	613	Dyssevej	Denmark	55.2	12.11	2015	MT171050	/	/
Seq1028	DK3_17_LCO_17	Culicoides obsoletus clade O2	613	Dyssevej	Denmark	55.2	12.11	2015	MT171051	/	/
Seq1029	DK3_18_LCO_18	Culicoides obsoletus clade O2	613	Dyssevej	Denmark	55.2	12.11	2015	MT171052	/	/
Seq1030	DK3_19_LCO_19	Culicoides obsoletus clade O2	613	Dyssevej	Denmark	55.2	12.11	2015	MT171053	/	/
Seq1031	DK3_20_LCO_20	Culicoides obsoletus clade O2	613	Dyssevej	Denmark	55.2	12.11	2015	MT171054	/	/
Seq1032	DK3_21_LCO_21	Culicoides obsoletus	613	Dyssevej	Denmark	55.2	12.11	2015	MT171055	/	/
Seq1033	DK3_22_LCO_22	Culicoides obsoletus clade O2	613	Dyssevej	Denmark	55.2	12.11	2015	MT171056	/	/
Seq1034	DK3_23_LCO_23	Culicoides obsoletus	614	Dyssevej	Denmark	55.2	12.11	2015	MT171057	/	/
Seq1035	DK3_24_LCO_24	Culicoides obsoletus	613	Dyssevej	Denmark	55.2	12.11	2015	MT171058	/	/
Seq1036	DK3_25_LCO_25	Culicoides obsoletus clade O2	613	Dyssevej	Denmark	55.2	12.11	2015	MT171059	MT163105	MT175641
Seq1037	DK3_26_LCO_26	Culicoides obsoletus clade O2	613	Dyssevej	Denmark	55.2	12.11	2015	MT171060	/	/
Seq1038	DK3_27_LCO_27	Culicoides obsoletus	613	Dyssevej	Denmark	55.2	12.11	2015	MT171061	/	/
Seq1039	DK3_28_LCO_28	Culicoides obsoletus	613	Dyssevej	Denmark	55.2	12.11	2015	MT171062	/	/
Seq1040	DK3_29_LCO_29	Culicoides obsoletus clade O2	613	Dyssevej	Denmark	55.2	12.11	2015	MT171063	/	/
Seq1041	DK3_30_LCO_30	Culicoides obsoletus	613	Dyssevej	Denmark	55.2	12.11	2015	MT171064	/	/
Seq1042	DK4_01_LCO_1	Culicoides scoticus	613	Leestrupvej	Denmark	55.22	12.05	2015	MT171065	/	/
Seq1043	DK4_02_LCO_2	Culicoides scoticus	613	Leestrupvej	Denmark	55.22	12.05	2015	MT171066	/	/
Seq1044	DK4_02_LCO_92	Culicoides obsoletus	615	Leestrupvej	Denmark	55.22	12.05	2015	MT171067	/	/
Seq1045	DK4_03_LCO_3	Culicoides scoticus	613	Leestrupvej	Denmark	55.22	12.05	2015	MT171068	/	/
Seq1046	DK4_03_LCO_93	Culicoides obsoletus	613	Leestrupvej	Denmark	55.22	12.05	2015	MT171069	/	/
Seq1047	DK4_04_LCO_4	Culicoides scoticus	614	Leestrupvej	Denmark	55.22	12.05	2015	MT171070	/	/
Seq1048	DK4_04_LCO_94	Culicoides scoticus	613	Leestrupvej	Denmark	55.22	12.05	2015	MT171071	/	/
Seq1049	DK4_05_LCO_5	Culicoides scoticus	614	Leestrupvej	Denmark	55.22	12.05	2015	MT171072	/	/
Seq1050	DK4_06_LCO_6	Culicoides scoticus	613	Leestrupvej	Denmark	55.22	12.05	2015	MT171073	/	/
Seq1051	DK4_08_LCO_8	Culicoides scoticus	613	Leestrupvej	Denmark	55.22	12.05	2015	MT171074	/	/
Seq1052	DK4_09_LCO_9	Culicoides scoticus	614	Leestrupvej	Denmark	55.22	12.05	2015	MT171075	/	/
Seq1053	DK4_10_LCO_10	Culicoides scoticus	613	Leestrupvej	Denmark	55.22	12.05	2015	MT171076	/	/
Seq1054	DK4_11_LCO_11	Culicoides scoticus	614	Leestrupvej	Denmark	55.22	12.05	2015	MT171077	/	/
Seq1055	DK4_12_LCO_12	Culicoides scoticus	613	Leestrupvej	Denmark	55.22	12.05	2015	MT171078	/	/
Seq1056	DK4_13_LCO_13	Culicoides scoticus	613	Leestrupvej	Denmark	55.22	12.05	2015	MT171079	/	/
Seq1057	DK4_14_LCO_14	Culicoides scoticus	612	Leestrupvej	Denmark	55.22	12.05	2015	MT171080	/	/
Seq1058	DK4_15_LCO_15	Culicoides scoticus	613	Leestrupvej	Denmark	55.22	12.05	2015	MT171081	/	/
Seq1059	DK4_16_LCO_16	Culicoides obsoletus	613	Leestrupvej	Denmark	55.22	12.05	2015	MT171082	/	/
Seq1060	DK4_17_LCO_17	Culicoides scoticus	613	Leestrupvej	Denmark	55.22	12.05	2015	MT171083	/	/
Seq1061	DK4_18_LCO_18	Culicoides scoticus	613	Leestrupvej	Denmark	55.22	12.05	2015	MT171084	/	/
Seq1062	DK4_19_LCO_19	Culicoides scoticus	612	Leestrupvej	Denmark	55.22	12.05	2015	MT171085	/	/
Seq1063	DK4_20_LCO_20	Culicoides scoticus	616	Leestrupvej	Denmark	55.22	12.05	2015	MT171086	/	/
Seq1064	DK4_21_LCO_21	Culicoides scoticus	613	Leestrupvej	Denmark	55.22	12.05	2015	MT171087	MT163106	MT175642
Seq1065	DK4_22_LCO_22	Culicoides scoticus	613	Leestrupvej	Denmark	55.22	12.05	2015	MT171088	MT163111	MT175647
Seq1066	DK4_23_LCO_23	Culicoides scoticus	613	Leestrupvej	Denmark	55.22	12.05	2015	MT171089	/	/
Seq1067	DK4_24_LCO_24	Culicoides scoticus	613	Leestrupvej	Denmark	55.22	12.05	2015	MT171090	/	/
Seq1068	DK4_25_LCO_25	Culicoides scoticus	614	Leestrupvej	Denmark	55.22	12.05	2015	MT171091	/	/
Seq1069	DK4_26_LCO_26	Culicoides scoticus	613	Leestrupvej	Denmark	55.22	12.05	2015	MT171092	/	/
Seq1070	DK4_27_LCO_27	Culicoides scoticus	613	Leestrupvej	Denmark	55.22	12.05	2015	MT171093	/	/
Seq1071	DK4_28_LCO_28	Culicoides scoticus	613	Leestrupvej	Denmark	55.22	12.05	2015	MT171094	/	/
Seq1072	DK4_29_LCO_29	Culicoides obsoletus clade O2	613	Leestrupvej	Denmark	55.22	12.05	2015	MT171095	/	/
Seq1073	DK4_30_LCO_30	Culicoides obsoletus clade O2	585	Leestrupvej	Denmark	55.22	12.05	2015	MT171096	/	/
Seq1074	DK4_31_LCO_31	Culicoides scoticus	617	Leestrupvej	Denmark	55.22	12.05	2015	MT171097	/	/
Seq1075	DK4_32_LCO_32	Culicoides obsoletus clade O2	614	Leestrupvej	Denmark	55.22	12.05	2015	MT171098	/	/
Seq1076	DK5_01_LCO_31	Culicoides obsoletus	616	Dyssevej	Denmark	55.2	12.11	2015	MT171099	/	/
Seq1077	DK5_02_LCO_32	Culicoides obsoletus clade O2	613	Dyssevej	Denmark	55.2	12.11	2015	MT171100	/	/
Seq1078	DK5_03_LCO_33	Culicoides obsoletus clade O2	613	Dyssevej	Denmark	55.2	12.11	2015	MT171101	/	/
Seq1079	DK5_04_LCO_34	Culicoides obsoletus	616	Dyssevej	Denmark	55.2	12.11	2015	MT171102	/	/
Seq1080	DK5_05_LCO_35	Culicoides obsoletus	616	Dyssevej	Denmark	55.2	12.11	2015	MT171103	/	/
Seq1081	DK5_06_LCO_36	Culicoides obsoletus clade O2	618	Dyssevej	Denmark	55.2	12.11	2015	MT171104	/	/
Seq1082	DK5_07_LCO_37	Culicoides obsoletus	620	Dyssevej	Denmark	55.2	12.11	2015	MT171105	/	/
Seq1083	DK5_08_LCO_38	Culicoides obsoletus	613	Dyssevej	Denmark	55.2	12.11	2015	MT171106	/	/
Seq1084	DK5_09_LCO_39	Culicoides obsoletus	613	Dyssevej	Denmark	55.2	12.11	2015	MT171107	/	/
Seq1085	DK5_10_LCO_40	Culicoides obsoletus	616	Dyssevej	Denmark	55.2	12.11	2015	MT171108	/	/
Seq1086	DK5_11_LCO_41	Culicoides obsoletus	617	Dyssevej	Denmark	55.2	12.11	2015	MT171109	/	/
Seq1087	DK5_12_LCO_42	Culicoides obsoletus clade O2	617	Dyssevej	Denmark	55.2	12.11	2015	MT171110	/	/
Seq1088	DK5_13_LCO_43	Culicoides obsoletus clade O2	614	Dyssevej	Denmark	55.2	12.11	2015	MT171111	/	/
Seq1089	DK5_14_LCO_44	Culicoides obsoletus	617	Dyssevej	Denmark	55.2	12.11	2015	MT171112	/	/
Seq1090	DK5_15_LCO_45	Culicoides obsoletus	616	Dyssevej	Denmark	55.2	12.11	2015	MT171113	/	/
Seq1091	DK5_16_LCO_46	Culicoides obsoletus	619	Dyssevej	Denmark	55.2	12.11	2015	MT171114	/	/
Seq1092	DK5_17_LCO_47	Culicoides obsoletus	620	Dyssevej	Denmark	55.2	12.11	2015	MT171115	MT163112	MT175648
Seq1093	DK5_18_LCO_48	Culicoides obsoletus	613	Dyssevej	Denmark	55.2	12.11	2015	MT171116	/	/
Seq1094	DK5_19_LCO_49	Culicoides obsoletus clade O2	615	Dyssevej	Denmark	55.2	12.11	2015	MT171117	/	/
Seq1095	DK5_20_LCO_50	Culicoides obsoletus clade O2	613	Dyssevej	Denmark	55.2	12.11	2015	MT171118	/	/
Seq1096	DK5_21_LCO_51	Culicoides obsoletus	614	Dyssevej	Denmark	55.2	12.11	2015	MT171119	/	/
Seq1097	DK5_22_LCO_52	Culicoides obsoletus	614	Dyssevej	Denmark	55.2	12.11	2015	MT171120	/	/
Seq1098	DK5_23_LCO_53	Culicoides obsoletus clade O2	558	Dyssevej	Denmark	55.2	12.11	2015	MT171121	/	/
Seq1099	DK5_24_LCO_54	Culicoides obsoletus	614	Dyssevej	Denmark	55.2	12.11	2015	MT171122	/	/
Seq1100	DK5_25_LCO_55	Culicoides obsoletus	614	Dyssevej	Denmark	55.2	12.11	2015	MT171123	/	/
Seq1101	DK5_26_LCO_56	Culicoides obsoletus	616	Dyssevej	Denmark	55.2	12.11	2015	MT171124	/	/
Seq1102	DK5_27_LCO_57	Culicoides obsoletus	592	Dyssevej	Denmark	55.2	12.11	2015	MT171125	/	/
Seq1103	DK5_28_LCO_58	Culicoides obsoletus	536	Dyssevej	Denmark	55.2	12.11	2015	MT171126	/	/
Seq1104	DK5_29_LCO_59	Culicoides obsoletus	620	Dyssevej	Denmark	55.2	12.11	2015	MT171127	/	/
Seq1105	DK5_30_LCO_60	Culicoides obsoletus	622	Dyssevej	Denmark	55.2	12.11	2015	MT171128	/	/
Seq1106	DK6_03_LCO_35	Culicoides obsoletus	613	Leestrupvej	Denmark	55.22	12.05	2015	MT171129	/	/
Seq1107	DK6_04_LCO_36	Culicoides scoticus	615	Leestrupvej	Denmark	55.22	12.05	2015	MT171130	/	/
Seq1108	DK6_05_LCO_37	Culicoides scoticus	622	Leestrupvej	Denmark	55.22	12.05	2015	MT171131	/	/
Seq1109	DK6_06_LCO_38	Culicoides obsoletus	613	Leestrupvej	Denmark	55.22	12.05	2015	MT171132	/	/
Seq1110	DK6_07_LCO_39	Culicoides scoticus	600	Leestrupvej	Denmark	55.22	12.05	2015	MT171133	/	/
Seq1111	DK6_08_LCO_40	Culicoides obsoletus	569	Leestrupvej	Denmark	55.22	12.05	2015	MT171134	/	/
Seq1112	DK6_09_LCO_41	Culicoides scoticus	581	Leestrupvej	Denmark	55.22	12.05	2015	MT171135	/	/
Seq1113	DK6_10_LCO_42	Culicoides obsoletus	557	Leestrupvej	Denmark	55.22	12.05	2015	MT171136	/	/
Seq1114	DK6_11_LCO_43	Culicoides scoticus	620	Leestrupvej	Denmark	55.22	12.05	2015	MT171137	/	/
Seq1115	DK6_12_LCO_44	Culicoides scoticus	622	Leestrupvej	Denmark	55.22	12.05	2015	MT171138	/	/
Seq1116	DK6_13_LCO_45	Culicoides scoticus	622	Leestrupvej	Denmark	55.22	12.05	2015	MT171139	/	/
Seq1117	DK6_14_LCO_46	Culicoides scoticus	613	Leestrupvej	Denmark	55.22	12.05	2015	MT171140	/	/
Seq1118	DK6_16_LCO_48	Culicoides obsoletus	613	Leestrupvej	Denmark	55.22	12.05	2015	MT171141	MT163114	MT175650
Seq1119	DK6_17_LCO_49	Culicoides scoticus	569	Leestrupvej	Denmark	55.22	12.05	2015	MT171142	/	/
Seq1120	DK6_18_LCO_50	Culicoides scoticus	626	Leestrupvej	Denmark	55.22	12.05	2015	MT171143	/	/
Seq1121	DK6_19_LCO_51	Culicoides scoticus	612	Leestrupvej	Denmark	55.22	12.05	2015	MT171144	/	/
Seq1122	DK6_20_LCO_52	Culicoides scoticus	624	Leestrupvej	Denmark	55.22	12.05	2015	MT171145	/	/
Seq1123	DK6_21_LCO_53	Culicoides scoticus	613	Leestrupvej	Denmark	55.22	12.05	2015	MT171146	/	/
Seq1124	DK6_22_LCO_54	Culicoides obsoletus	619	Leestrupvej	Denmark	55.22	12.05	2015	MT171147	/	/
Seq1125	DK6_23_LCO_55	Culicoides scoticus	613	Leestrupvej	Denmark	55.22	12.05	2015	MT171148	/	/
Seq1126	DK6_24_LCO_56	Culicoides scoticus	623	Leestrupvej	Denmark	55.22	12.05	2015	MT171149	MT163115	MT175651
Seq1127	DK6_25_LCO_57	Culicoides scoticus	619	Leestrupvej	Denmark	55.22	12.05	2015	MT171150	/	/
Seq1128	DK6_26_LCO_58	Culicoides obsoletus clade O2	614	Leestrupvej	Denmark	55.22	12.05	2015	MT171151	/	/
Seq1129	DK6_27_LCO_59	Culicoides obsoletus	615	Leestrupvej	Denmark	55.22	12.05	2015	MT171152	/	/
Seq1130	DK6_28_LCO_60	Culicoides obsoletus	616	Leestrupvej	Denmark	55.22	12.05	2015	MT171153	/	/
Seq1131	DK6_29_LCO_61	Culicoides scoticus	573	Leestrupvej	Denmark	55.22	12.05	2015	MT171154	/	/
Seq1132	DK6_30_LCO_62	Culicoides scoticus	614	Leestrupvej	Denmark	55.22	12.05	2015	MT171155	/	/
Seq1133	DK6_31_LCO_63	Culicoides scoticus	602	Leestrupvej	Denmark	55.22	12.05	2015	MT171156	/	/
Seq1134	DK6_32_LCO_64	Culicoides scoticus	614	Leestrupvej	Denmark	55.22	12.05	2015	MT171157	/	/
Seq1135	ES_2E_01_LCO_42	Culicoides obsoletus	613	Torre del Campo	Spain	37.8346	-3.90381	2017	MT171158	/	/
Seq1136	ES_2E_02_LCO_43	Culicoides obsoletus	613	Torre del Campo	Spain	37.8346	-3.90381	2017	MT171159	/	/
Seq1137	ES_2E_03_LCO_44	Culicoides obsoletus	613	Torre del Campo	Spain	37.8346	-3.90381	2017	MT171160	/	/
Seq1138	ES_2E_04_LCO_45	Culicoides obsoletus	613	Torre del Campo	Spain	37.8346	-3.90381	2017	MT171161	/	/
Seq1139	ES_2E_05_LCO_46	Culicoides obsoletus	613	Torre del Campo	Spain	37.8346	-3.90381	2017	MT171162	/	/
Seq1140	ES_2E_06_LCO_47	Culicoides obsoletus	613	Torre del Campo	Spain	37.8346	-3.90381	2017	MT171163	/	/
Seq1141	ES_2E_07_LCO_48	Culicoides obsoletus	613	Torre del Campo	Spain	37.8346	-3.90381	2017	MT171164	/	/
Seq1142	ES_2E_08_LCO_49	Culicoides obsoletus	613	Torre del Campo	Spain	37.8346	-3.90381	2017	MT171165	/	/
Seq1143	ES_2F_01_LCO_50	Culicoides obsoletus	613	Torre del Campo	Spain	37.8346	-3.90381	2017	MT171166	/	/
Seq1144	ES_2F_02_LCO_51	Culicoides obsoletus	613	Torre del Campo	Spain	37.8346	-3.90381	2017	MT171167	/	/
Seq1145	ES_2F_03_LCO_52	Culicoides obsoletus	613	Torre del Campo	Spain	37.8346	-3.90381	2017	MT171168	/	/
Seq1146	ES_2F_04_LCO_53	Culicoides obsoletus	592	Torre del Campo	Spain	37.8346	-3.90381	2017	MT171169	/	/
Seq1147	ES_2F_05_LCO_54	Culicoides obsoletus	613	Torre del Campo	Spain	37.8346	-3.90381	2017	MT171170	/	/
Seq1148	ES_3D_01_LCO_20	Culicoides obsoletus	613	Orgiva	Spain	36.85	-2.99	2017	MT171171	/	/
Seq1149	ES_3D_03_LCO_22	Culicoides obsoletus	606	Orgiva	Spain	36.85	-2.99	2017	MT171172	/	/
Seq1150	ES_3D_10_LCO_29	Culicoides obsoletus	613	Orgiva	Spain	36.85	-2.99	2017	MT171173	/	/
Seq1151	ES_3D_11_LCO_30	Culicoides scoticus	613	Orgiva	Spain	36.85	-2.99	2017	MT171174	/	/
Seq1152	ES_3D_13_LCO_32	Culicoides scoticus	613	Orgiva	Spain	36.85	-2.99	2017	MT171175	/	/
Seq1153	ES_3D_14_LCO_33	Culicoides obsoletus	613	Orgiva	Spain	36.85	-2.99	2017	MT171176	/	/
Seq1154	ES_3D_15_LCO_34	Culicoides obsoletus	613	Orgiva	Spain	36.85	-2.99	2017	MT171177	/	/
Seq1155	ES_3D_18_LCO_37	Culicoides scoticus	597	Orgiva	Spain	36.85	-2.99	2017	MT171178	/	/
Seq1156	ES_3D_19_LCO_38	Culicoides scoticus	591	Orgiva	Spain	36.85	-2.99	2017	MT171179	/	/
Seq1157	ES_3D_22_LCO_41	Culicoides obsoletus	607	Orgiva	Spain	36.85	-2.99	2017	MT171180	/	/
Seq1158	ES_4A_01_LCO_1	Culicoides obsoletus	613	Castril	Spain	37.73	-2.34	2017	MT171181	/	/
Seq1159	ES_4A_02_LCO_2	Culicoides scoticus	613	Castril	Spain	37.73	-2.34	2017	MT171182	/	/
Seq1160	ES_4A_03_LCO_3	Culicoides obsoletus	613	Castril	Spain	37.73	-2.34	2017	MT171183	/	/
Seq1161	ES_4A_04_LCO_4	Culicoides obsoletus	613	Castril	Spain	37.73	-2.34	2017	MT171184	/	/
Seq1162	ES_4B_01_LCO_5	Culicoides obsoletus	613	Castril	Spain	37.73	-2.34	2017	MT171185	/	/
Seq1163	ES_4B_02_LCO_6	Culicoides obsoletus	613	Castril	Spain	37.73	-2.34	2017	MT171186	/	/
Seq1164	ES_4B_03_LCO_7	Culicoides obsoletus	613	Castril	Spain	37.73	-2.34	2017	MT171187	/	/
Seq1165	ES_4B_04_LCO_8	Culicoides obsoletus	613	Castril	Spain	37.73	-2.34	2017	MT171188	/	/
Seq1166	ES_4B_05_LCO_9	Culicoides obsoletus	613	Castril	Spain	37.73	-2.34	2017	MT171189	/	/
Seq1167	ES_4B_06_LCO_10	Culicoides obsoletus	598	Castril	Spain	37.73	-2.34	2017	MT171190	/	/
Seq1168	ES_4B_07_LCO_11	Culicoides obsoletus	609	Castril	Spain	37.73	-2.34	2017	MT171191	/	/
Seq1169	ES_4C_01_LCO_12	Culicoides obsoletus	612	Castril	Spain	37.73	-2.34	2017	MT171192	/	/
Seq1170	ES_4C_03_LCO_14	Culicoides obsoletus	613	Castril	Spain	37.73	-2.34	2017	MT171193	/	/
Seq1171	ES_4C_04_LCO_15	Culicoides obsoletus	611	Castril	Spain	37.73	-2.34	2017	MT171194	/	/
Seq1172	ES_4C_05_LCO_16	Culicoides obsoletus	613	Castril	Spain	37.73	-2.34	2017	MT171195	/	/
Seq1173	ES_4C_06_LCO_17	Culicoides obsoletus	612	Castril	Spain	37.73	-2.34	2017	MT171196	/	/
Seq1174	ES_4C_07_LCO_18	Culicoides obsoletus	613	Castril	Spain	37.73	-2.34	2017	MT171197	/	/
Seq1175	ES_A1_01_LCO_49	Culicoides scoticus	613	Arauut	Spain	41.9652	1.7608	2017	MT171198	/	/
Seq1176	ES_A1_01_LCO_49_2	Culicoides scoticus	613	Arauut	Spain	41.9652	1.7608	2017	MT171199	/	/
Seq1177	ES_A1_02_LCO_50	Culicoides obsoletus	613	Arauut	Spain	41.9652	1.7608	2017	MT171200	/	/
Seq1178	ES_A1_03_LCO_51	Culicoides scoticus	613	Arauut	Spain	41.9652	1.7608	2017	MT171201	/	/
Seq1179	ES_A1_06_LCO_54	Culicoides obsoletus	613	Arauut	Spain	41.9652	1.7608	2017	MT171202	/	/
Seq1180	ES_A1_07_LCO_55	Culicoides obsoletus	613	Arauut	Spain	41.9652	1.7608	2017	MT171203	/	/
Seq1181	ES_A1_08_LCO_56	Culicoides obsoletus	613	Arauut	Spain	41.9652	1.7608	2017	MT171204	/	/
Seq1182	ES_A1_09_LCO_57	Culicoides obsoletus	613	Arauut	Spain	41.9652	1.7608	2017	MT171205	/	/
Seq1183	ES_A1_10_LCO_58	Culicoides scoticus	552	Arauut	Spain	41.9652	1.7608	2017	MT171206	/	/
Seq1184	ES_A1_11_LCO_59	Culicoides obsoletus	613	Arauut	Spain	41.9652	1.7608	2017	MT171207	/	/
Seq1185	ES_A1_12_LCO_60	Culicoides obsoletus	608	Arauut	Spain	41.9652	1.7608	2017	MT171208	/	/
Seq1186	ES_A1_13_LCO_61	Culicoides obsoletus	593	Arauut	Spain	41.9652	1.7608	2017	MT171209	/	/
Seq1187	ES_A1_14_LCO_62	Culicoides obsoletus	613	Arauut	Spain	41.9652	1.7608	2017	MT171210	/	/
Seq1188	ES_A1_16_LCO_64	Culicoides scoticus	590	Arauut	Spain	41.9652	1.7608	2017	MT171211	/	/
Seq1189	ES_A1_17_LCO_65	Culicoides obsoletus	613	Arauut	Spain	41.9652	1.7608	2017	MT171212	/	/
Seq1190	ES_A1_18_LCO_66	Culicoides obsoletus	613	Arauut	Spain	41.9652	1.7608	2017	MT171213	/	/
Seq1191	ES_A1_19_LCO_67	Culicoides obsoletus	613	Arauut	Spain	41.9652	1.7608	2017	MT171214	/	/
Seq1192	ES_A1_20_LCO_68	Culicoides obsoletus	613	Arauut	Spain	41.9652	1.7608	2017	MT171215	/	/
Seq1193	ES_A1_21_LCO_69	Culicoides scoticus	599	Arauut	Spain	41.9652	1.7608	2017	MT171216	/	/
Seq1194	ES_A1_22_LCO_70	Culicoides obsoletus	613	Arauut	Spain	41.9652	1.7608	2017	MT171217	MT163116	MT175652
Seq1195	ES_A1_23_LCO_71	Culicoides obsoletus	613	Arauut	Spain	41.9652	1.7608	2017	MT171218	/	/
Seq1196	ES_A2_01_LCO_73	Culicoides obsoletus	614	Arauut	Spain	41.9652	1.7608	2017	MT171219	/	/
Seq1197	ES_A2_02_LCO_74	Culicoides obsoletus	613	Arauut	Spain	41.9652	1.7608	2017	MT171220	/	/
Seq1198	ES_A2_03_LCO_75	Culicoides obsoletus	613	Arauut	Spain	41.9652	1.7608	2017	MT171221	/	/
Seq1199	ES_A2_04_LCO_76	Culicoides obsoletus	613	Arauut	Spain	41.9652	1.7608	2017	MT171222	/	/
Seq1200	ES_A2_05_LCO_77	Culicoides scoticus clade 2	613	Arauut	Spain	41.9652	1.7608	2017	MT171223	/	/
Seq1201	ES_A2_06_LCO_78	Culicoides obsoletus	613	Arauut	Spain	41.9652	1.7608	2017	MT171224	/	/
Seq1202	ES_A2_08_LCO_80	Culicoides obsoletus	612	Arauut	Spain	41.9652	1.7608	2017	MT171225	/	/
Seq1203	ES_A2_09_LCO_81	Culicoides obsoletus	592	Arauut	Spain	41.9652	1.7608	2017	MT171226	/	/
Seq1204	ES_A2_10_LCO_82	Culicoides obsoletus	613	Arauut	Spain	41.9652	1.7608	2017	MT171227	/	/
Seq1205	ES_A2_11_LCO_83	Culicoides obsoletus	613	Arauut	Spain	41.9652	1.7608	2017	MT171228	/	/
Seq1206	ES_A2_13_LCO_85	Culicoides obsoletus	613	Arauut	Spain	41.9652	1.7608	2017	MT171229	/	/
Seq1207	ES_A2_14_LCO_86	Culicoides obsoletus	614	Arauut	Spain	41.9652	1.7608	2017	MT171230	/	/
Seq1208	ES_A2_15_LCO_87	Culicoides obsoletus	615	Arauut	Spain	41.9652	1.7608	2017	MT171231	/	/
Seq1209	ES_A2_19_LCO_91	Culicoides obsoletus	550	Arauut	Spain	41.9652	1.7608	2017	MT171232	/	/
Seq1210	ES_A2_21_LCO_93	Culicoides obsoletus	613	Arauut	Spain	41.9652	1.7608	2017	MT171233	/	/
Seq1211	ES_A2_22_LCO_94	Culicoides obsoletus	613	Arauut	Spain	41.9652	1.7608	2017	MT171234	/	/
Seq1212	ES_CAN1_01_LCO_55	Culicoides obsoletus	613	Arucas	Spain	28.13	-15.5	2010	MT171235	/	/
Seq1213	ES_CAN1_01_LCO_55_2	Culicoides obsoletus	613	Arucas	Spain	28.13	-15.5	2010	MT171236	/	/
Seq1214	ES_CAN1_02_LCO_56	Culicoides obsoletus	613	Arucas	Spain	28.13	-15.5	2010	MT171237	/	/
Seq1215	ES_CAN2_02_LCO_58	Culicoides obsoletus	613	Arucas	Spain	28.13	-15.5	2010	MT171238	/	/
Seq1216	ES_CAN2_03_LCO_59	Culicoides obsoletus	613	Arucas	Spain	28.13	-15.5	2010	MT171239	/	/
Seq1217	ES_CAN2_04_LCO_60	Culicoides obsoletus	610	Arucas	Spain	28.13	-15.5	2010	MT171240	/	/
Seq1218	ES_CAN2_05_LCO_61	Culicoides obsoletus	614	Arucas	Spain	28.13	-15.5	2010	MT171241	/	/
Seq1219	ES_CAN2_06_LCO_62	Culicoides montanus	613	Arucas	Spain	28.13	-15.5	2010	MT171242	/	/
Seq1220	ES_CAN3_01_LCO_63	Culicoides obsoletus	552	Arucas	Spain	28.13	-15.5	2010	MT171243	/	/
Seq1221	ES_CAN3_02_LCO_64	Culicoides obsoletus	613	Arucas	Spain	28.13	-15.5	2010	MT171244	/	/
Seq1222	ES_CAN3_03_LCO_65	Culicoides obsoletus	613	Arucas	Spain	28.13	-15.5	2010	MT171245	/	/
Seq1223	ES_CAN3_04_LCO_66	Culicoides obsoletus	611	Arucas	Spain	28.13	-15.5	2010	MT171246	/	/
Seq1224	ES_CAN3_05_LCO_67	Culicoides obsoletus	613	Arucas	Spain	28.13	-15.5	2010	MT171247	/	/
Seq1225	ES_CAN3_06_LCO_68	Culicoides obsoletus	613	Arucas	Spain	28.13	-15.5	2010	MT171248	/	/
Seq1226	ES_CAN3_07_LCO_69	Culicoides obsoletus	613	Arucas	Spain	28.13	-15.5	2010	MT171249	/	/
Seq1227	ES_CAN3_08_LCO_70	Culicoides obsoletus	613	Arucas	Spain	28.13	-15.5	2010	MT171250	/	/
Seq1228	ES_CAN4_01_LCO_71	Culicoides obsoletus	613	Arucas	Spain	28.13	-15.5	2010	MT171251	/	/
Seq1229	ES_CAN5_01_LCO_72	Culicoides obsoletus	613	Arucas	Spain	28.13	-15.5	2010	MT171252	/	/
Seq1230	ES_CAN5_02_LCO_73	Culicoides obsoletus	613	Arucas	Spain	28.13	-15.5	2010	MT171253	/	/
Seq1231	ES_CAN5_03_LCO_74	Culicoides obsoletus	613	Arucas	Spain	28.13	-15.5	2010	MT171254	/	/
Seq1232	ES_CAN5_04_LCO_75	Culicoides obsoletus	613	Arucas	Spain	28.13	-15.5	2010	MT171255	/	/
Seq1233	ES_CAN5_05_LCO_76	Culicoides obsoletus	613	Arucas	Spain	28.13	-15.5	2010	MT171256	/	/
Seq1234	ES_CAN5_06_LCO_77	Culicoides obsoletus	613	Arucas	Spain	28.13	-15.5	2010	MT171257	/	/
Seq1235	ES_CAN5_07_LCO_78	Culicoides obsoletus	611	Arucas	Spain	28.13	-15.5	2010	MT171258	/	/
Seq1236	ES_CAN5_08_LCO_79	Culicoides obsoletus	613	Arucas	Spain	28.13	-15.5	2010	MT171259	/	/
Seq1237	ES_CAN5_10_LCO_81	Culicoides obsoletus	613	Arucas	Spain	28.13	-15.5	2010	MT171260	/	/
Seq1238	ES_CAN5_11_LCO_82	Culicoides obsoletus	613	Arucas	Spain	28.13	-15.5	2010	MT171261	/	/
Seq1239	ES_CAN6_01_LCO_83	Culicoides obsoletus	612	Arucas	Spain	28.13	-15.5	2010	MT171262	/	/
Seq1240	ES_CAN6_02_LCO_84	Culicoides obsoletus	608	Arucas	Spain	28.13	-15.5	2010	MT171263	/	/
Seq1241	ES_CAN6_03_LCO_85	Culicoides obsoletus	613	Arucas	Spain	28.13	-15.5	2010	MT171264	/	/
Seq1242	ES_CAN6_04_LCO_86	Culicoides obsoletus	613	Arucas	Spain	28.13	-15.5	2010	MT171265	/	/
Seq1243	ES_CAN6_05_LCO_87	Culicoides obsoletus	612	Arucas	Spain	28.13	-15.5	2010	MT171266	/	/
Seq1244	ES_CAN6_06_LCO_88	Culicoides obsoletus	613	Arucas	Spain	28.13	-15.5	2010	MT171267	/	/
Seq1245	ES_CAN6_08_LCO_90	Culicoides obsoletus	613	Arucas	Spain	28.13	-15.5	2010	MT171268	/	/
Seq1246	ES_CAN6_09_LCO_91	Culicoides obsoletus	613	Arucas	Spain	28.13	-15.5	2010	MT171269	/	/
Seq1247	ES_CAN6_10_LCO_92	Culicoides obsoletus	613	Arucas	Spain	28.13	-15.5	2010	MT171270	/	/
Seq1248	ES_CAN6_11_LCO_93	Culicoides obsoletus	610	Arucas	Spain	28.13	-15.5	2010	MT171271	/	/
Seq1249	ES_CAN6_12_LCO_94	Culicoides obsoletus	612	Arucas	Spain	28.13	-15.5	2010	MT171272	/	/
Seq1250	ES_IUB03_LCO1490_67	Culicoides obsoletus	612	Palma	Spain	39.56	2.65	2015	MT171273	/	/
Seq1251	ES_IUB04_LCO1490_68	Culicoides obsoletus	612	Palma	Spain	39.56	2.65	2015	MT171274	/	/
Seq1252	ES_IUB05_LCO1490_69	Culicoides obsoletus	612	Palma	Spain	39.56	2.65	2015	MT171275	/	/
Seq1253	ES_IUB06_LCO1490_70	Culicoides obsoletus	612	Palma	Spain	39.56	2.65	2015	MT171276	/	/
Seq1254	ES_IUB07_LCO1490_71	Culicoides obsoletus	612	Palma	Spain	39.56	2.65	2015	MT171277	/	/
Seq1255	ES_IUB08_LCO1490_72	Culicoides obsoletus	612	Palma	Spain	39.56	2.65	2015	MT171278	/	/
Seq1256	ES_IUB09_LCO_LCO1490_2	Culicoides obsoletus	546	Palma	Spain	39.56	2.65	2015	MT171279	/	/
Seq1257	ES_IUB12_LCO1490_76	Culicoides obsoletus	612	Palma	Spain	39.56	2.65	2015	MT171280	/	/
Seq1258	ES_IUB13_LCO1490_77	Culicoides obsoletus	612	Palma	Spain	39.56	2.65	2015	MT171281	/	/
Seq1259	ES_IUB14_LCO1490_78	Culicoides montanus	612	Palma	Spain	39.56	2.65	2015	MT171282	/	/
Seq1260	ES_IUB15_LCO1490_79	Culicoides obsoletus	612	Palma	Spain	39.56	2.65	2015	MT171283	/	/
Seq1261	ES_IUB16_LCO1490_80	Culicoides obsoletus	612	Palma	Spain	39.56	2.65	2015	MT171284	/	/
Seq1262	ES_IUB17_LCO1490_81	Culicoides obsoletus	612	Palma	Spain	39.56	2.65	2015	MT171285	/	/
Seq1263	ES_IUB18_LCO1490_82	Culicoides obsoletus	612	Palma	Spain	39.56	2.65	2015	MT171286	/	/
Seq1264	ES_IUB19_LCO1490_83	Culicoides obsoletus	612	Palma	Spain	39.56	2.65	2015	MT171287	/	/
Seq1265	ES_IUB20_LCO1490_84	Culicoides obsoletus	612	Palma	Spain	39.56	2.65	2015	MT171288	/	/
Seq1266	ES_IUB21_LCO1490_85	Culicoides obsoletus	612	Palma	Spain	39.56	2.65	2015	MT171289	/	/
Seq1267	ES_IUB22_LCO1490_86	Culicoides obsoletus	612	Palma	Spain	39.56	2.65	2015	MT171290	/	/
Seq1268	ES_IUB23_LCO1490_87	Culicoides obsoletus	612	Palma	Spain	39.56	2.65	2015	MT171291	/	/
Seq1269	ES_IUB24_LCO1490_88	Culicoides obsoletus	612	Palma	Spain	39.56	2.65	2015	MT171292	/	/
Seq1270	ES_IUB25_LCO_LCO1490_4	Culicoides obsoletus	565	Palma	Spain	39.56	2.65	2015	MT171293	/	/
Seq1271	ES_IUB27_LCO1490_91	Culicoides obsoletus	612	Palma	Spain	39.56	2.65	2015	MT171294	/	/
Seq1272	ES_IUB28_LCO1490_92	Culicoides obsoletus	612	Palma	Spain	39.56	2.65	2015	MT171295	/	/
Seq1273	ES_IUB29_LCO1490_93	Culicoides obsoletus	612	Palma	Spain	39.56	2.65	2015	MT171296	/	/
Seq1274	ES_IUB30_LCO1490_94	Culicoides obsoletus	612	Palma	Spain	39.56	2.65	2015	MT171297	/	/
Seq1275	ES_IUB31_LCO1490_95	Culicoides obsoletus	612	Palma	Spain	39.56	2.65	2015	MT171298	/	/
Seq1276	ES_IUB32_LCO1490_96	Culicoides obsoletus	612	Palma	Spain	39.56	2.65	2015	MT171299	/	/
Seq1277	ES_M_01_LCO_1	Culicoides scoticus	573	Massanes	Spain	41.7655	2.67	2017	MT171300	/	/
Seq1278	ES_M_02_LCO_2	Culicoides scoticus clade 2	569	Massanes	Spain	41.7655	2.67	2017	MT171301	MT163117	MT175653
Seq1279	ES_M_03_LCO_3	Culicoides scoticus clade 2	551	Massanes	Spain	41.7655	2.67	2017	MT171302	MT163118	MT175654
Seq1280	ES_M_07_LCO_7	Culicoides scoticus	550	Massanes	Spain	41.7655	2.67	2017	MT171303	/	/
Seq1281	ES_M_08_LCO_8	Culicoides scoticus clade 2	613	Massanes	Spain	41.7655	2.67	2017	MT171304	/	/
Seq1282	ES_M_09_LCO_9	Culicoides scoticus clade 2	613	Massanes	Spain	41.7655	2.67	2017	MT171305	/	/
Seq1283	ES_M_10_LCO_10	Culicoides scoticus clade 2	581	Massanes	Spain	41.7655	2.67	2017	MT171306	/	/
Seq1284	ES_M_11_LCO_11	Culicoides scoticus clade 2	598	Massanes	Spain	41.7655	2.67	2017	MT171307	MT163119	MT175655
Seq1285	ES_M_13_LCO_13	Culicoides scoticus clade 2	613	Massanes	Spain	41.7655	2.67	2017	MT171308	/	/
Seq1286	ES_M_15_LCO_15	Culicoides scoticus clade 2	613	Massanes	Spain	41.7655	2.67	2017	MT171309	/	/
Seq1287	ES_M_16_LCO_16	Culicoides scoticus	581	Massanes	Spain	41.7655	2.67	2017	MT171310	MT163120	MT175656
Seq1288	ES_M_17_LCO_17	Culicoides scoticus clade 2	613	Massanes	Spain	41.7655	2.67	2017	MT171311	/	/
Seq1289	ES_M_18_LCO_18	Culicoides scoticus	569	Massanes	Spain	41.7655	2.67	2017	MT171312	/	/
Seq1290	ES_M_19_LCO_19	Culicoides scoticus clade 2	605	Massanes	Spain	41.7655	2.67	2017	MT171313	/	/
Seq1291	ES_M_21_LCO_21	Culicoides scoticus clade 2	613	Massanes	Spain	41.7655	2.67	2017	MT171314	/	/
Seq1292	ES_M_22_LCO_22	Culicoides scoticus	581	Massanes	Spain	41.7655	2.67	2017	MT171315	/	/
Seq1293	ES_M_23_LCO_23	Culicoides scoticus	573	Massanes	Spain	41.7655	2.67	2017	MT171316	/	/
Seq1294	ES_M_24_LCO_24	Culicoides scoticus	573	Massanes	Spain	41.7655	2.67	2017	MT171317	/	/
Seq1295	ES_M_25_LCO_25	Culicoides scoticus clade 2	613	Massanes	Spain	41.7655	2.67	2017	MT171318	/	/
Seq1296	ES_M_26_LCO_26	Culicoides scoticus clade 2	611	Massanes	Spain	41.7655	2.67	2017	MT171319	/	/
Seq1297	ES_M_27_LCO_27	Culicoides scoticus clade 2	613	Massanes	Spain	41.7655	2.67	2017	MT171320	/	/
Seq1298	ES_M_28_LCO_28	Culicoides scoticus clade 2	585	Massanes	Spain	41.7655	2.67	2017	MT171321	/	/
Seq1299	ES_M_29_LCO_29	Culicoides scoticus	576	Massanes	Spain	41.7655	2.67	2017	MT171322	/	/
Seq1300	ES_M_30_LCO_30	Culicoides scoticus	595	Massanes	Spain	41.7655	2.67	2017	MT171323	/	/
Seq1301	ES_M_31_LCO_31	Culicoides scoticus clade 2	572	Massanes	Spain	41.7655	2.67	2017	MT171324	MT163121	MT175657
Seq1302	ES_M_32_LCO_32	Culicoides scoticus	572	Massanes	Spain	41.7655	2.67	2017	MT171325	/	/
Seq1303	ES_M_34_LCO_34	Culicoides scoticus clade 2	573	Massanes	Spain	41.7655	2.67	2017	MT171326	MT163122	MT175658
Seq1304	ES_M_36_LCO_36	Culicoides scoticus clade 2	581	Massanes	Spain	41.7655	2.67	2017	MT171327	/	/
Seq1305	ES_M_37_LCO_37	Culicoides scoticus	549	Massanes	Spain	41.7655	2.67	2017	MT171328	/	/
Seq1306	ES_M_38_LCO_38	Culicoides scoticus clade 2	552	Massanes	Spain	41.7655	2.67	2017	MT171329	MT163123	MT175659
Seq1307	ES_M_39_LCO_39	Culicoides scoticus	573	Massanes	Spain	41.7655	2.67	2017	MT171330	/	/
Seq1308	ES_M_40_LCO_40	Culicoides scoticus	551	Massanes	Spain	41.7655	2.67	2017	MT171331	/	/
Seq1309	ES_M_41_LCO_41	Culicoides scoticus clade 2	613	Massanes	Spain	41.7655	2.67	2017	MT171332	/	/
Seq1310	ES_M_45_LCO_45	Culicoides scoticus	594	Massanes	Spain	41.7655	2.67	2017	MT171333	/	/
Seq1311	ES_M_46_LCO_46	Culicoides scoticus	574	Massanes	Spain	41.7655	2.67	2017	MT171334	/	/
Seq1312	ES_M_47_LCO_47	Culicoides scoticus	550	Massanes	Spain	41.7655	2.67	2017	MT171335	/	/
Seq1313	ES_M_48_LCO_48	Culicoides scoticus	573	Massanes	Spain	41.7655	2.67	2017	MT171336	/	/
Seq1314	FI01_02_LCO_2	Culicoides obsoletus clade O2	562	Sotkamo	Finland	64.04	28.72	2015	MT171337	MT163124	MT175660
Seq1315	FI01_08_LCO_3	Culicoides obsoletus clade O2	562	Sotkamo	Finland	64.04	28.72	2015	MT171338	/	/
Seq1316	FI01_10_LCO_4	Culicoides obsoletus clade dark	562	Sotkamo	Finland	64.04	28.72	2015	MT171339	MT163125	MT175661
Seq1317	FI01_11_LCO_5	Culicoides obsoletus clade dark	562	Sotkamo	Finland	64.04	28.72	2015	MT171340	MT163126	MT175662
Seq1318	FI01_12_LCO_6	Culicoides obsoletus clade O2	562	Sotkamo	Finland	64.04	28.72	2015	MT171341	MT163127	MT175663
Seq1319	FI01_18_LCO_7	Culicoides scoticus	562	Sotkamo	Finland	64.04	28.72	2015	MT171342	/	/
Seq1320	FI01_22_LCO_8	Culicoides obsoletus clade O2	562	Sotkamo	Finland	64.04	28.72	2015	MT171343	/	/
Seq1321	FI01_23_LCO_9	Culicoides obsoletus clade dark	562	Sotkamo	Finland	64.04	28.72	2015	MT171344	MT163128	MT175664
Seq1322	FI01_26_31_LCO_10	Culicoides obsoletus clade O2	562	Sotkamo	Finland	64.04	28.72	2015	MT171345	/	/
Seq1323	FI01_26_LCO_12	Culicoides obsoletus clade O2	562	Sotkamo	Finland	64.04	28.72	2015	MT171346	/	/
Seq1324	FI01_32_LCO_11	Culicoides obsoletus clade O2	562	Sotkamo	Finland	64.04	28.72	2015	MT171347	/	/
Seq1325	FI01_33_LCO1490_1	Culicoides scoticus	571	Sotkamo	Finland	64.04	28.72	2015	MT171348	/	/
Seq1326	FI01_34_LCO1490_2	Culicoides obsoletus	571	Sotkamo	Finland	64.04	28.72	2015	MT171349	/	/
Seq1327	FI01_35_LCO1490_3	Culicoides scoticus	571	Sotkamo	Finland	64.04	28.72	2015	MT171350	/	/
Seq1328	FI01_37_LCO1490_5	Culicoides scoticus	571	Sotkamo	Finland	64.04	28.72	2015	MT171351	/	/
Seq1329	FI01_38_LCO1490_6	Culicoides obsoletus	571	Sotkamo	Finland	64.04	28.72	2015	MT171352	/	/
Seq1330	FI01_39_LCO1490_7	Culicoides obsoletus	571	Sotkamo	Finland	64.04	28.72	2015	MT171353	/	/
Seq1331	FI01_40_LCO1490_8	Culicoides scoticus	571	Sotkamo	Finland	64.04	28.72	2015	MT171354	/	/
Seq1332	FI01_41_LCO1490_9	Culicoides scoticus	571	Sotkamo	Finland	64.04	28.72	2015	MT171355	/	/
Seq1333	FI01_42_LCO1490_10	Culicoides obsoletus	571	Sotkamo	Finland	64.04	28.72	2015	MT171356	/	/
Seq1334	FI01_43_LCO1490_11	Culicoides obsoletus	571	Sotkamo	Finland	64.04	28.72	2015	MT171357	/	/
Seq1335	FI01_44_LCO1490_12	Culicoides obsoletus	571	Sotkamo	Finland	64.04	28.72	2015	MT171358	/	/
Seq1336	FI01_45_LCO1490_13	Culicoides scoticus	571	Sotkamo	Finland	64.04	28.72	2015	MT171359	/	/
Seq1337	FI01_46_LCO1490_14	Culicoides obsoletus	571	Sotkamo	Finland	64.04	28.72	2015	MT171360	/	/
Seq1338	FI01_47_LCO1490_15	Culicoides scoticus	571	Sotkamo	Finland	64.04	28.72	2015	MT171361	/	/
Seq1339	FI01_48_LCO1490_16	Culicoides obsoletus clade dark	571	Sotkamo	Finland	64.04	28.72	2015	MT171362	MT163129	MT175665
Seq1340	FI01_49_LCO1490_17	Culicoides obsoletus	571	Sotkamo	Finland	64.04	28.72	2015	MT171363	/	/
Seq1341	FI01_50_LCO1490_18	Culicoides obsoletus	571	Sotkamo	Finland	64.04	28.72	2015	MT171364	/	/
Seq1342	FI01_51_LCO1490_19	Culicoides obsoletus	571	Sotkamo	Finland	64.04	28.72	2015	MT171365	/	/
Seq1343	FI01_52_LCO1490_20	Culicoides obsoletus	571	Sotkamo	Finland	64.04	28.72	2015	MT171366	/	/
Seq1344	FI01_53_LCO1490_21	Culicoides obsoletus	571	Sotkamo	Finland	64.04	28.72	2015	MT171367	/	/
Seq1345	FI01_54_LCO1490_22	Culicoides obsoletus	571	Sotkamo	Finland	64.04	28.72	2015	MT171368	/	/
Seq1346	FI01_55_LCO1490_23	Culicoides obsoletus	571	Sotkamo	Finland	64.04	28.72	2015	MT171369	/	/
Seq1347	FI01_56_LCO1490_24	Culicoides obsoletus	571	Sotkamo	Finland	64.04	28.72	2015	MT171370	/	/
Seq1348	FI01_57_LCO1490_25	Culicoides scoticus	571	Sotkamo	Finland	64.04	28.72	2015	MT171371	/	/
Seq1349	FI01_58_LCO1490_26	Culicoides scoticus	571	Sotkamo	Finland	64.04	28.72	2015	MT171372	/	/
Seq1350	FI01_59_LCO1490_27	Culicoides obsoletus	571	Sotkamo	Finland	64.04	28.72	2015	MT171373	/	/
Seq1351	FI01_60_LCO1490_28	Culicoides obsoletus	571	Sotkamo	Finland	64.04	28.72	2015	MT171374	/	/
Seq1352	FI01_61_LCO1490_29	Culicoides obsoletus	571	Sotkamo	Finland	64.04	28.72	2015	MT171375	/	/
Seq1353	FI01_65_LCO1490_33	Culicoides scoticus	571	Sotkamo	Finland	64.04	28.72	2015	MT171376	/	/
Seq1354	FI01_66_LCO1490_34	Culicoides scoticus	571	Sotkamo	Finland	64.04	28.72	2015	MT171377	/	/
Seq1355	FI01_67_LCO1490_35	Culicoides scoticus	571	Sotkamo	Finland	64.04	28.72	2015	MT171378	/	/
Seq1356	FI01_68_LCO1490_36	Culicoides scoticus	571	Sotkamo	Finland	64.04	28.72	2015	MT171379	/	/
Seq1357	FI01_69_LCO1490_37	Culicoides scoticus	571	Sotkamo	Finland	64.04	28.72	2015	MT171380	/	/
Seq1358	FI01_70_LCO1490_38	Culicoides scoticus	571	Sotkamo	Finland	64.04	28.72	2015	MT171381	/	/
Seq1359	FI01_71_LCO1490_39	Culicoides scoticus	571	Sotkamo	Finland	64.04	28.72	2015	MT171382	/	/
Seq1360	FI01_73_LCO1490_41	Culicoides scoticus	571	Sotkamo	Finland	64.04	28.72	2015	MT171383	/	/
Seq1361	FI01_74_LCO1490_42	Culicoides scoticus	571	Sotkamo	Finland	64.04	28.72	2015	MT171384	/	/
Seq1362	FI01_75_LCO1490_43	Culicoides scoticus	571	Sotkamo	Finland	64.04	28.72	2015	MT171385	/	/
Seq1363	FI01_76_LCO1490_44	Culicoides scoticus	571	Sotkamo	Finland	64.04	28.72	2015	MT171386	/	/
Seq1364	FI01_77_LCO1490_45	Culicoides scoticus	571	Sotkamo	Finland	64.04	28.72	2015	MT171387	/	/
Seq1365	FI01_78_LCO1490_46	Culicoides scoticus	571	Sotkamo	Finland	64.04	28.72	2015	MT171388	/	/
Seq1366	FI01_82_LCO1490_50	Culicoides scoticus	571	Sotkamo	Finland	64.04	28.72	2015	MT171389	/	/
Seq1367	FI01_83_LCO1490_51	Culicoides scoticus	571	Sotkamo	Finland	64.04	28.72	2015	MT171390	/	/
Seq1368	FI01_84_LCO1490_52	Culicoides scoticus	571	Sotkamo	Finland	64.04	28.72	2015	MT171391	/	/
Seq1369	FI01_86_LCO1490_54	Culicoides scoticus	571	Sotkamo	Finland	64.04	28.72	2015	MT171392	/	/
Seq1370	FI01_87_LCO1490_55	Culicoides scoticus	571	Sotkamo	Finland	64.04	28.72	2015	MT171393	/	/
Seq1371	FI01_88_LCO1490_56	Culicoides scoticus	571	Sotkamo	Finland	64.04	28.72	2015	MT171394	MT163130	MT175666
Seq1372	FI01_89_LCO1490_57	Culicoides scoticus	571	Sotkamo	Finland	64.04	28.72	2015	MT171395	/	/
Seq1373	FI01_90_LCO1490_58	Culicoides scoticus	571	Sotkamo	Finland	64.04	28.72	2015	MT171396	/	/
Seq1374	FI01_91_LCO1490_59	Culicoides scoticus	571	Sotkamo	Finland	64.04	28.72	2015	MT171397	/	/
Seq1375	FI01_93_LCO1490_61	Culicoides scoticus	571	Sotkamo	Finland	64.04	28.72	2015	MT171398	/	/
Seq1376	FI01_94_LCO1490_62	Culicoides scoticus	571	Sotkamo	Finland	64.04	28.72	2015	MT171399	/	/
Seq1377	FI01_95_LCO1490_63	Culicoides scoticus	571	Sotkamo	Finland	64.04	28.72	2015	MT171400	/	/
Seq1378	FI01_96_LCO1490_64	Culicoides scoticus	571	Sotkamo	Finland	64.04	28.72	2015	MT171401	/	/
Seq1379	FI03_01_LCO_33	Culicoides obsoletus clade O2	562	Pelkosenniemi	Finland	67.18	27.46	2015	MT171402	/	/
Seq1380	FI03_02_LCO_34	Culicoides obsoletus clade O2	562	Pelkosenniemi	Finland	67.18	27.46	2015	MT171403	/	/
Seq1381	FI03_03_LCO_35	Culicoides obsoletus clade O2	562	Pelkosenniemi	Finland	67.18	27.46	2015	MT171404	/	/
Seq1382	FI03_04_LCO_36	Culicoides obsoletus clade O2	562	Pelkosenniemi	Finland	67.18	27.46	2015	MT171405	/	/
Seq1383	FI03_05_LCO_37	Culicoides obsoletus clade O2	562	Pelkosenniemi	Finland	67.18	27.46	2015	MT171406	/	/
Seq1384	FI03_06_LCO_38	Culicoides obsoletus clade O2	562	Pelkosenniemi	Finland	67.18	27.46	2015	MT171407	/	/
Seq1385	FI03_07_LCO_39	Culicoides obsoletus clade O2	562	Pelkosenniemi	Finland	67.18	27.46	2015	MT171408	/	/
Seq1386	FI03_08_LCO_40	Culicoides obsoletus clade O2	562	Pelkosenniemi	Finland	67.18	27.46	2015	MT171409	/	/
Seq1387	FI03_09_LCO_41	Culicoides obsoletus clade O2	562	Pelkosenniemi	Finland	67.18	27.46	2015	MT171410	/	/
Seq1388	FI03_10_LCO_42	Culicoides obsoletus clade O2	565	Pelkosenniemi	Finland	67.18	27.46	2015	MT171411	/	/
Seq1389	FI03_101_LCO1490_37	Culicoides scoticus clade 2	565	Pelkosenniemi	Finland	67.18	27.46	2015	MT171412	/	/
Seq1390	FI03_102_LCO1490_38	Culicoides scoticus clade 2	565	Pelkosenniemi	Finland	67.18	27.46	2015	MT171413	/	/
Seq1391	FI03_103_LCO1490_39	Culicoides scoticus clade 2	565	Pelkosenniemi	Finland	67.18	27.46	2015	MT171414	/	/
Seq1392	FI03_104_LCO1490_40	Culicoides scoticus	565	Pelkosenniemi	Finland	67.18	27.46	2015	MT171415	/	/
Seq1393	FI03_105_LCO1490_41	Culicoides scoticus clade 2	565	Pelkosenniemi	Finland	67.18	27.46	2015	MT171416	/	/
Seq1394	FI03_107_LCO1490_43	Culicoides scoticus clade 2	565	Pelkosenniemi	Finland	67.18	27.46	2015	MT171417	/	/
Seq1395	FI03_108_LCO1490_44	Culicoides obsoletus clade O2	565	Pelkosenniemi	Finland	67.18	27.46	2015	MT171418	/	/
Seq1396	FI03_109_LCO1490_45	Culicoides obsoletus clade O2	562	Pelkosenniemi	Finland	67.18	27.46	2015	MT171419	/	/
Seq1397	FI03_11_LCO_43	Culicoides obsoletus clade O2	565	Pelkosenniemi	Finland	67.18	27.46	2015	MT171420	/	/
Seq1398	FI03_110_LCO1490_46	Culicoides scoticus clade 2	565	Pelkosenniemi	Finland	67.18	27.46	2015	MT171421	MT163131	MT175667
Seq1399	FI03_111_LCO1490_47	Culicoides scoticus	565	Pelkosenniemi	Finland	67.18	27.46	2015	MT171422	/	/
Seq1400	FI03_116_LCO1490_52	Culicoides scoticus	565	Pelkosenniemi	Finland	67.18	27.46	2015	MT171423	/	/
Seq1401	FI03_118_LCO1490_54	Culicoides scoticus clade 2	565	Pelkosenniemi	Finland	67.18	27.46	2015	MT171424	/	/
Seq1402	FI03_119_LCO1490_55	Culicoides scoticus	562	Pelkosenniemi	Finland	67.18	27.46	2015	MT171425	/	/
Seq1403	FI03_12_LCO_44	Culicoides obsoletus clade O2	565	Pelkosenniemi	Finland	67.18	27.46	2015	MT171426	/	/
Seq1404	FI03_121_LCO1490_57	Culicoides scoticus	565	Pelkosenniemi	Finland	67.18	27.46	2015	MT171427	/	/
Seq1405	FI03_122_LCO1490_58	Culicoides obsoletus clade O2	565	Pelkosenniemi	Finland	67.18	27.46	2015	MT171428	/	/
Seq1406	FI03_123_LCO1490_59	Culicoides scoticus clade 2	565	Pelkosenniemi	Finland	67.18	27.46	2015	MT171429	/	/
Seq1407	FI03_124_LCO1490_60	Culicoides scoticus clade 2	565	Pelkosenniemi	Finland	67.18	27.46	2015	MT171430	/	/
Seq1408	FI03_125_LCO1490_61	Culicoides scoticus	565	Pelkosenniemi	Finland	67.18	27.46	2015	MT171431	/	/
Seq1409	FI03_126_LCO1490_62	Culicoides scoticus clade 2	565	Pelkosenniemi	Finland	67.18	27.46	2015	MT171432	/	/
Seq1410	FI03_127_LCO1490_63	Culicoides scoticus clade 2	565	Pelkosenniemi	Finland	67.18	27.46	2015	MT171433	/	/
Seq1411	FI03_128_LCO1490_64	Culicoides scoticus clade 2	562	Pelkosenniemi	Finland	67.18	27.46	2015	MT171434	/	/
Seq1412	FI03_13_LCO_45	Culicoides obsoletus clade O2	562	Pelkosenniemi	Finland	67.18	27.46	2015	MT171435	/	/
Seq1413	FI03_14_LCO_46	Culicoides obsoletus clade O2	562	Pelkosenniemi	Finland	67.18	27.46	2015	MT171436	/	/
Seq1414	FI03_15_LCO_47	Culicoides obsoletus clade O2	562	Pelkosenniemi	Finland	67.18	27.46	2015	MT171437	/	/
Seq1415	FI03_16_LCO_48	Culicoides obsoletus clade O2	562	Pelkosenniemi	Finland	67.18	27.46	2015	MT171438	/	/
Seq1416	FI03_18_LCO_50	Culicoides obsoletus clade O2	562	Pelkosenniemi	Finland	67.18	27.46	2015	MT171439	/	/
Seq1417	FI03_19_LCO_51	Culicoides obsoletus clade O2	562	Pelkosenniemi	Finland	67.18	27.46	2015	MT171440	/	/
Seq1418	FI03_20_LCO_52	Culicoides obsoletus clade O2	562	Pelkosenniemi	Finland	67.18	27.46	2015	MT171441	/	/
Seq1419	FI03_22_LCO_54	Culicoides obsoletus clade O2	562	Pelkosenniemi	Finland	67.18	27.46	2015	MT171442	/	/
Seq1420	FI03_23_LCO_55	Culicoides obsoletus clade O2	562	Pelkosenniemi	Finland	67.18	27.46	2015	MT171443	/	/
Seq1421	FI03_24_LCO_56	Culicoides obsoletus clade O2	562	Pelkosenniemi	Finland	67.18	27.46	2015	MT171444	/	/
Seq1422	FI03_25_LCO_57	Culicoides obsoletus clade O2	562	Pelkosenniemi	Finland	67.18	27.46	2015	MT171445	/	/
Seq1423	FI03_26_LCO_58	Culicoides obsoletus clade O2	562	Pelkosenniemi	Finland	67.18	27.46	2015	MT171446	/	/
Seq1424	FI03_28_LCO_60	Culicoides obsoletus clade O2	562	Pelkosenniemi	Finland	67.18	27.46	2015	MT171447	/	/
Seq1425	FI03_29_LCO_61	Culicoides obsoletus clade O2	562	Pelkosenniemi	Finland	67.18	27.46	2015	MT171448	/	/
Seq1426	FI03_30_LCO_62	Culicoides obsoletus clade O2	562	Pelkosenniemi	Finland	67.18	27.46	2015	MT171449	/	/
Seq1427	FI03_31_LCO_63	Culicoides obsoletus clade O2	562	Pelkosenniemi	Finland	67.18	27.46	2015	MT171450	/	/
Seq1428	FI03_32_LCO_64	Culicoides obsoletus clade O2	562	Pelkosenniemi	Finland	67.18	27.46	2015	MT171451	/	/
Seq1429	FI03_33_LCO1490_65	Culicoides obsoletus clade O2	571	Pelkosenniemi	Finland	67.18	27.46	2015	MT171452	/	/
Seq1430	FI03_34_LCO1490_66	Culicoides obsoletus clade O2	571	Pelkosenniemi	Finland	67.18	27.46	2015	MT171453	/	/
Seq1431	FI03_35_LCO1490_67	Culicoides obsoletus clade O2	571	Pelkosenniemi	Finland	67.18	27.46	2015	MT171454	/	/
Seq1432	FI03_36_LCO1490_68	Culicoides obsoletus clade O2	571	Pelkosenniemi	Finland	67.18	27.46	2015	MT171455	/	/
Seq1433	FI03_37_LCO1490_69	Culicoides obsoletus clade O2	571	Pelkosenniemi	Finland	67.18	27.46	2015	MT171456	/	/
Seq1434	FI03_38_LCO1490_70	Culicoides obsoletus clade O2	571	Pelkosenniemi	Finland	67.18	27.46	2015	MT171457	/	/
Seq1435	FI03_39_LCO1490_71	Culicoides obsoletus clade O2	571	Pelkosenniemi	Finland	67.18	27.46	2015	MT171458	/	/
Seq1436	FI03_40_LCO1490_72	Culicoides obsoletus clade O2	571	Pelkosenniemi	Finland	67.18	27.46	2015	MT171459	/	/
Seq1437	FI03_41_LCO1490_73	Culicoides obsoletus clade O2	571	Pelkosenniemi	Finland	67.18	27.46	2015	MT171460	/	/
Seq1438	FI03_44_LCO1490_76	Culicoides obsoletus clade O2	571	Pelkosenniemi	Finland	67.18	27.46	2015	MT171461	/	/
Seq1439	FI03_45_LCO1490_77	Culicoides obsoletus clade O2	571	Pelkosenniemi	Finland	67.18	27.46	2015	MT171462	/	/
Seq1440	FI03_46_LCO1490_78	Culicoides obsoletus clade O2	571	Pelkosenniemi	Finland	67.18	27.46	2015	MT171463	/	/
Seq1441	FI03_47_LCO1490_79	Culicoides obsoletus clade O2	571	Pelkosenniemi	Finland	67.18	27.46	2015	MT171464	/	/
Seq1442	FI03_48_LCO1490_80	Culicoides obsoletus clade O2	571	Pelkosenniemi	Finland	67.18	27.46	2015	MT171465	/	/
Seq1443	FI03_49_LCO1490_81	Culicoides obsoletus clade O2	571	Pelkosenniemi	Finland	67.18	27.46	2015	MT171466	/	/
Seq1444	FI03_50_LCO1490_82	Culicoides obsoletus clade O2	571	Pelkosenniemi	Finland	67.18	27.46	2015	MT171467	/	/
Seq1445	FI03_51_LCO1490_83	Culicoides obsoletus clade O2	571	Pelkosenniemi	Finland	67.18	27.46	2015	MT171468	MT163132	MT175668
Seq1446	FI03_52_LCO1490_84	Culicoides obsoletus clade O2	571	Pelkosenniemi	Finland	67.18	27.46	2015	MT171469	/	/
Seq1447	FI03_53_LCO1490_85	Culicoides obsoletus clade O2	571	Pelkosenniemi	Finland	67.18	27.46	2015	MT171470	MT163133	MT175669
Seq1448	FI03_54_LCO1490_86	Culicoides obsoletus clade O2	571	Pelkosenniemi	Finland	67.18	27.46	2015	MT171471	/	/
Seq1449	FI03_55_LCO1490_87	Culicoides obsoletus clade O2	571	Pelkosenniemi	Finland	67.18	27.46	2015	MT171472	/	/
Seq1450	FI03_56_LCO1490_88	Culicoides obsoletus clade O2	571	Pelkosenniemi	Finland	67.18	27.46	2015	MT171473	/	/
Seq1451	FI03_57_LCO1490_89	Culicoides obsoletus clade O2	571	Pelkosenniemi	Finland	67.18	27.46	2015	MT171474	/	/
Seq1452	FI03_58_LCO1490_90	Culicoides obsoletus clade O2	571	Pelkosenniemi	Finland	67.18	27.46	2015	MT171475	/	/
Seq1453	FI03_59_LCO1490_91	Culicoides obsoletus clade O2	571	Pelkosenniemi	Finland	67.18	27.46	2015	MT171476	/	/
Seq1454	FI03_60_LCO1490_92	Culicoides obsoletus clade O2	571	Pelkosenniemi	Finland	67.18	27.46	2015	MT171477	/	/
Seq1455	FI03_62_LCO1490_94	Culicoides obsoletus clade O2	571	Pelkosenniemi	Finland	67.18	27.46	2015	MT171478	/	/
Seq1456	FI03_63_LCO1490_95	Culicoides obsoletus clade O2	571	Pelkosenniemi	Finland	67.18	27.46	2015	MT171479	/	/
Seq1457	FI03_64_LCO1490_96	Culicoides obsoletus clade O2	571	Pelkosenniemi	Finland	67.18	27.46	2015	MT171480	/	/
Seq1458	FI03_65_LCO1490_1	Culicoides obsoletus clade O2	565	Pelkosenniemi	Finland	67.18	27.46	2015	MT171481	/	/
Seq1459	FI03_66_LCO1490_2	Culicoides scoticus clade 2	565	Pelkosenniemi	Finland	67.18	27.46	2015	MT171482	/	/
Seq1460	FI03_67_LCO1490_3	Culicoides obsoletus clade O2	565	Pelkosenniemi	Finland	67.18	27.46	2015	MT171483	/	/
Seq1461	FI03_68_LCO1490_4	Culicoides obsoletus clade O2	565	Pelkosenniemi	Finland	67.18	27.46	2015	MT171484	/	/
Seq1462	FI03_69_LCO1490_5	Culicoides obsoletus clade O2	565	Pelkosenniemi	Finland	67.18	27.46	2015	MT171485	/	/
Seq1463	FI03_71_LCO1490_7	Culicoides obsoletus clade O2	565	Pelkosenniemi	Finland	67.18	27.46	2015	MT171486	/	/
Seq1464	FI03_72_LCO1490_8	Culicoides obsoletus clade O2	565	Pelkosenniemi	Finland	67.18	27.46	2015	MT171487	/	/
Seq1465	FI03_73_LCO1490_9	Culicoides obsoletus clade O2	565	Pelkosenniemi	Finland	67.18	27.46	2015	MT171488	/	/
Seq1466	FI03_74_LCO1490_10	Culicoides obsoletus clade O2	565	Pelkosenniemi	Finland	67.18	27.46	2015	MT171489	/	/
Seq1467	FI03_75_LCO1490_11	Culicoides obsoletus clade O2	565	Pelkosenniemi	Finland	67.18	27.46	2015	MT171490	/	/
Seq1468	FI03_76_LCO1490_12	Culicoides obsoletus clade O2	565	Pelkosenniemi	Finland	67.18	27.46	2015	MT171491	/	/
Seq1469	FI03_77_LCO1490_13	Culicoides obsoletus clade O2	565	Pelkosenniemi	Finland	67.18	27.46	2015	MT171492	/	/
Seq1470	FI03_78_LCO1490_14	Culicoides obsoletus clade O2	565	Pelkosenniemi	Finland	67.18	27.46	2015	MT171493	/	/
Seq1471	FI03_79_LCO1490_15	Culicoides obsoletus clade O2	565	Pelkosenniemi	Finland	67.18	27.46	2015	MT171494	/	/
Seq1472	FI03_80_LCO1490_16	Culicoides obsoletus clade O2	565	Pelkosenniemi	Finland	67.18	27.46	2015	MT171495	/	/
Seq1473	FI03_81_LCO1490_17	Culicoides obsoletus clade O2	565	Pelkosenniemi	Finland	67.18	27.46	2015	MT171496	/	/
Seq1474	FI03_82_LCO1490_18	Culicoides obsoletus clade O2	565	Pelkosenniemi	Finland	67.18	27.46	2015	MT171497	/	/
Seq1475	FI03_83_LCO1490_19	Culicoides obsoletus clade O2	565	Pelkosenniemi	Finland	67.18	27.46	2015	MT171498	/	/
Seq1476	FI03_84_LCO1490_20	Culicoides obsoletus clade O2	565	Pelkosenniemi	Finland	67.18	27.46	2015	MT171499	/	/
Seq1477	FI03_85_LCO1490_21	Culicoides obsoletus clade O2	565	Pelkosenniemi	Finland	67.18	27.46	2015	MT171500	/	/
Seq1478	FI03_86_LCO1490_22	Culicoides obsoletus clade O2	565	Pelkosenniemi	Finland	67.18	27.46	2015	MT171501	/	/
Seq1479	FI03_87_LCO1490_23	Culicoides obsoletus clade O2	565	Pelkosenniemi	Finland	67.18	27.46	2015	MT171502	/	/
Seq1480	FI03_89_LCO1490_25	Culicoides obsoletus clade O2	565	Pelkosenniemi	Finland	67.18	27.46	2015	MT171503	/	/
Seq1481	FI03_91_LCO1490_27	Culicoides obsoletus clade O2	565	Pelkosenniemi	Finland	67.18	27.46	2015	MT171504	/	/
Seq1482	FI03_92_LCO1490_28	Culicoides obsoletus clade O2	565	Pelkosenniemi	Finland	67.18	27.46	2015	MT171505	/	/
Seq1483	FI03_93_LCO1490_29	Culicoides obsoletus clade O2	565	Pelkosenniemi	Finland	67.18	27.46	2015	MT171506	/	/
Seq1484	FI03_94_LCO1490_30	Culicoides obsoletus clade O2	565	Pelkosenniemi	Finland	67.18	27.46	2015	MT171507	/	/
Seq1485	FI03_95_LCO1490_31	Culicoides obsoletus clade O2	565	Pelkosenniemi	Finland	67.18	27.46	2015	MT171508	/	/
Seq1486	FI03_96_LCO1490_32	Culicoides obsoletus clade O2	565	Pelkosenniemi	Finland	67.18	27.46	2015	MT171509	/	/
Seq1487	FI03_97_LCO1490_33	Culicoides scoticus clade 2	565	Pelkosenniemi	Finland	67.18	27.46	2015	MT171510	/	/
Seq1488	FI03_98_LCO1490_34	Culicoides scoticus clade 2	565	Pelkosenniemi	Finland	67.18	27.46	2015	MT171511	MT163134	MT175670
Seq1489	FI03_99_LCO1490_35	Culicoides obsoletus clade O2	565	Pelkosenniemi	Finland	67.18	27.46	2015	MT171512	/	/
Seq1490	FI04_01_LCO_65	Culicoides obsoletus clade O2	562	Inari	Finland	68.67	27.56	2015	MT171513	/	/
Seq1491	FI04_02_LCO_66	Culicoides obsoletus clade O2	562	Inari	Finland	68.67	27.56	2015	MT171514	/	/
Seq1492	FI04_04_LCO_68	Culicoides obsoletus clade O2	562	Inari	Finland	68.67	27.56	2015	MT171515	/	/
Seq1493	FI04_05_LCO_69	Culicoides obsoletus	562	Inari	Finland	68.67	27.56	2015	MT171516	/	/
Seq1494	FI04_06_LCO_70	Culicoides obsoletus clade O2	562	Inari	Finland	68.67	27.56	2015	MT171517	/	/
Seq1495	FI04_07_LCO_71	Culicoides obsoletus clade O2	562	Inari	Finland	68.67	27.56	2015	MT171518	/	/
Seq1496	FI04_09_LCO_73	Culicoides obsoletus clade O2	562	Inari	Finland	68.67	27.56	2015	MT171519	/	/
Seq1497	FI04_10_LCO_74	Culicoides obsoletus clade O2	562	Inari	Finland	68.67	27.56	2015	MT171520	/	/
Seq1498	FI04_11_LCO_75	Culicoides obsoletus clade O2	562	Inari	Finland	68.67	27.56	2015	MT171521	/	/
Seq1499	FI04_12_LCO_76	Culicoides obsoletus clade O2	562	Inari	Finland	68.67	27.56	2015	MT171522	/	/
Seq1500	FI04_13_LCO_77	Culicoides obsoletus clade O2	562	Inari	Finland	68.67	27.56	2015	MT171523	/	/
Seq1501	FI04_14_LCO_78	Culicoides obsoletus	562	Inari	Finland	68.67	27.56	2015	MT171524	/	/
Seq1502	FI04_15_LCO_79	Culicoides obsoletus clade O2	562	Inari	Finland	68.67	27.56	2015	MT171525	/	/
Seq1503	FI04_16_LCO_80	Culicoides obsoletus clade O2	562	Inari	Finland	68.67	27.56	2015	MT171526	/	/
Seq1504	FI04_17_LCO_81	Culicoides obsoletus	562	Inari	Finland	68.67	27.56	2015	MT171527	/	/
Seq1505	FI04_18_LCO_82	Culicoides obsoletus	562	Inari	Finland	68.67	27.56	2015	MT171528	/	/
Seq1506	FI04_19_LCO_83	Culicoides obsoletus	562	Inari	Finland	68.67	27.56	2015	MT171529	/	/
Seq1507	FI04_20_LCO_84	Culicoides obsoletus clade O2	562	Inari	Finland	68.67	27.56	2015	MT171530	/	/
Seq1508	FI04_21_LCO_85	Culicoides obsoletus clade O2	562	Inari	Finland	68.67	27.56	2015	MT171531	/	/
Seq1509	FI04_22_LCO_86	Culicoides obsoletus	562	Inari	Finland	68.67	27.56	2015	MT171532	/	/
Seq1510	FI04_23_LCO_87	Culicoides obsoletus clade O2	562	Inari	Finland	68.67	27.56	2015	MT171533	/	/
Seq1511	FI04_24_LCO_88	Culicoides obsoletus clade O2	562	Inari	Finland	68.67	27.56	2015	MT171534	/	/
Seq1512	FI04_25_LCO_89	Culicoides obsoletus clade O2	562	Inari	Finland	68.67	27.56	2015	MT171535	/	/
Seq1513	FI04_26_LCO_90	Culicoides obsoletus clade O2	562	Inari	Finland	68.67	27.56	2015	MT171536	/	/
Seq1514	FI04_27_LCO_91	Culicoides obsoletus clade O2	562	Inari	Finland	68.67	27.56	2015	MT171537	/	/
Seq1515	FI04_28_LCO_92	Culicoides obsoletus clade O2	562	Inari	Finland	68.67	27.56	2015	MT171538	/	/
Seq1516	FI04_30_LCO_94	Culicoides obsoletus clade O2	562	Inari	Finland	68.67	27.56	2015	MT171539	/	/
Seq1517	FI04_31_LCO_95	Culicoides obsoletus	562	Inari	Finland	68.67	27.56	2015	MT171540	/	/
Seq1518	FI04_32_LCO_96	Culicoides obsoletus clade O2	562	Inari	Finland	68.67	27.56	2015	MT171541	/	/
Seq1519	FI04_33_LCO1490_65	Culicoides obsoletus clade O2	565	Inari	Finland	68.67	27.56	2015	MT171542	/	/
Seq1520	FI04_34_LCO1490_66	Culicoides obsoletus clade O2	565	Inari	Finland	68.67	27.56	2015	MT171543	/	/
Seq1521	FI04_35_LCO1490_67	Culicoides obsoletus clade O2	565	Inari	Finland	68.67	27.56	2015	MT171544	/	/
Seq1522	FI04_36_LCO1490_68	Culicoides obsoletus clade O2	565	Inari	Finland	68.67	27.56	2015	MT171545	/	/
Seq1523	FI04_37_LCO1490_69	Culicoides obsoletus clade O2	565	Inari	Finland	68.67	27.56	2015	MT171546	/	/
Seq1524	FI04_38_LCO1490_70	Culicoides obsoletus clade O2	565	Inari	Finland	68.67	27.56	2015	MT171547	/	/
Seq1525	FI04_39_LCO1490_71	Culicoides obsoletus clade O2	565	Inari	Finland	68.67	27.56	2015	MT171548	/	/
Seq1526	FI04_40_LCO1490_72	Culicoides obsoletus clade O2	565	Inari	Finland	68.67	27.56	2015	MT171549	/	/
Seq1527	FI04_41_LCO1490_73	Culicoides obsoletus clade O2	565	Inari	Finland	68.67	27.56	2015	MT171550	/	/
Seq1528	FI04_42_LCO1490_74	Culicoides obsoletus clade O2	565	Inari	Finland	68.67	27.56	2015	MT171551	/	/
Seq1529	FI04_43_LCO1490_75	Culicoides obsoletus clade O2	565	Inari	Finland	68.67	27.56	2015	MT171552	/	/
Seq1530	FI04_44_LCO1490_76	Culicoides obsoletus clade O2	565	Inari	Finland	68.67	27.56	2015	MT171553	/	/
Seq1531	FI04_45_LCO1490_77	Culicoides obsoletus	565	Inari	Finland	68.67	27.56	2015	MT171554	/	/
Seq1532	FI04_46_LCO1490_78	Culicoides obsoletus clade O2	565	Inari	Finland	68.67	27.56	2015	MT171555	/	/
Seq1533	FI04_47_LCO1490_79	Culicoides obsoletus clade O2	565	Inari	Finland	68.67	27.56	2015	MT171556	/	/
Seq1534	FI04_49_LCO1490_81	Culicoides obsoletus clade O2	565	Inari	Finland	68.67	27.56	2015	MT171557	/	/
Seq1535	FI04_50_LCO1490_82	Culicoides obsoletus clade O2	565	Inari	Finland	68.67	27.56	2015	MT171558	/	/
Seq1536	FI04_51_LCO1490_83	Culicoides obsoletus clade O2	565	Inari	Finland	68.67	27.56	2015	MT171559	/	/
Seq1537	FI04_52_LCO1490_84	Culicoides obsoletus clade O2	565	Inari	Finland	68.67	27.56	2015	MT171560	/	/
Seq1538	FI04_53_LCO1490_85	Culicoides obsoletus clade O2	565	Inari	Finland	68.67	27.56	2015	MT171561	/	/
Seq1539	FI04_54_LCO1490_86	Culicoides obsoletus clade O2	565	Inari	Finland	68.67	27.56	2015	MT171562	/	/
Seq1540	FI04_55_LCO1490_87	Culicoides obsoletus clade O2	565	Inari	Finland	68.67	27.56	2015	MT171563	/	/
Seq1541	FI04_56_LCO1490_88	Culicoides obsoletus clade O2	565	Inari	Finland	68.67	27.56	2015	MT171564	/	/
Seq1542	FI04_57_LCO1490_89	Culicoides obsoletus clade O2	565	Inari	Finland	68.67	27.56	2015	MT171565	/	/
Seq1543	FI04_58_LCO1490_90	Culicoides scoticus clade 2	565	Inari	Finland	68.67	27.56	2015	MT171566	/	/
Seq1544	FI04_59_LCO1490_91	Culicoides obsoletus clade O2	565	Inari	Finland	68.67	27.56	2015	MT171567	/	/
Seq1545	FI04_60_LCO1490_92	Culicoides obsoletus clade O2	565	Inari	Finland	68.67	27.56	2015	MT171568	/	/
Seq1546	FI04_61_LCO1490_93	Culicoides obsoletus clade O2	565	Inari	Finland	68.67	27.56	2015	MT171569	/	/
Seq1547	FI04_62_LCO1490_94	Culicoides obsoletus clade O2	565	Inari	Finland	68.67	27.56	2015	MT171570	/	/
Seq1548	Fl01_3_1FINLAND_FIN_C1_LCO_1	Culicoides obsoletus	561	Sotkamo	Finland	64.04	28.72	2015	MT171571	/	/
Seq1549	Fl01_6_2FINLAND_FIN_F1_LCO_2	Culicoides obsoletus clade O2	561	Sotkamo	Finland	64.04	28.72	2015	MT171572	/	/
Seq1550	FR_42PL1_02_LCO_2	Culicoides obsoletus	604	Les Hitres	France	45.75	4.07	2016	MT171573	/	/
Seq1551	FR_42PL1_03_LCO_3	Culicoides obsoletus	612	Les Hitres	France	45.75	4.07	2016	MT171574	/	/
Seq1552	FR_42PL1_04_LCO_4	Culicoides obsoletus	613	Les Hitres	France	45.75	4.07	2016	MT171575	/	/
Seq1553	FR_42PL1_05_LCO_5	Culicoides scoticus	587	Les Hitres	France	45.75	4.07	2016	MT171576	/	/
Seq1554	FR_42PL1_06_LCO_6	Culicoides obsoletus	613	Les Hitres	France	45.75	4.07	2016	MT171577	/	/
Seq1555	FR_42PL1_07_LCO_7	Culicoides obsoletus	613	Les Hitres	France	45.75	4.07	2016	MT171578	/	/
Seq1556	FR_42PL1_08_LCO_8	Culicoides obsoletus	612	Les Hitres	France	45.75	4.07	2016	MT171579	/	/
Seq1557	FR_42PL1_09_LCO_9	Culicoides obsoletus	613	Les Hitres	France	45.75	4.07	2016	MT171580	/	/
Seq1558	FR_42PL1_10_LCO_10	Culicoides obsoletus	613	Les Hitres	France	45.75	4.07	2016	MT171581	/	/
Seq1559	FR_42PL1_11_LCO_11	Culicoides scoticus	624	Les Hitres	France	45.75	4.07	2016	MT171582	/	/
Seq1560	FR_42PL1_12_LCO_12	Culicoides obsoletus	613	Les Hitres	France	45.75	4.07	2016	MT171583	/	/
Seq1561	FR_42PL1_13_LCO_13	Culicoides obsoletus	613	Les Hitres	France	45.75	4.07	2016	MT171584	/	/
Seq1562	FR_42PL1_14_LCO_14	Culicoides obsoletus	613	Les Hitres	France	45.75	4.07	2016	MT171585	/	/
Seq1563	FR_42PL1_15_LCO_15	Culicoides obsoletus	613	Les Hitres	France	45.75	4.07	2016	MT171586	/	/
Seq1564	FR_42PL1_16_LCO_16	Culicoides obsoletus	612	Les Hitres	France	45.75	4.07	2016	MT171587	/	/
Seq1565	FR_42PL1_17_LCO_17	Culicoides scoticus	613	Les Hitres	France	45.75	4.07	2016	MT171588	/	/
Seq1566	FR_42PL1_18_LCO_18	Culicoides obsoletus	613	Les Hitres	France	45.75	4.07	2016	MT171589	/	/
Seq1567	FR_42PL1_19_LCO_19	Culicoides obsoletus	611	Les Hitres	France	45.75	4.07	2016	MT171590	/	/
Seq1568	FR_42PL1_20_LCO_20	Culicoides obsoletus	611	Les Hitres	France	45.75	4.07	2016	MT171591	/	/
Seq1569	FR_42PL1_21_LCO_21	Culicoides obsoletus	612	Les Hitres	France	45.75	4.07	2016	MT171592	/	/
Seq1570	FR_42PL1_22_LCO_22	Culicoides obsoletus	613	Les Hitres	France	45.75	4.07	2016	MT171593	/	/
Seq1571	FR_42PL1_23_LCO_23	Culicoides obsoletus	607	Les Hitres	France	45.75	4.07	2016	MT171594	/	/
Seq1572	FR_42PL1_24_LCO_24	Culicoides obsoletus	605	Les Hitres	France	45.75	4.07	2016	MT171595	/	/
Seq1573	FR_42PL1_25_LCO_25	Culicoides obsoletus	613	Les Hitres	France	45.75	4.07	2016	MT171596	/	/
Seq1574	FR_42PL1_26_LCO_26	Culicoides obsoletus	612	Les Hitres	France	45.75	4.07	2016	MT171597	/	/
Seq1575	FR_42PL1_27_LCO_27	Culicoides obsoletus	613	Les Hitres	France	45.75	4.07	2016	MT171598	/	/
Seq1576	FR_42PL1_28_LCO_28	Culicoides obsoletus	610	Les Hitres	France	45.75	4.07	2016	MT171599	/	/
Seq1577	FR_42PL1_29_LCO_29	Culicoides obsoletus	613	Les Hitres	France	45.75	4.07	2016	MT171600	/	/
Seq1578	FR_42PL1_30_LCO_30	Culicoides obsoletus	613	Les Hitres	France	45.75	4.07	2016	MT171601	/	/
Seq1579	FR_42PL1_31_LCO_31	Culicoides obsoletus	612	Les Hitres	France	45.75	4.07	2016	MT171602	/	/
Seq1580	FR_42PL1_32_LCO_32	Culicoides obsoletus	612	Les Hitres	France	45.75	4.07	2016	MT171603	/	/
Seq1581	FR_42PL1_33_LCO_33	Culicoides obsoletus	613	Les Hitres	France	45.75	4.07	2016	MT171604	/	/
Seq1582	FR_42PL1_34_LCO_34	Culicoides obsoletus	613	Les Hitres	France	45.75	4.07	2016	MT171605	/	/
Seq1583	FR_42PL1_35_LCO_35	Culicoides obsoletus	614	Les Hitres	France	45.75	4.07	2016	MT171606	/	/
Seq1584	FR_42PL1_36_LCO_36	Culicoides obsoletus	612	Les Hitres	France	45.75	4.07	2016	MT171607	/	/
Seq1585	FR_42PL1_37_LCO_37	Culicoides obsoletus	611	Les Hitres	France	45.75	4.07	2016	MT171608	/	/
Seq1586	FR_42PL1_38_LCO_38	Culicoides obsoletus	608	Les Hitres	France	45.75	4.07	2016	MT171609	/	/
Seq1587	FR_42PL1_39_LCO_39	Culicoides obsoletus	612	Les Hitres	France	45.75	4.07	2016	MT171610	/	/
Seq1588	FR_42PL1_40_LCO_40	Culicoides obsoletus	613	Les Hitres	France	45.75	4.07	2016	MT171611	/	/
Seq1589	FR_42PL1_41_LCO_41	Culicoides obsoletus	613	Les Hitres	France	45.75	4.07	2016	MT171612	/	/
Seq1590	FR_42PL1_42_LCO_42	Culicoides scoticus	613	Les Hitres	France	45.75	4.07	2016	MT171613	/	/
Seq1591	FR_42PL1_43_LCO_43	Culicoides obsoletus	613	Les Hitres	France	45.75	4.07	2016	MT171614	/	/
Seq1592	FR_42PL1_44_LCO_44	Culicoides obsoletus	612	Les Hitres	France	45.75	4.07	2016	MT171615	/	/
Seq1593	FR_42PL1_45_LCO_45	Culicoides obsoletus	614	Les Hitres	France	45.75	4.07	2016	MT171616	/	/
Seq1594	FR_42PL1_46_LCO_46	Culicoides obsoletus	613	Les Hitres	France	45.75	4.07	2016	MT171617	/	/
Seq1595	FR_42PL1_47_LCO_47	Culicoides obsoletus	612	Les Hitres	France	45.75	4.07	2016	MT171618	/	/
Seq1596	FR_42PL1_48_LCO_48	Culicoides obsoletus	613	Les Hitres	France	45.75	4.07	2016	MT171619	/	/
Seq1597	FR_44PL3_02_LCO_50	Culicoides obsoletus clade O2	612	Sucé-sur-Erdre	France	47.32	-1.54	2016	MT171620	/	/
Seq1598	FR_44PL3_03_LCO_51	Culicoides scoticus	613	Sucé-sur-Erdre	France	47.32	-1.54	2016	MT171621	/	/
Seq1600	FR_44PL3_06_LCO_54	Culicoides obsoletus clade O2	613	Sucé-sur-Erdre	France	47.32	-1.54	2016	MT171622	/	/
Seq1601	FR_44PL3_07_LCO_55	Culicoides scoticus	613	Sucé-sur-Erdre	France	47.32	-1.54	2016	MT171623	/	/
Seq1602	FR_44PL3_08_LCO_56	Culicoides obsoletus	611	Sucé-sur-Erdre	France	47.32	-1.54	2016	MT171624	/	/
Seq1603	FR_44PL3_09_LCO_57	Culicoides obsoletus	613	Sucé-sur-Erdre	France	47.32	-1.54	2016	MT171625	/	/
Seq1604	FR_44PL3_10_LCO_58	Culicoides obsoletus	613	Sucé-sur-Erdre	France	47.32	-1.54	2016	MT171626	/	/
Seq1605	FR_44PL3_11_LCO_59	Culicoides obsoletus	612	Sucé-sur-Erdre	France	47.32	-1.54	2016	MT171627	/	/
Seq1606	FR_44PL3_12_LCO_60	Culicoides obsoletus clade O2	614	Sucé-sur-Erdre	France	47.32	-1.54	2016	MT171628	/	/
Seq1607	FR_44PL3_13_LCO_61	Culicoides obsoletus	613	Sucé-sur-Erdre	France	47.32	-1.54	2016	MT171629	/	/
Seq1608	FR_44PL3_14_LCO_62	Culicoides obsoletus	609	Sucé-sur-Erdre	France	47.32	-1.54	2016	MT171630	/	/
Seq1609	FR_44PL3_15_LCO_63	Culicoides obsoletus	613	Sucé-sur-Erdre	France	47.32	-1.54	2016	MT171631	/	/
Seq1610	FR_44PL3_16_LCO_64	Culicoides scoticus	609	Sucé-sur-Erdre	France	47.32	-1.54	2016	MT171632	/	/
Seq1611	FR_44PL3_17_LCO_65	Culicoides scoticus	613	Sucé-sur-Erdre	France	47.32	-1.54	2016	MT171633	/	/
Seq1612	FR_44PL3_18_LCO_66	Culicoides obsoletus clade O2	613	Sucé-sur-Erdre	France	47.32	-1.54	2016	MT171634	/	/
Seq1613	FR_44PL3_19_LCO_67	Culicoides scoticus	613	Sucé-sur-Erdre	France	47.32	-1.54	2016	MT171635	/	/
Seq1614	FR_44PL3_20_LCO_68	Culicoides obsoletus clade O2	613	Sucé-sur-Erdre	France	47.32	-1.54	2016	MT171636	/	/
Seq1615	FR_44PL3_21_LCO_69	Culicoides obsoletus clade O2	611	Sucé-sur-Erdre	France	47.32	-1.54	2016	MT171637	/	/
Seq1616	FR_44PL3_22_LCO_70	Culicoides obsoletus clade O2	613	Sucé-sur-Erdre	France	47.32	-1.54	2016	MT171638	/	/
Seq1617	FR_44PL3_23_LCO_71	Culicoides obsoletus clade O2	612	Sucé-sur-Erdre	France	47.32	-1.54	2016	MT171639	/	/
Seq1618	FR_44PL3_24_LCO_72	Culicoides scoticus	591	Sucé-sur-Erdre	France	47.32	-1.54	2016	MT171640	/	/
Seq1619	FR_44PL3_25_LCO_73	Culicoides obsoletus clade O2	613	Sucé-sur-Erdre	France	47.32	-1.54	2016	MT171641	/	/
Seq1620	FR_44PL3_26_LCO_74	Culicoides obsoletus clade O2	613	Sucé-sur-Erdre	France	47.32	-1.54	2016	MT171642	/	/
Seq1621	FR_44PL3_27_LCO_75	Culicoides obsoletus clade O2	613	Sucé-sur-Erdre	France	47.32	-1.54	2016	MT171643	/	/
Seq1622	FR_44PL3_28_LCO_76	Culicoides scoticus	617	Sucé-sur-Erdre	France	47.32	-1.54	2016	MT171644	/	/
Seq1623	FR_44PL3_29_LCO_77	Culicoides obsoletus clade O2	613	Sucé-sur-Erdre	France	47.32	-1.54	2016	MT171645	/	/
Seq1624	FR_44PL3_30_LCO_78	Culicoides obsoletus clade O2	613	Sucé-sur-Erdre	France	47.32	-1.54	2016	MT171646	/	/
Seq1625	FR_44PL3_31_LCO_79	Culicoides scoticus	612	Sucé-sur-Erdre	France	47.32	-1.54	2016	MT171647	/	/
Seq1626	FR_44PL3_32_LCO_80	Culicoides scoticus	611	Sucé-sur-Erdre	France	47.32	-1.54	2016	MT171648	/	/
Seq1627	FR_44PL3_35_LCO_83	Culicoides scoticus	598	Sucé-sur-Erdre	France	47.32	-1.54	2016	MT171649	/	/
Seq1628	FR_44PL3_37_LCO_85	Culicoides scoticus	614	Sucé-sur-Erdre	France	47.32	-1.54	2016	MT171650	/	/
Seq1629	FR_44PL3_38_LCO_86	Culicoides obsoletus clade O2	613	Sucé-sur-Erdre	France	47.32	-1.54	2016	MT171651	/	/
Seq1630	FR_44PL3_39_LCO_87	Culicoides obsoletus clade O2	613	Sucé-sur-Erdre	France	47.32	-1.54	2016	MT171652	/	/
Seq1631	FR_44PL3_41_LCO_89	Culicoides obsoletus clade O2	612	Sucé-sur-Erdre	France	47.32	-1.54	2016	MT171653	/	/
Seq1632	FR_44PL3_42_LCO_90	Culicoides scoticus	613	Sucé-sur-Erdre	France	47.32	-1.54	2016	MT171654	/	/
Seq1633	FR_44PL3_43_LCO_91	Culicoides obsoletus	610	Sucé-sur-Erdre	France	47.32	-1.54	2016	MT171655	/	/
Seq1634	FR_44PL3_44_LCO_92	Culicoides scoticus	612	Sucé-sur-Erdre	France	47.32	-1.54	2016	MT171656	/	/
Seq1635	FR_44PL3_45_LCO_93	Culicoides scoticus	613	Sucé-sur-Erdre	France	47.32	-1.54	2016	MT171657	/	/
Seq1636	FR_44PL3_46_LCO_94	Culicoides scoticus	613	Sucé-sur-Erdre	France	47.32	-1.54	2016	MT171658	/	/
Seq1637	FR_44PL3_47_LCO_95	Culicoides obsoletus clade O2	613	Sucé-sur-Erdre	France	47.32	-1.54	2016	MT171659	/	/
Seq1638	FR_80PL2_02_LCO_2	Culicoides obsoletus	612	Bonnay	France	49.93	2.51	2016	MT171660	/	/
Seq1639	FR_80PL2_03_LCO_3	Culicoides obsoletus	613	Bonnay	France	49.93	2.51	2016	MT171661	MT163135	MT175671
Seq1640	FR_80PL2_04_LCO_4	Culicoides scoticus	596	Bonnay	France	49.93	2.51	2016	MT171662	/	/
Seq1641	FR_80PL2_05_LCO_5	Culicoides obsoletus	613	Bonnay	France	49.93	2.51	2016	MT171663	/	/
Seq1642	FR_80PL2_06_LCO_6	Culicoides obsoletus	613	Bonnay	France	49.93	2.51	2016	MT171664	/	/
Seq1643	FR_80PL2_07_LCO_7	Culicoides obsoletus	613	Bonnay	France	49.93	2.51	2016	MT171665	/	/
Seq1644	FR_80PL2_08_LCO_8	Culicoides obsoletus	613	Bonnay	France	49.93	2.51	2016	MT171666	/	/
Seq1645	FR_80PL2_09_LCO_9	Culicoides obsoletus	613	Bonnay	France	49.93	2.51	2016	MT171667	/	/
Seq1646	FR_80PL2_10_LCO_10	Culicoides obsoletus	613	Bonnay	France	49.93	2.51	2016	MT171668	/	/
Seq1647	FR_80PL2_11_LCO_11	Culicoides obsoletus	613	Bonnay	France	49.93	2.51	2016	MT171669	/	/
Seq1648	FR_80PL2_12_LCO_12	Culicoides obsoletus	613	Bonnay	France	49.93	2.51	2016	MT171670	/	/
Seq1649	FR_80PL2_13_LCO_13	Culicoides obsoletus	613	Bonnay	France	49.93	2.51	2016	MT171671	/	/
Seq1650	FR_80PL2_14_LCO_14	Culicoides obsoletus	613	Bonnay	France	49.93	2.51	2016	MT171672	/	/
Seq1651	FR_80PL2_15_LCO_15	Culicoides obsoletus	613	Bonnay	France	49.93	2.51	2016	MT171673	/	/
Seq1652	FR_80PL2_16_LCO_16	Culicoides obsoletus	613	Bonnay	France	49.93	2.51	2016	MT171674	/	/
Seq1653	FR_80PL2_17_LCO_17	Culicoides scoticus	591	Bonnay	France	49.93	2.51	2016	MT171675	/	/
Seq1654	FR_80PL2_18_LCO_18	Culicoides obsoletus	613	Bonnay	France	49.93	2.51	2016	MT171676	/	/
Seq1655	FR_80PL2_19_LCO_19	Culicoides obsoletus	613	Bonnay	France	49.93	2.51	2016	MT171677	/	/
Seq1656	FR_80PL2_20_LCO_20	Culicoides scoticus	605	Bonnay	France	49.93	2.51	2016	MT171678	/	/
Seq1657	FR_80PL2_21_LCO_21	Culicoides obsoletus	613	Bonnay	France	49.93	2.51	2016	MT171679	/	/
Seq1658	FR_80PL2_22_LCO_22	Culicoides obsoletus	613	Bonnay	France	49.93	2.51	2016	MT171680	/	/
Seq1659	FR_80PL2_23_LCO_23	Culicoides obsoletus	613	Bonnay	France	49.93	2.51	2016	MT171681	/	/
Seq1660	FR_80PL2_24_LCO_24	Culicoides obsoletus	613	Bonnay	France	49.93	2.51	2016	MT171682	/	/
Seq1661	FR_80PL2_26_LCO_26	Culicoides obsoletus	613	Bonnay	France	49.93	2.51	2016	MT171683	/	/
Seq1662	FR_80PL2_27_LCO_27	Culicoides obsoletus	613	Bonnay	France	49.93	2.51	2016	MT171684	/	/
Seq1663	FR_80PL2_28_LCO_28	Culicoides obsoletus	613	Bonnay	France	49.93	2.51	2016	MT171685	/	/
Seq1664	FR_80PL2_29_LCO_29	Culicoides obsoletus	613	Bonnay	France	49.93	2.51	2016	MT171686	/	/
Seq1665	FR_80PL2_30_LCO_30	Culicoides obsoletus	613	Bonnay	France	49.93	2.51	2016	MT171687	/	/
Seq1666	FR_80PL2_31_LCO_31	Culicoides obsoletus	613	Bonnay	France	49.93	2.51	2016	MT171688	/	/
Seq1667	FR_80PL2_32_LCO_32	Culicoides obsoletus	612	Bonnay	France	49.93	2.51	2016	MT171689	/	/
Seq1668	FR_80PL2_33_LCO_33	Culicoides obsoletus	612	Bonnay	France	49.93	2.51	2016	MT171690	/	/
Seq1669	FR_80PL2_34_LCO_34	Culicoides obsoletus	614	Bonnay	France	49.93	2.51	2016	MT171691	/	/
Seq1670	FR_80PL2_35_LCO_35	Culicoides scoticus	606	Bonnay	France	49.93	2.51	2016	MT171692	/	/
Seq1671	FR_80PL2_36_LCO_36	Culicoides obsoletus	613	Bonnay	France	49.93	2.51	2016	MT171693	/	/
Seq1672	FR_80PL2_37_LCO_37	Culicoides obsoletus	613	Bonnay	France	49.93	2.51	2016	MT171694	/	/
Seq1673	FR_80PL2_38_LCO_38	Culicoides scoticus	599	Bonnay	France	49.93	2.51	2016	MT171695	MT163136	MT175672
Seq1674	FR_80PL2_39_LCO_39	Culicoides scoticus	608	Bonnay	France	49.93	2.51	2016	MT171696	/	/
Seq1675	FR_80PL2_41_LCO_41	Culicoides obsoletus	613	Bonnay	France	49.93	2.51	2016	MT171697	/	/
Seq1676	FR_80PL2_42_LCO_42	Culicoides obsoletus	613	Bonnay	France	49.93	2.51	2016	MT171698	/	/
Seq1677	FR_80PL2_43_LCO_43	Culicoides obsoletus	613	Bonnay	France	49.93	2.51	2016	MT171699	/	/
Seq1678	FR_80PL2_44_LCO_44	Culicoides obsoletus	613	Bonnay	France	49.93	2.51	2016	MT171700	/	/
Seq1679	FR_80PL2_45_LCO_45	Culicoides obsoletus	613	Bonnay	France	49.93	2.51	2016	MT171701	/	/
Seq1680	FR_80PL2_46_LCO_46	Culicoides obsoletus	613	Bonnay	France	49.93	2.51	2016	MT171702	/	/
Seq1681	FR_80PL2_47_LCO_47	Culicoides obsoletus	613	Bonnay	France	49.93	2.51	2016	MT171703	/	/
Seq1682	FR_80PL2_48_LCO_48	Culicoides obsoletus	613	Bonnay	France	49.93	2.51	2016	MT171704	/	/
Seq1683	FR_83PL2_10_LCO_2	Culicoides scoticus	607	Barjols	France	43.54	5.98	2016	MT171705	/	/
Seq1684	FR_83PL2_11_LCO_3	Culicoides scoticus	613	Barjols	France	43.54	5.98	2016	MT171706	/	/
Seq1685	FR_83PL2_12_LCO_4	Culicoides scoticus	611	Barjols	France	43.54	5.98	2016	MT171707	/	/
Seq1686	FR_83PL2_14_LCO_6	Culicoides obsoletus	613	Barjols	France	43.54	5.98	2016	MT171708	/	/
Seq1687	FR_83PL2_15_LCO_7	Culicoides obsoletus	613	Barjols	France	43.54	5.98	2016	MT171709	/	/
Seq1688	FR_83PL2_16_LCO_8	Culicoides obsoletus	614	Barjols	France	43.54	5.98	2016	MT171710	/	/
Seq1689	FR_83PL2_18_LCO_10	Culicoides scoticus	601	Barjols	France	43.54	5.98	2016	MT171711	/	/
Seq1690	FR_83PL2_19_LCO_11	Culicoides obsoletus	613	Barjols	France	43.54	5.98	2016	MT171712	/	/
Seq1691	FR_83PL2_20_LCO_12	Culicoides scoticus	611	Barjols	France	43.54	5.98	2016	MT171713	/	/
Seq1693	FR_83PL2_22_LCO_14	Culicoides scoticus	613	Barjols	France	43.54	5.98	2016	MT171714	/	/
Seq1694	FR_83PL2_23_LCO_15	Culicoides scoticus	608	Barjols	France	43.54	5.98	2016	MT171715	/	/
Seq1695	FR_83PL2_24_LCO_16	Culicoides obsoletus	613	Barjols	France	43.54	5.98	2016	MT171716	/	/
Seq1696	FR_83PL2_25_LCO_17	Culicoides obsoletus	613	Barjols	France	43.54	5.98	2016	MT171717	/	/
Seq1697	FR_83PL2_26_LCO_18	Culicoides scoticus	614	Barjols	France	43.54	5.98	2016	MT171718	/	/
Seq1698	FR_83PL2_27_LCO_19	Culicoides scoticus	611	Barjols	France	43.54	5.98	2016	MT171719	/	/
Seq1699	FR_83PL2_28_LCO_20	Culicoides scoticus	618	Barjols	France	43.54	5.98	2016	MT171720	/	/
Seq1700	FR_83PL2_29_LCO_21	Culicoides obsoletus	613	Barjols	France	43.54	5.98	2016	MT171721	/	/
Seq1701	FR_83PL2_30_LCO_22	Culicoides obsoletus	613	Barjols	France	43.54	5.98	2016	MT171722	/	/
Seq1702	FR_83PL2_31_LCO_23	Culicoides scoticus	613	Barjols	France	43.54	5.98	2016	MT171723	/	/
Seq1703	FR_83PL2_32_LCO_24	Culicoides scoticus	613	Barjols	France	43.54	5.98	2016	MT171724	/	/
Seq1704	FR_83PL2_33_LCO_25	Culicoides obsoletus	613	Barjols	France	43.54	5.98	2016	MT171725	/	/
Seq1705	FR_83PL2_34_LCO_26	Culicoides obsoletus	615	Barjols	France	43.54	5.98	2016	MT171726	/	/
Seq1706	FR_83PL2_35_LCO_27	Culicoides obsoletus	613	Barjols	France	43.54	5.98	2016	MT171727	/	/
Seq1707	FR_83PL2_37_LCO_29	Culicoides scoticus	608	Barjols	France	43.54	5.98	2016	MT171728	/	/
Seq1708	FR_83PL2_38_LCO_30	Culicoides scoticus	612	Barjols	France	43.54	5.98	2016	MT171729	/	/
Seq1709	FR_83PL2_39_LCO_31	Culicoides obsoletus	613	Barjols	France	43.54	5.98	2016	MT171730	/	/
Seq1710	FR_83PL2_40_LCO_32	Culicoides obsoletus	613	Barjols	France	43.54	5.98	2016	MT171731	/	/
Seq1711	FR_CORREZE01_LCO1490_33	Culicoides obsoletus	558	Reygnac	France	45.3429	1.81764	2016	MT171732	/	/
Seq1712	FR_CORREZE02_LCO1490_34	Culicoides obsoletus clade O2	558	Reygnac	France	45.3429	1.81764	2016	MT171733	/	/
Seq1713	FR_CORREZE03_LCO1490_35	Culicoides obsoletus	558	Reygnac	France	45.3429	1.81764	2016	MT171734	/	/
Seq1714	FR_CORREZE04_LCO1490_36	Culicoides obsoletus clade O2	558	Reygnac	France	45.3429	1.81764	2016	MT171735	/	/
Seq1715	FR_CORREZE05_LCO1490_37	Culicoides obsoletus clade dark	558	Reygnac	France	45.3429	1.81764	2016	MT171736	/	/
Seq1716	FR_CORREZE06_LCO1490_38	Culicoides obsoletus	558	Reygnac	France	45.3429	1.81764	2016	MT171737	/	/
Seq1717	FR_CORREZE07_LCO1490_39	Culicoides obsoletus clade dark	558	Reygnac	France	45.3429	1.81764	2016	MT171738	/	/
Seq1718	FR_CORREZE08_LCO1490_40	Culicoides obsoletus clade dark	558	Reygnac	France	45.3429	1.81764	2016	MT171739	/	/
Seq1719	FR_CORREZE09_LCO1490_41	Culicoides obsoletus clade dark	558	Reygnac	France	45.3429	1.81764	2016	MT171740	/	/
Seq1720	FR_CORREZE10_LCO1490_42	Culicoides obsoletus clade O2	558	Reygnac	France	45.3429	1.81764	2016	MT171741	/	/
Seq1721	FR_CORREZE11_LCO1490_43	Culicoides obsoletus clade dark	558	Reygnac	France	45.3429	1.81764	2016	MT171742	/	/
Seq1722	FR_CORREZE12_LCO1490_44	Culicoides obsoletus clade dark	558	Reygnac	France	45.3429	1.81764	2016	MT171743	/	/
Seq1723	FR_CORREZE13_LCO_8	Culicoides obsoletus	587	Reygnac	France	45.3429	1.81764	2016	MT171744	/	/
Seq1724	FR_CORREZE15_LCO1490_47	Culicoides obsoletus clade O2	558	Reygnac	France	45.3429	1.81764	2016	MT171745	/	/
Seq1725	FR_CORREZE16_LCO1490_48	Culicoides obsoletus clade O2	558	Reygnac	France	45.3429	1.81764	2016	MT171746	/	/
Seq1726	FR_CORREZE17_LCO1490_49	Culicoides obsoletus	558	Reygnac	France	45.3429	1.81764	2016	MT171747	/	/
Seq1727	FR_CORREZE18_LCO1490_50	Culicoides obsoletus	558	Reygnac	France	45.3429	1.81764	2016	MT171748	/	/
Seq1728	FR_CORREZE19_LCO1490_51	Culicoides obsoletus	558	Reygnac	France	45.3429	1.81764	2016	MT171749	/	/
Seq1729	FR_CORREZE20_LCO1490_52	Culicoides obsoletus clade dark	558	Reygnac	France	45.3429	1.81764	2016	MT171750	/	/
Seq1730	FR_CORREZE21_LCO1490_53	Culicoides obsoletus	558	Reygnac	France	45.3429	1.81764	2016	MT171751	/	/
Seq1731	FR_CORREZE22_LCO1490_54	Culicoides obsoletus	558	Reygnac	France	45.3429	1.81764	2016	MT171752	/	/
Seq1732	FR_CORREZE23_LCO1490_55	Culicoides obsoletus clade O2	558	Reygnac	France	45.3429	1.81764	2016	MT171753	/	/
Seq1734	FR_CORREZE25_LCO1490_57	Culicoides obsoletus clade dark	558	Reygnac	France	45.3429	1.81764	2016	MT171754	/	/
Seq1735	FR_CORREZE26_LCO1490_58	Culicoides obsoletus clade dark	558	Reygnac	France	45.3429	1.81764	2016	MT171755	/	/
Seq1736	FR_CORREZE27_LCO1490_59	Culicoides obsoletus clade dark	558	Reygnac	France	45.3429	1.81764	2016	MT171756	/	/
Seq1737	FR_CORREZE28_LCO1490_60	Culicoides obsoletus	558	Reygnac	France	45.3429	1.81764	2016	MT171757	/	/
Seq1738	FR_CORREZE29_LCO1490_61	Culicoides obsoletus clade dark	558	Reygnac	France	45.3429	1.81764	2016	MT171758	/	/
Seq1739	FR_CORREZE30_LCO_LCO1490_1	Culicoides obsoletus	565	Reygnac	France	45.3429	1.81764	2016	MT171759	/	/
Seq1740	FR_CORREZE31_LCO1490_63	Culicoides obsoletus clade dark	558	Reygnac	France	45.3429	1.81764	2016	MT171760	/	/
Seq1741	FR_CORREZE32_LCO1490_64	Culicoides obsoletus clade O2	558	Reygnac	France	45.3429	1.81764	2016	MT171761	/	/
Seq1742	GB_Eco_1_01_A1_LCO	Culicoides obsoletus	611	Abercorn	Great britain	55.9951	-3.45528	2014	MT171762	/	/
Seq1743	GB_Eco_1_02_B1_LCO	Culicoides obsoletus	613	Abercorn	Great britain	55.9951	-3.45528	2014	MT171763	/	/
Seq1744	GB_Eco_1_03_C1_LCO	Culicoides scoticus	616	Abercorn	Great britain	55.9951	-3.45528	2014	MT171764	/	/
Seq1745	GB_Eco_1_04_D1_LCO	Culicoides obsoletus	613	Abercorn	Great britain	55.9951	-3.45528	2014	MT171765	/	/
Seq1746	GB_Eco_1_05_E1_LCO	Culicoides scoticus	613	Abercorn	Great britain	55.9951	-3.45528	2014	MT171766	/	/
Seq1747	GB_Eco_1_07_G1_LCO	Culicoides obsoletus	613	Abercorn	Great britain	55.9951	-3.45528	2014	MT171767	/	/
Seq1749	GB_Eco_1_10_B2_LCO	Culicoides obsoletus	613	Abercorn	Great britain	55.9951	-3.45528	2014	MT171768	/	/
Seq1750	GB_Eco_1_11_C2_LCO	Culicoides obsoletus	613	Abercorn	Great britain	55.9951	-3.45528	2014	MT171769	/	/
Seq1751	GB_Eco_1_12_D2_LCO	Culicoides obsoletus	613	Abercorn	Great britain	55.9951	-3.45528	2014	MT171770	/	/
Seq1752	GB_Eco_1_13_E2_LCO	Culicoides obsoletus	610	Abercorn	Great britain	55.9951	-3.45528	2014	MT171771	/	/
Seq1753	GB_Eco_1_14_F2_LCO	Culicoides obsoletus	612	Abercorn	Great britain	55.9951	-3.45528	2014	MT171772	/	/
Seq1754	GB_Eco_1_15_G2_LCO	Culicoides scoticus	609	Abercorn	Great britain	55.9951	-3.45528	2014	MT171773	/	/
Seq1755	GB_Eco_1_16_H2_LCO	Culicoides scoticus	622	Abercorn	Great britain	55.9951	-3.45528	2014	MT171774	/	/
Seq1756	GB_Eco_1_17_A3_LCO	Culicoides obsoletus	613	Abercorn	Great britain	55.9951	-3.45528	2014	MT171775	/	/
Seq1757	GB_Eco_1_18_B3_LCO	Culicoides obsoletus	614	Abercorn	Great britain	55.9951	-3.45528	2014	MT171776	/	/
Seq1758	GB_Eco_1_19_C3_LCO	Culicoides scoticus	613	Abercorn	Great britain	55.9951	-3.45528	2014	MT171777	/	/
Seq1759	GB_Eco_1_20_D3_LCO	Culicoides scoticus	613	Abercorn	Great britain	55.9951	-3.45528	2014	MT171778	/	/
Seq1761	GB_Eco_2_02_F3_LCO	Culicoides scoticus	614	Abercorn	Great britain	51.18	-3.46658	2014	MT171779	/	/
Seq1762	GB_Eco_2_03_G3_LCO	Culicoides obsoletus	613	Abercorn	Great britain	51.18	-3.46658	2014	MT171780	/	/
Seq1763	GB_Eco_2_04_H3_LCO	Culicoides scoticus	615	Abercorn	Great britain	51.18	-3.46658	2014	MT171781	/	/
Seq1764	GB_Eco_2_05_A4_LCO	Culicoides scoticus	613	Abercorn	Great britain	51.18	-3.46658	2014	MT171782	/	/
Seq1765	GB_Eco_2_08_D4_LCO	Culicoides scoticus	613	Abercorn	Great britain	51.18	-3.46658	2014	MT171783	/	/
Seq1766	GB_Eco_2_09_E4_LCO	Culicoides obsoletus	613	Abercorn	Great britain	51.18	-3.46658	2014	MT171784	/	/
Seq1767	GB_Eco_2_10_F4_LCO	Culicoides obsoletus	611	Abercorn	Great britain	51.18	-3.46658	2014	MT171785	/	/
Seq1768	GB_Eco_2_12_H4_LCO	Culicoides scoticus	614	Abercorn	Great britain	51.18	-3.46658	2014	MT171786	/	/
Seq1770	GB_Eco_2_14_B5_LCO	Culicoides scoticus	614	Abercorn	Great britain	51.18	-3.46658	2014	MT171787	/	/
Seq1771	GB_Eco_2_15_C5_LCO	Culicoides scoticus	617	Abercorn	Great britain	51.18	-3.46658	2014	MT171788	/	/
Seq1772	GB_Eco_2_16_D5_LCO	Culicoides obsoletus	613	Abercorn	Great britain	51.18	-3.46658	2014	MT171789	/	/
Seq1773	GB_Eco_2_17_E5_LCO	Culicoides obsoletus	613	Abercorn	Great britain	51.18	-3.46658	2014	MT171790	/	/
Seq1774	GB_Eco_2_18_F5_LCO	Culicoides scoticus	620	Abercorn	Great britain	51.18	-3.46658	2014	MT171791	/	/
Seq1775	GB_Eco_2_19_G5_LCO	Culicoides scoticus	514	Abercorn	Great britain	51.18	-3.46658	2014	MT171792	/	/
Seq1776	GB_Eco_2_20_H5_LCO	Culicoides scoticus	615	Abercorn	Great britain	51.18	-3.46658	2014	MT171793	/	/
Seq1777	GB_Eco_3_01_A6_LCO	Culicoides obsoletus	613	Abercorn	Great britain	55.999	-3.47519	2014	MT171794	/	/
Seq1778	GB_Eco_3_03_C6_LCO	Culicoides scoticus	613	Abercorn	Great britain	55.999	-3.47519	2014	MT171795	/	/
Seq1779	GB_Eco_3_04_D6_LCO	Culicoides scoticus	615	Abercorn	Great britain	55.999	-3.47519	2014	MT171796	/	/
Seq1780	GB_Eco_4_01_E6_LCO	Culicoides obsoletus	613	Abercorn	Great britain	51.18	-3.47373	2014	MT171797	/	/
Seq1781	GB_Eco_4_02_F6_LCO	Culicoides obsoletus	613	Abercorn	Great britain	51.18	-3.47373	2014	MT171798	/	/
Seq1782	GB_Eco_4_03_G6_LCO	Culicoides obsoletus	613	Abercorn	Great britain	51.18	-3.47373	2014	MT171799	/	/
Seq1783	GB_Eco_4_04_H6_LCO	Culicoides obsoletus	610	Abercorn	Great britain	51.18	-3.47373	2014	MT171800	/	/
Seq1784	GB_Eco_5_01_A7_LCO	Culicoides scoticus	618	Abercorn	Great britain	55.9997	-3.47127	2014	MT171801	/	/
Seq1787	GB_Eco_5_04_D7_LCO	Culicoides obsoletus	613	Abercorn	Great britain	55.9997	-3.47127	2014	MT171802	/	/
Seq1788	GB_Eco_6_01_E7_LCO	Culicoides scoticus	613	Abercorn	Great britain	55.9969	3.46626	2014	MT171803	/	/
Seq1790	GB_Eco_6_05_A8_LCO	Culicoides obsoletus	614	Abercorn	Great britain	55.9969	3.46626	2014	MT171804	/	/
Seq1791	GB_Eco_6_06_B8_LCO	Culicoides obsoletus	613	Abercorn	Great britain	55.9969	3.46626	2014	MT171805	/	/
Seq1792	GB_Eco_6_08_D8_LCO	Culicoides scoticus	620	Abercorn	Great britain	55.9969	3.46626	2014	MT171806	/	/
Seq1793	GB_ENG1_01_LCO_49	Culicoides obsoletus	613	Blackmoor	Great britain	51.18	-3.94	2015	MT171807	/	/
Seq1794	GB_ENG1_02_LCO_50	Culicoides obsoletus	613	Blackmoor	Great britain	51.18	-3.94	2015	MT171808	/	/
Seq1796	GB_ENG1_05_LCO_53	Culicoides montanus	615	Blackmoor	Great britain	51.18	-3.94	2015	MT171809	/	/
Seq1797	GB_ENG1_06_LCO_54	Culicoides obsoletus	615	Blackmoor	Great britain	51.18	-3.94	2015	MT171810	/	/
Seq1798	GB_ENG1_07_LCO_55	Culicoides obsoletus	610	Blackmoor	Great britain	51.18	-3.94	2015	MT171811	/	/
Seq1799	GB_ENG1_10_LCO_58	Culicoides obsoletus	614	Blackmoor	Great britain	51.18	-3.94	2015	MT171812	/	/
Seq1800	GB_ENG1_11_LCO_59	Culicoides obsoletus	616	Blackmoor	Great britain	51.18	-3.94	2015	MT171813	/	/
Seq1801	GB_ENG1_12_LCO_60	Culicoides obsoletus	615	Blackmoor	Great britain	51.18	-3.94	2015	MT171814	/	/
Seq1802	GB_ENG1_13_LCO_61	Culicoides obsoletus	613	Blackmoor	Great britain	51.18	-3.94	2015	MT171815	/	/
Seq1803	GB_ENG1_14_LCO_62	Culicoides obsoletus	620	Blackmoor	Great britain	51.18	-3.94	2015	MT171816	/	/
Seq1804	GB_ENG1_15_LCO_63	Culicoides obsoletus	614	Blackmoor	Great britain	51.18	-3.94	2015	MT171817	/	/
Seq1805	GB_ENG1_16_LCO_64	Culicoides obsoletus	613	Blackmoor	Great britain	51.18	-3.94	2015	MT171818	/	/
Seq1806	GB_ENG1_18_LCO_66	Culicoides obsoletus	613	Blackmoor	Great britain	51.18	-3.94	2015	MT171819	/	/
Seq1807	GB_ENG1_19_LCO_67	Culicoides obsoletus	614	Blackmoor	Great britain	51.18	-3.94	2015	MT171820	/	/
Seq1808	GB_ENG1_20_LCO_68	Culicoides obsoletus	614	Blackmoor	Great britain	51.18	-3.94	2015	MT171821	/	/
Seq1809	GB_ENG1_21_LCO_69	Culicoides obsoletus	613	Blackmoor	Great britain	51.18	-3.94	2015	MT171822	/	/
Seq1810	GB_ENG1_22_LCO_70	Culicoides obsoletus	613	Blackmoor	Great britain	51.18	-3.94	2015	MT171823	/	/
Seq1811	GB_ENG1_23_LCO_71	Culicoides obsoletus	613	Blackmoor	Great britain	51.18	-3.94	2015	MT171824	/	/
Seq1812	GB_ENG1_24_LCO_72	Culicoides obsoletus	615	Blackmoor	Great britain	51.18	-3.94	2015	MT171825	/	/
Seq1813	GB_ENG1_27_LCO_75	Culicoides obsoletus	613	Blackmoor	Great britain	51.18	-3.94	2015	MT171826	/	/
Seq1814	GB_ENG1_28_LCO_76	Culicoides obsoletus	614	Blackmoor	Great britain	51.18	-3.94	2015	MT171827	/	/
Seq1815	GB_ENG1_29_LCO_77	Culicoides obsoletus	616	Blackmoor	Great britain	51.18	-3.94	2015	MT171828	/	/
Seq1816	GB_ENG1_30_LCO_78	Culicoides obsoletus	613	Blackmoor	Great britain	51.18	-3.94	2015	MT171829	/	/
Seq1818	GB_ENG1_35_LCO_83	Culicoides obsoletus	614	Blackmoor	Great britain	51.18	-3.94	2015	MT171830	/	/
Seq1819	GB_ENG1_36_LCO_84	Culicoides obsoletus	614	Blackmoor	Great britain	51.18	-3.94	2015	MT171831	/	/
Seq1820	GB_ENG1_37_LCO_85	Culicoides obsoletus	611	Blackmoor	Great britain	51.18	-3.94	2015	MT171832	/	/
Seq1821	GB_ENG1_38_LCO_86	Culicoides scoticus	613	Blackmoor	Great britain	51.18	-3.94	2015	MT171833	/	/
Seq1822	GB_ENG1_39_LCO_87	Culicoides obsoletus	614	Blackmoor	Great britain	51.18	-3.94	2015	MT171834	/	/
Seq1823	GB_ENG1_40_LCO_88	Culicoides obsoletus	616	Blackmoor	Great britain	51.18	-3.94	2015	MT171835	/	/
Seq1824	GB_ENG1_43_LCO_91	Culicoides obsoletus	616	Blackmoor	Great britain	51.18	-3.94	2015	MT171836	/	/
Seq1825	GB_ENG1_44_LCO_92	Culicoides scoticus	600	Blackmoor	Great britain	51.18	-3.94	2015	MT171837	/	/
Seq1826	GB_ENG1_45_LCO_93	Culicoides obsoletus	614	Blackmoor	Great britain	51.18	-3.94	2015	MT171838	/	/
Seq1827	GB_ENG1_46_LCO_94	Culicoides obsoletus	616	Blackmoor	Great britain	51.18	-3.94	2015	MT171839	/	/
Seq1828	GB_ENG2_01_LCO_1	Culicoides scoticus	620	Thorpe	Great britain	53.04	-1.78	2015	MT171840	/	/
Seq1829	GB_ENG2_02_LCO_2	Culicoides obsoletus	614	Thorpe	Great britain	53.04	-1.78	2015	MT171841	/	/
Seq1830	GB_ENG2_03_LCO_3	Culicoides obsoletus	613	Thorpe	Great britain	53.04	-1.78	2015	MT171842	/	/
Seq1831	GB_ENG2_04_LCO_4	Culicoides scoticus	613	Thorpe	Great britain	53.04	-1.78	2015	MT171843	/	/
Seq1832	GB_ENG2_05_LCO_5	Culicoides obsoletus	613	Thorpe	Great britain	53.04	-1.78	2015	MT171844	/	/
Seq1833	GB_ENG2_06_LCO_6	Culicoides scoticus	590	Thorpe	Great britain	53.04	-1.78	2015	MT171845	/	/
Seq1834	GB_ENG2_07_LCO_7	Culicoides obsoletus	613	Thorpe	Great britain	53.04	-1.78	2015	MT171846	/	/
Seq1835	GB_ENG2_08_LCO_8	Culicoides obsoletus	615	Thorpe	Great britain	53.04	-1.78	2015	MT171847	/	/
Seq1836	GB_ENG2_12_LCO_12	Culicoides obsoletus	612	Thorpe	Great britain	53.04	-1.78	2015	MT171848	/	/
Seq1837	GB_ENG2_13_LCO_13	Culicoides obsoletus	616	Thorpe	Great britain	53.04	-1.78	2015	MT171849	/	/
Seq1838	GB_ENG2_15_LCO_15	Culicoides obsoletus	614	Thorpe	Great britain	53.04	-1.78	2015	MT171850	/	/
Seq1839	GB_ENG2_16_LCO_16	Culicoides obsoletus	614	Thorpe	Great britain	53.04	-1.78	2015	MT171851	/	/
Seq1840	GB_ENG2_17_LCO_17	Culicoides scoticus	533	Thorpe	Great britain	53.04	-1.78	2015	MT171852	/	/
Seq1841	GB_ENG2_18_LCO_18	Culicoides scoticus	614	Thorpe	Great britain	53.04	-1.78	2015	MT171853	/	/
Seq1842	GB_ENG2_19_LCO_19	Culicoides obsoletus	612	Thorpe	Great britain	53.04	-1.78	2015	MT171854	/	/
Seq1843	GB_ENG2_20_LCO_20	Culicoides scoticus	613	Thorpe	Great britain	53.04	-1.78	2015	MT171855	/	/
Seq1844	GB_ENG2_21_LCO_21	Culicoides obsoletus	614	Thorpe	Great britain	53.04	-1.78	2015	MT171856	/	/
Seq1845	GB_ENG2_22_LCO_22	Culicoides scoticus	615	Thorpe	Great britain	53.04	-1.78	2015	MT171857	/	/
Seq1846	GB_ENG2_27_LCO_27	Culicoides scoticus	613	Thorpe	Great britain	53.04	-1.78	2015	MT171858	/	/
Seq1847	GB_ENG2_28_LCO_28	Culicoides obsoletus	616	Thorpe	Great britain	53.04	-1.78	2015	MT171859	/	/
Seq1848	GB_ENG2_30_LCO_30	Culicoides scoticus	617	Thorpe	Great britain	53.04	-1.78	2015	MT171860	/	/
Seq1849	GB_ENG2_31_LCO_31	Culicoides scoticus	614	Thorpe	Great britain	53.04	-1.78	2015	MT171861	/	/
Seq1850	GB_ENG2_34_LCO_34	Culicoides obsoletus	610	Thorpe	Great britain	53.04	-1.78	2015	MT171862	/	/
Seq1851	GB_ENG2_35_LCO_35	Culicoides scoticus	606	Thorpe	Great britain	53.04	-1.78	2015	MT171863	/	/
Seq1852	GB_ENG2_36_LCO_36	Culicoides obsoletus	614	Thorpe	Great britain	53.04	-1.78	2015	MT171864	/	/
Seq1853	GB_ENG2_37_LCO_37	Culicoides scoticus	613	Thorpe	Great britain	53.04	-1.78	2015	MT171865	/	/
Seq1854	GB_ENG2_39_LCO_39	Culicoides scoticus	613	Thorpe	Great britain	53.04	-1.78	2015	MT171866	/	/
Seq1855	GB_ENG2_40_LCO_40	Culicoides scoticus	615	Thorpe	Great britain	53.04	-1.78	2015	MT171867	/	/
Seq1856	GB_ENG2_43_LCO_43	Culicoides obsoletus	615	Thorpe	Great britain	53.04	-1.78	2015	MT171868	/	/
Seq1857	GB_ENG2_44_LCO_44	Culicoides obsoletus	610	Thorpe	Great britain	53.04	-1.78	2015	MT171869	/	/
Seq1858	GB_ENG2_45_LCO_45	Culicoides scoticus	605	Thorpe	Great britain	53.04	-1.78	2015	MT171870	/	/
Seq1859	GB_ENG2_47_LCO_47	Culicoides obsoletus	613	Thorpe	Great britain	53.04	-1.78	2015	MT171871	/	/
Seq1860	GB_MR01_LCO1490_1	Culicoides obsoletus	592	London	Great britain	51.5073	-0.131104	2010	MT171872	/	/
Seq1861	GB_MR02_LCO1490_2	Culicoides obsoletus	592	London	Great britain	51.5073	-0.131104	2010	MT171873	/	/
Seq1862	GB_MR03_LCO1490_3	Culicoides obsoletus	592	London	Great britain	51.5073	-0.131104	2010	MT171874	/	/
Seq1863	GB_MR04_LCO1490_4	Culicoides obsoletus	592	London	Great britain	51.5073	-0.131104	2010	MT171875	/	/
Seq1864	GB_MR05_LCO1490_5	Culicoides obsoletus	592	London	Great britain	51.5073	-0.131104	2010	MT171876	/	/
Seq1865	GB_MR06_LCO1490_6	Culicoides obsoletus	592	London	Great britain	51.5073	-0.131104	2010	MT171877	/	/
Seq1866	GB_MR07_LCO1490_7	Culicoides obsoletus	592	London	Great britain	51.5073	-0.131104	2010	MT171878	/	/
Seq1867	GB_MR08_LCO1490_9	Culicoides obsoletus	592	London	Great britain	51.5073	-0.131104	2010	MT171879	/	/
Seq1868	GB_MR09_LCO1490_10	Culicoides obsoletus	592	London	Great britain	51.5073	-0.131104	2010	MT171880	/	/
Seq1869	GB_MR10_LCO1490_11	Culicoides montanus	592	London	Great britain	51.5073	-0.131104	2010	MT171881	/	/
Seq1870	GB_MR11_LCO1490_12	Culicoides obsoletus	592	London	Great britain	51.5073	-0.131104	2010	MT171882	/	/
Seq1871	GB_MR12_LCO1490_13	Culicoides obsoletus	592	London	Great britain	51.5073	-0.131104	2010	MT171883	/	/
Seq1872	GB_MR13_LCO1490_14	Culicoides obsoletus	592	London	Great britain	51.5073	-0.131104	2010	MT171884	/	/
Seq1873	GB_MR14_LCO1490_15	Culicoides montanus	592	London	Great britain	51.5073	-0.131104	2010	MT171885	/	/
Seq1874	GB_MR15_LCO1490_16	Culicoides obsoletus	592	London	Great britain	51.5073	-0.131104	2010	MT171886	/	/
Seq1875	GB_MR16_LCO1490_17	Culicoides montanus	592	London	Great britain	51.5073	-0.131104	2010	MT171887	/	/
Seq1876	GB_MR17_LCO1490_18	Culicoides obsoletus	592	London	Great britain	51.5073	-0.131104	2010	MT171888	/	/
Seq1877	GB_MR18_LCO1490_19	Culicoides obsoletus	592	London	Great britain	51.5073	-0.131104	2010	MT171889	/	/
Seq1878	GB_MR19_LCO1490_20	Culicoides montanus	592	London	Great britain	51.5073	-0.131104	2010	MT171890	/	/
Seq1879	GB_MR20_LCO1490_21	Culicoides obsoletus	592	London	Great britain	51.5073	-0.131104	2010	MT171891	/	/
Seq1880	GB_MR21_LCO1490_22	Culicoides obsoletus	592	London	Great britain	51.5073	-0.131104	2010	MT171892	/	/
Seq1881	GB_MR22_LCO1490_23	Culicoides obsoletus	592	London	Great britain	51.5073	-0.131104	2010	MT171893	/	/
Seq1882	GB_MR23_LCO1490_24	Culicoides obsoletus	592	London	Great britain	51.5073	-0.131104	2010	MT171894	/	/
Seq1883	GB_MR24_LCO1490_25	Culicoides obsoletus	592	London	Great britain	51.5073	-0.131104	2010	MT171895	/	/
Seq1884	GB_MR25_LCO1490_26	Culicoides obsoletus	592	London	Great britain	51.5073	-0.131104	2010	MT171896	/	/
Seq1885	GB_MR26_LCO1490_27	Culicoides obsoletus	592	London	Great britain	51.5073	-0.131104	2010	MT171897	/	/
Seq1886	GB_MR27_LCO1490_28	Culicoides obsoletus	592	London	Great britain	51.5073	-0.131104	2010	MT171898	/	/
Seq1887	GB_MR28_LCO1490_29	Culicoides obsoletus	592	London	Great britain	51.5073	-0.131104	2010	MT171899	/	/
Seq1888	GB_MR29_LCO1490_30	Culicoides obsoletus	592	London	Great britain	51.5073	-0.131104	2010	MT171900	/	/
Seq1889	GB_MR30_LCO1490_31	Culicoides obsoletus	592	London	Great britain	51.5073	-0.131104	2010	MT171901	/	/
Seq1890	GB_MR31_LCO1490_32	Culicoides obsoletus	592	London	Great britain	51.5073	-0.131104	2010	MT171902	/	/
Seq1891	GR1_01_LCO_1	Culicoides obsoletus	519	Varybobi	Greece	38.13	23.78	2016	MT171903	/	/
Seq1892	GR1_02_LCO_2	Culicoides obsoletus	519	Varybobi	Greece	38.13	23.78	2016	MT171904	/	/
Seq1893	GR1_03_LCO_3	Culicoides obsoletus	519	Varybobi	Greece	38.13	23.78	2016	MT171905	/	/
Seq1894	GR1_04_LCO_4	Culicoides obsoletus	519	Varybobi	Greece	38.13	23.78	2016	MT171906	/	/
Seq1895	GR1_05_LCO_5	Culicoides obsoletus	519	Varybobi	Greece	38.13	23.78	2016	MT171907	/	/
Seq1896	GR1_06_LCO_6	Culicoides obsoletus	519	Varybobi	Greece	38.13	23.78	2016	MT171908	/	/
Seq1897	GR10_03_LCO_3	Culicoides obsoletus	519	Velestino	Greece	39.38	22.75	2016	MT171909	/	/
Seq1898	GR10_04_LCO_4	Culicoides obsoletus	519	Velestino	Greece	39.38	22.75	2016	MT171910	/	/
Seq1899	GR10_05_LCO_5	Culicoides obsoletus	519	Velestino	Greece	39.38	22.75	2016	MT171911	/	/
Seq1900	GR10_06_LCO_6	Culicoides obsoletus	519	Velestino	Greece	39.38	22.75	2016	MT171912	/	/
Seq1901	GR10_07_LCO_7	Culicoides obsoletus	519	Velestino	Greece	39.38	22.75	2016	MT171913	/	/
Seq1902	GR10_08_LCO_8	Culicoides obsoletus	519	Velestino	Greece	39.38	22.75	2016	MT171914	/	/
Seq1903	GR10_11_LCO_11	Culicoides obsoletus	519	Velestino	Greece	39.38	22.75	2016	MT171915	/	/
Seq1904	GR10_12_LCO_12	Culicoides obsoletus	519	Velestino	Greece	39.38	22.75	2016	MT171916	/	/
Seq1905	GR10_13_LCO_13	Culicoides obsoletus	519	Velestino	Greece	39.38	22.75	2016	MT171917	/	/
Seq1906	GR10_15_LCO_15	Culicoides obsoletus	519	Velestino	Greece	39.38	22.75	2016	MT171918	/	/
Seq1907	GR10_16_LCO_16	Culicoides obsoletus	519	Velestino	Greece	39.38	22.75	2016	MT171919	/	/
Seq1908	GR10_17_LCO_17	Culicoides obsoletus	519	Velestino	Greece	39.38	22.75	2016	MT171920	/	/
Seq1909	GR10_18_LCO_18	Culicoides obsoletus	519	Velestino	Greece	39.38	22.75	2016	MT171921	/	/
Seq1910	GR10_20_LCO_20	Culicoides obsoletus	519	Velestino	Greece	39.38	22.75	2016	MT171922	/	/
Seq1911	GR10_21_LCO_21	Culicoides obsoletus	519	Velestino	Greece	39.38	22.75	2016	MT171923	/	/
Seq1912	GR10_23_LCO_23	Culicoides obsoletus	512	Velestino	Greece	39.38	22.75	2016	MT171924	/	/
Seq1913	GR10_24_LCO_24	Culicoides obsoletus	512	Velestino	Greece	39.38	22.75	2016	MT171925	/	/
Seq1914	GR10_26_LCO_26	Culicoides obsoletus	512	Velestino	Greece	39.38	22.75	2016	MT171926	/	/
Seq1915	GR10_27_LCO_27	Culicoides obsoletus	512	Velestino	Greece	39.38	22.75	2016	MT171927	/	/
Seq1916	GR10_28_LCO_28	Culicoides obsoletus	512	Velestino	Greece	39.38	22.75	2016	MT171928	/	/
Seq1917	GR10_29_LCO_29	Culicoides obsoletus	512	Velestino	Greece	39.38	22.75	2016	MT171929	/	/
Seq1918	GR11_01_LCO_33	Culicoides obsoletus	512	Velestino	Greece	39.38	22.75	2016	MT171930	/	/
Seq1919	GR11_02_LCO_34	Culicoides obsoletus	512	Velestino	Greece	39.38	22.75	2016	MT171931	/	/
Seq1920	GR11_03_LCO_35	Culicoides obsoletus	512	Velestino	Greece	39.38	22.75	2016	MT171932	/	/
Seq1921	GR11_04_LCO_36	Culicoides obsoletus	512	Velestino	Greece	39.38	22.75	2016	MT171933	/	/
Seq1922	GR11_05_LCO_37	Culicoides obsoletus	512	Velestino	Greece	39.38	22.75	2016	MT171934	/	/
Seq1923	GR11_06_LCO_38	Culicoides obsoletus	512	Velestino	Greece	39.38	22.75	2016	MT171935	/	/
Seq1924	GR11_08_LCO_40	Culicoides obsoletus	512	Velestino	Greece	39.38	22.75	2016	MT171936	/	/
Seq1925	GR11_11_LCO_43	Culicoides obsoletus	512	Velestino	Greece	39.38	22.75	2016	MT171937	/	/
Seq1926	GR11_13_LCO_45	Culicoides obsoletus	512	Velestino	Greece	39.38	22.75	2016	MT171938	/	/
Seq1927	GR11_14_LCO_46	Culicoides obsoletus	512	Velestino	Greece	39.38	22.75	2016	MT171939	/	/
Seq1928	GR11_15_LCO_47	Culicoides obsoletus	512	Velestino	Greece	39.38	22.75	2016	MT171940	/	/
Seq1929	GR11_16_LCO_48	Culicoides obsoletus	512	Velestino	Greece	39.38	22.75	2016	MT171941	/	/
Seq1930	GR11_17_LCO_49	Culicoides obsoletus	512	Velestino	Greece	39.38	22.75	2016	MT171942	/	/
Seq1931	GR11_18_LCO_50	Culicoides obsoletus	512	Velestino	Greece	39.38	22.75	2016	MT171943	/	/
Seq1932	GR11_19_LCO_51	Culicoides obsoletus	512	Velestino	Greece	39.38	22.75	2016	MT171944	/	/
Seq1933	GR11_20_LCO_52	Culicoides obsoletus	512	Velestino	Greece	39.38	22.75	2016	MT171945	/	/
Seq1934	GR11_21_LCO_53	Culicoides obsoletus	512	Velestino	Greece	39.38	22.75	2016	MT171946	/	/
Seq1935	GR11_22_LCO_54	Culicoides obsoletus	546	Velestino	Greece	39.38	22.75	2016	MT171947	/	/
Seq1936	GR11_24_LCO_56	Culicoides obsoletus	546	Velestino	Greece	39.38	22.75	2016	MT171948	/	/
Seq1937	GR11_25_LCO_57	Culicoides obsoletus	546	Velestino	Greece	39.38	22.75	2016	MT171949	/	/
Seq1938	GR11_26_LCO_58	Culicoides obsoletus	546	Velestino	Greece	39.38	22.75	2016	MT171950	/	/
Seq1939	GR11_31_LCO_63	Culicoides obsoletus	546	Velestino	Greece	39.38	22.75	2016	MT171951	/	/
Seq1940	GR11_32_LCO_64	Culicoides obsoletus	546	Velestino	Greece	39.38	22.75	2016	MT171952	/	/
Seq1941	GR12_01_LCO_65	Culicoides obsoletus	546	Velestino	Greece	39.38	22.75	2016	MT171953	/	/
Seq1942	GR12_02_LCO_66	Culicoides obsoletus	546	Velestino	Greece	39.38	22.75	2016	MT171954	/	/
Seq1943	GR12_03_LCO_67	Culicoides obsoletus	546	Velestino	Greece	39.38	22.75	2016	MT171955	/	/
Seq1944	GR12_04_LCO_68	Culicoides obsoletus	546	Velestino	Greece	39.38	22.75	2016	MT171956	/	/
Seq1945	GR12_05_LCO_69	Culicoides obsoletus	546	Velestino	Greece	39.38	22.75	2016	MT171957	/	/
Seq1946	GR12_06_LCO_70	Culicoides obsoletus	546	Velestino	Greece	39.38	22.75	2016	MT171958	/	/
Seq1947	GR12_07_LCO_71	Culicoides obsoletus	546	Velestino	Greece	39.38	22.75	2016	MT171959	/	/
Seq1948	GR12_09_LCO_73	Culicoides obsoletus	546	Velestino	Greece	39.38	22.75	2016	MT171960	/	/
Seq1949	GR12_10_LCO_74	Culicoides obsoletus	546	Velestino	Greece	39.38	22.75	2016	MT171961	/	/
Seq1950	GR12_11_LCO_75	Culicoides obsoletus	546	Velestino	Greece	39.38	22.75	2016	MT171962	/	/
Seq1951	GR12_12_LCO_76	Culicoides obsoletus	546	Velestino	Greece	39.38	22.75	2016	MT171963	/	/
Seq1952	GR12_13_LCO_77	Culicoides obsoletus	546	Velestino	Greece	39.38	22.75	2016	MT171964	/	/
Seq1953	GR12_14_LCO_78	Culicoides obsoletus	546	Velestino	Greece	39.38	22.75	2016	MT171965	/	/
Seq1954	GR12_15_LCO_79	Culicoides obsoletus	546	Velestino	Greece	39.38	22.75	2016	MT171966	MT163137	MT175673
Seq1955	GR12_16_LCO_80	Culicoides obsoletus	546	Velestino	Greece	39.38	22.75	2016	MT171967	/	/
Seq1956	GR12_17_LCO_81	Culicoides obsoletus	546	Velestino	Greece	39.38	22.75	2016	MT171968	/	/
Seq1957	GR12_18_LCO_82	Culicoides obsoletus	546	Velestino	Greece	39.38	22.75	2016	MT171969	/	/
Seq1958	GR12_19_LCO_83	Culicoides obsoletus	546	Velestino	Greece	39.38	22.75	2016	MT171970	/	/
Seq1959	GR12_20_LCO_84	Culicoides obsoletus	546	Velestino	Greece	39.38	22.75	2016	MT171971	/	/
Seq1960	GR12_21_LCO_85	Culicoides obsoletus	546	Velestino	Greece	39.38	22.75	2016	MT171972	/	/
Seq1961	GR12_22_LCO_86	Culicoides obsoletus	546	Velestino	Greece	39.38	22.75	2016	MT171973	/	/
Seq1962	GR12_23_LCO_87	Culicoides obsoletus	546	Velestino	Greece	39.38	22.75	2016	MT171974	/	/
Seq1963	GR12_24_LCO_88	Culicoides obsoletus	512	Velestino	Greece	39.38	22.75	2016	MT171975	/	/
Seq1964	GR12_25_LCO_89	Culicoides obsoletus	512	Velestino	Greece	39.38	22.75	2016	MT171976	/	/
Seq1965	GR12_27_LCO_91	Culicoides obsoletus	512	Velestino	Greece	39.38	22.75	2016	MT171977	/	/
Seq1966	GR12_28_LCO_92	Culicoides obsoletus	512	Velestino	Greece	39.38	22.75	2016	MT171978	/	/
Seq1967	GR12_29_LCO_93	Culicoides obsoletus	512	Velestino	Greece	39.38	22.75	2016	MT171979	/	/
Seq1968	GR12_30_LCO_94	Culicoides obsoletus	512	Velestino	Greece	39.38	22.75	2016	MT171980	/	/
Seq1969	GR13_01_LCO_1	Culicoides obsoletus	512	Velestino	Greece	39.38	22.75	2016	MT171981	/	/
Seq1970	GR13_02_LCO_2	Culicoides obsoletus	512	Velestino	Greece	39.38	22.75	2016	MT171982	/	/
Seq1971	GR13_04_LCO_4	Culicoides obsoletus	512	Velestino	Greece	39.38	22.75	2016	MT171983	/	/
Seq1972	GR13_06_LCO_6	Culicoides obsoletus	512	Velestino	Greece	39.38	22.75	2016	MT171984	/	/
Seq1973	GR13_14_LCO_14	Culicoides obsoletus	512	Velestino	Greece	39.38	22.75	2016	MT171985	/	/
Seq1974	GR13_16_LCO_16	Culicoides obsoletus	512	Velestino	Greece	39.38	22.75	2016	MT171986	/	/
Seq1975	GR13_19_LCO_19	Culicoides obsoletus	512	Velestino	Greece	39.38	22.75	2016	MT171987	/	/
Seq1976	GR13_20_LCO_20	Culicoides obsoletus	512	Velestino	Greece	39.38	22.75	2016	MT171988	/	/
Seq1977	GR13_21_LCO_21	Culicoides obsoletus	512	Velestino	Greece	39.38	22.75	2016	MT171989	/	/
Seq1978	GR13_23_LCO_23	Culicoides obsoletus	546	Velestino	Greece	39.38	22.75	2016	MT171990	/	/
Seq1979	GR13_24_LCO_24	Culicoides obsoletus	546	Velestino	Greece	39.38	22.75	2016	MT171991	/	/
Seq1980	GR13_25_LCO_25	Culicoides obsoletus	524	Velestino	Greece	39.38	22.75	2016	MT171992	/	/
Seq1981	GR13_29_LCO_29	Culicoides obsoletus	524	Velestino	Greece	39.38	22.75	2016	MT171993	/	/
Seq1982	GR13_31_LCO_31	Culicoides obsoletus	546	Velestino	Greece	39.38	22.75	2016	MT171994	/	/
Seq1983	GR13_32_LCO_32	Culicoides obsoletus	546	Velestino	Greece	39.38	22.75	2016	MT171995	/	/
Seq1984	GR14_01_LCO_33	Culicoides obsoletus	546	Velestino	Greece	39.38	22.75	2016	MT171996	/	/
Seq1985	GR14_02_LCO_34	Culicoides obsoletus	546	Velestino	Greece	39.38	22.75	2016	MT171997	/	/
Seq1986	GR14_07_LCO_39	Culicoides obsoletus	546	Velestino	Greece	39.38	22.75	2016	MT171998	/	/
Seq1987	GR14_08_LCO_40	Culicoides obsoletus	546	Velestino	Greece	39.38	22.75	2016	MT171999	/	/
Seq1988	GR14_13_LCO_45	Culicoides obsoletus	522	Velestino	Greece	39.38	22.75	2016	MT172000	/	/
Seq1989	GR14_14_LCO_46	Culicoides obsoletus	522	Velestino	Greece	39.38	22.75	2016	MT172001	/	/
Seq1990	GR14_15_LCO_47	Culicoides obsoletus	552	Velestino	Greece	39.38	22.75	2016	MT172002	/	/
Seq1991	GR14_16_LCO_48	Culicoides obsoletus	552	Velestino	Greece	39.38	22.75	2016	MT172003	/	/
Seq1992	GR14_23_LCO_55	Culicoides obsoletus	552	Velestino	Greece	39.38	22.75	2016	MT172004	/	/
Seq1993	GR14_26_LCO_58	Culicoides obsoletus	552	Velestino	Greece	39.38	22.75	2016	MT172005	/	/
Seq1994	GR16_01_LCO_87	Culicoides obsoletus	552	Velestino	Greece	39.38	22.75	2016	MT172006	/	/
Seq1995	GR16_04_LCO_90	Culicoides obsoletus	552	Velestino	Greece	39.38	22.75	2016	MT172007	/	/
Seq1996	GR2_01_LCO_7	Culicoides obsoletus	544	Varybobi	Greece	38.13	23.78	2016	MT172008	/	/
Seq1997	GR2_02_LCO_8	Culicoides obsoletus	544	Varybobi	Greece	38.13	23.78	2016	MT172009	/	/
Seq1998	GR2_03_LCO_9	Culicoides obsoletus	544	Varybobi	Greece	38.13	23.78	2016	MT172010	/	/
Seq1999	GR2_04_LCO_10	Culicoides obsoletus	544	Varybobi	Greece	38.13	23.78	2016	MT172011	/	/
Seq2000	GR2_05_LCO_11	Culicoides obsoletus	544	Varybobi	Greece	38.13	23.78	2016	MT172012	/	/
Seq2001	GR3_02_LCO_13	Culicoides obsoletus	545	Varybobi	Greece	38.13	23.78	2016	MT172013	/	/
Seq2002	GR3_03_LCO_14	Culicoides obsoletus	545	Varybobi	Greece	38.13	23.78	2016	MT172014	/	/
Seq2003	GR3_05_LCO_16	Culicoides obsoletus	545	Varybobi	Greece	38.13	23.78	2016	MT172015	/	/
Seq2004	GR3_06_LCO_17	Culicoides obsoletus	545	Varybobi	Greece	38.13	23.78	2016	MT172016	/	/
Seq2005	GR3_07_LCO_18	Culicoides obsoletus	545	Varybobi	Greece	38.13	23.78	2016	MT172017	/	/
Seq2006	GR3_08_LCO_19	Culicoides montanus	545	Varybobi	Greece	38.13	23.78	2016	MT172018	/	/
Seq2007	GR3_09_LCO_20	Culicoides obsoletus	545	Varybobi	Greece	38.13	23.78	2016	MT172019	/	/
Seq2008	GR3_10_LCO_21	Culicoides obsoletus	545	Varybobi	Greece	38.13	23.78	2016	MT172020	/	/
Seq2009	GR3_11_LCO_22	Culicoides obsoletus	545	Varybobi	Greece	38.13	23.78	2016	MT172021	/	/
Seq2010	GR3_12_LCO_23	Culicoides obsoletus	545	Varybobi	Greece	38.13	23.78	2016	MT172022	/	/
Seq2011	GR3_13_LCO_24	Culicoides obsoletus	545	Varybobi	Greece	38.13	23.78	2016	MT172023	/	/
Seq2012	GR3_14_LCO_25	Culicoides obsoletus	545	Varybobi	Greece	38.13	23.78	2016	MT172024	/	/
[truncated: 1,764 more rows]
